# Supplementary material for: C–C coupling formation using nitron complexes
Source: Royal Society of Chemistry journal article supplement (doi:10.1039/d0dt02937h), 2020-01-01
Supplement: d0dt02937h1.pdf [file d0dt02937h1.pdf]

## Supporting Information

### C-C Coupling with Nitron NHC Complexes

Mehmet Sevim,<sup>a</sup> Serdar Batıkan Kavukcu,<sup>a</sup> Armağan Kınal,<sup>a</sup> Onur Şahin,<sup>b</sup> Hayati Türkmen<sup>a\*</sup>

<sup>a</sup>Department of Chemistry, Ege University, 35100 Bornova, Izmir, Turkey

<sup>b</sup> Scientific and Technological Research Application and Research Center, University of Sinop, 57000 Sinop, Turkey

#### Contents

<sup>1</sup>H-NMR spectra of Nitron

NMR spectras of complexes **1-9**

NMR spectras of alpha-alkylated products

NMR spectras of Suzuki products

The time course of Suzuki-Miyaura Coupling reaction

FTIR Spectrums of complexes **1-9**

Crystal data and structure refinement parameters for **1-4** and **6**

Cartesian

# $^1\text{H}$ -NMR spectra of Nitron

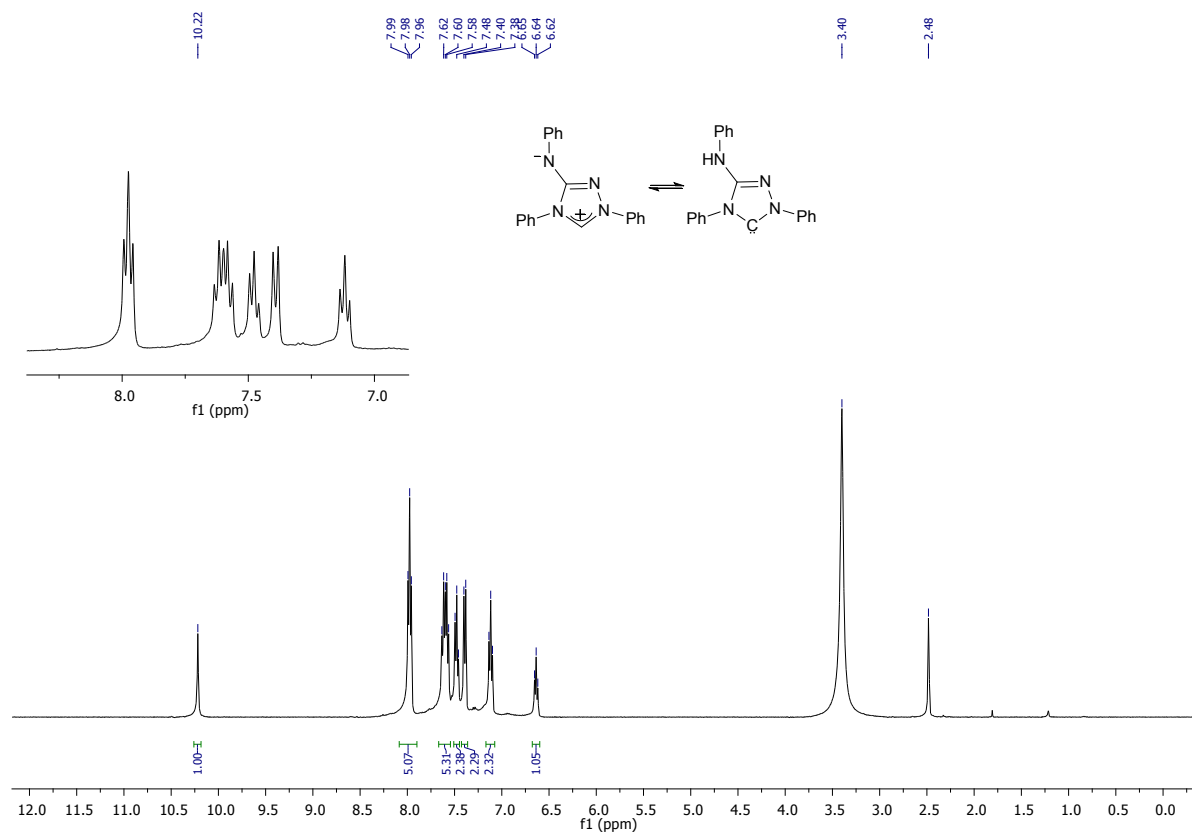

**Figure S1.**  $^1\text{H}$  NMR spectrum of Nitron ( $\text{CDCl}_3$ ).

# $^1\text{H}$ - and $^{13}\text{C}$ - NMR spectra of the complexes **1-9**

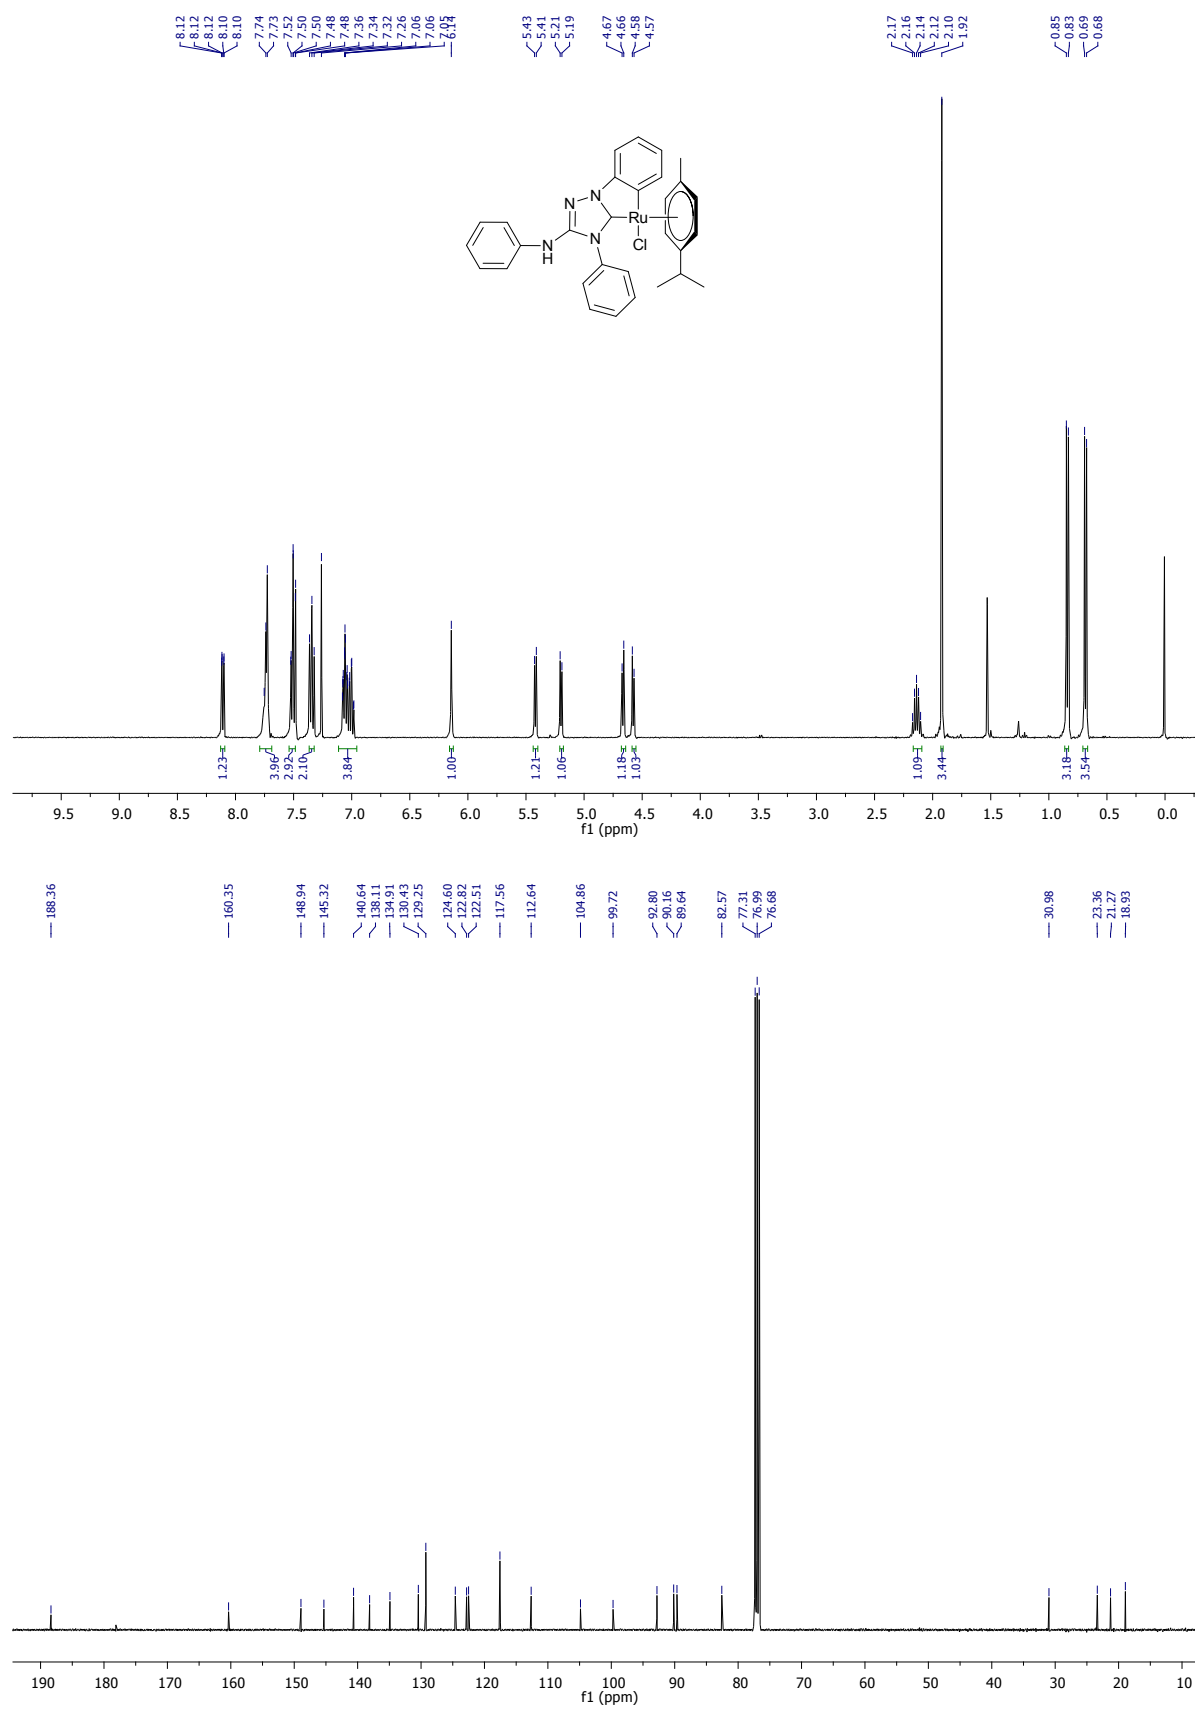

Figure S2.  $^1\text{H}$  and  $^{13}\text{C}$  NMR spectra of complex **1** ( $\text{CDCl}_3$ ).

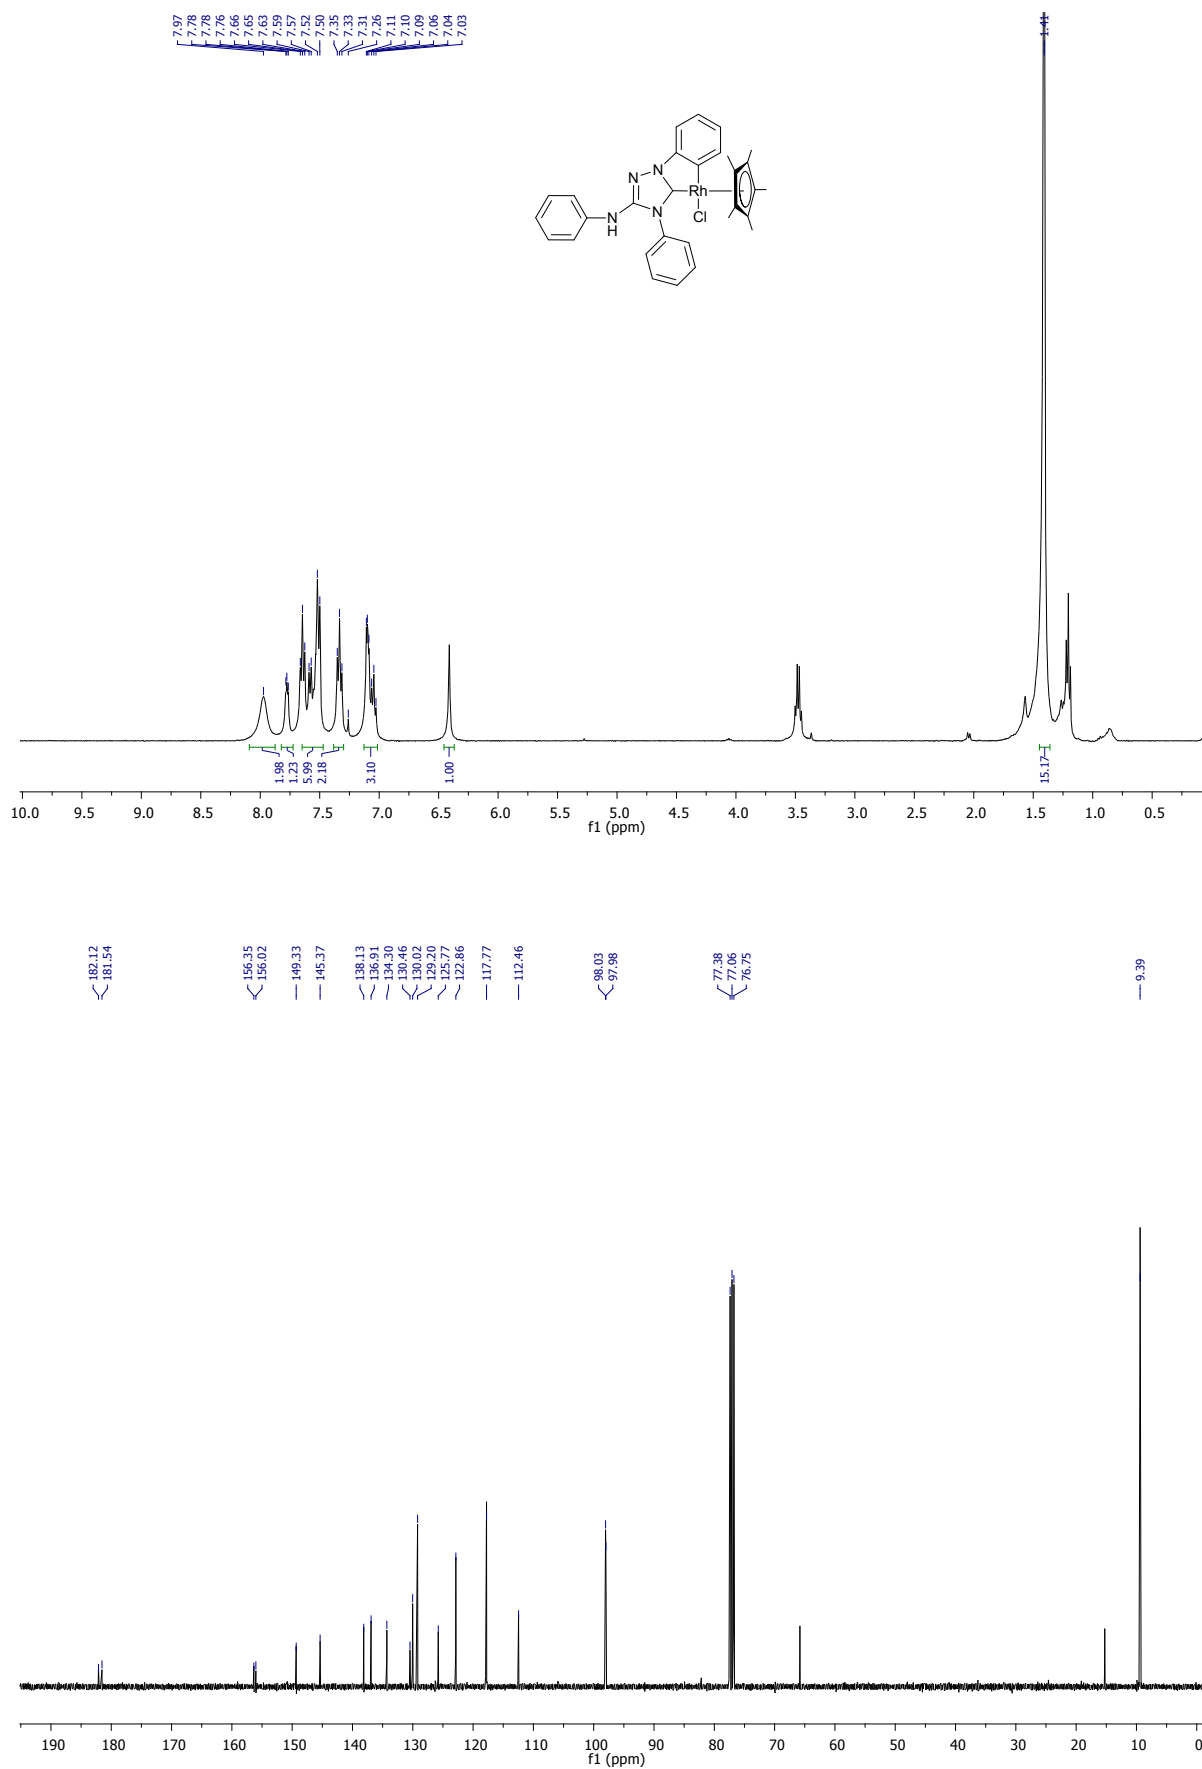

Figure S3. <sup>1</sup>H and <sup>13</sup>C NMR spectra of complex 2 (CDCl<sub>3</sub>).

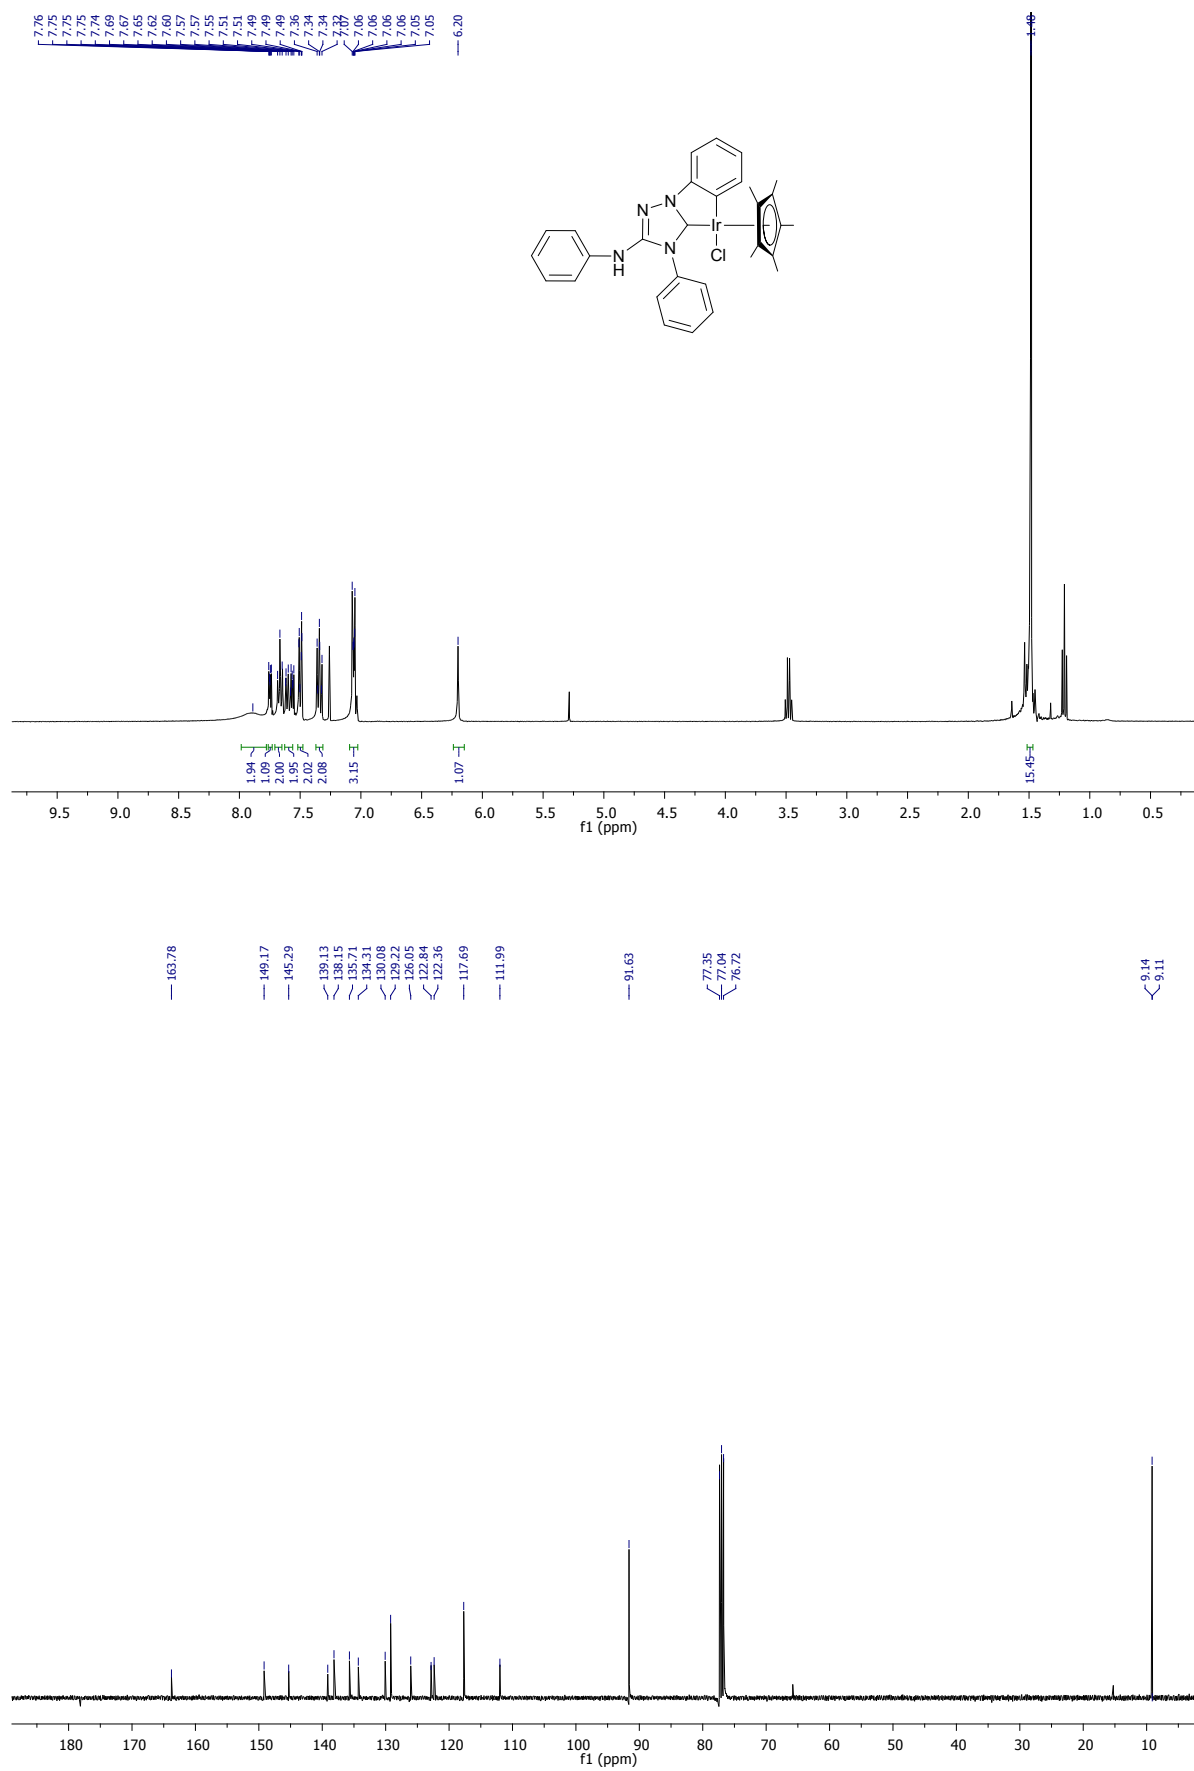

Figure S4. <sup>1</sup>H and <sup>13</sup>C NMR spectra of complex **3** (CDCl<sub>3</sub>).

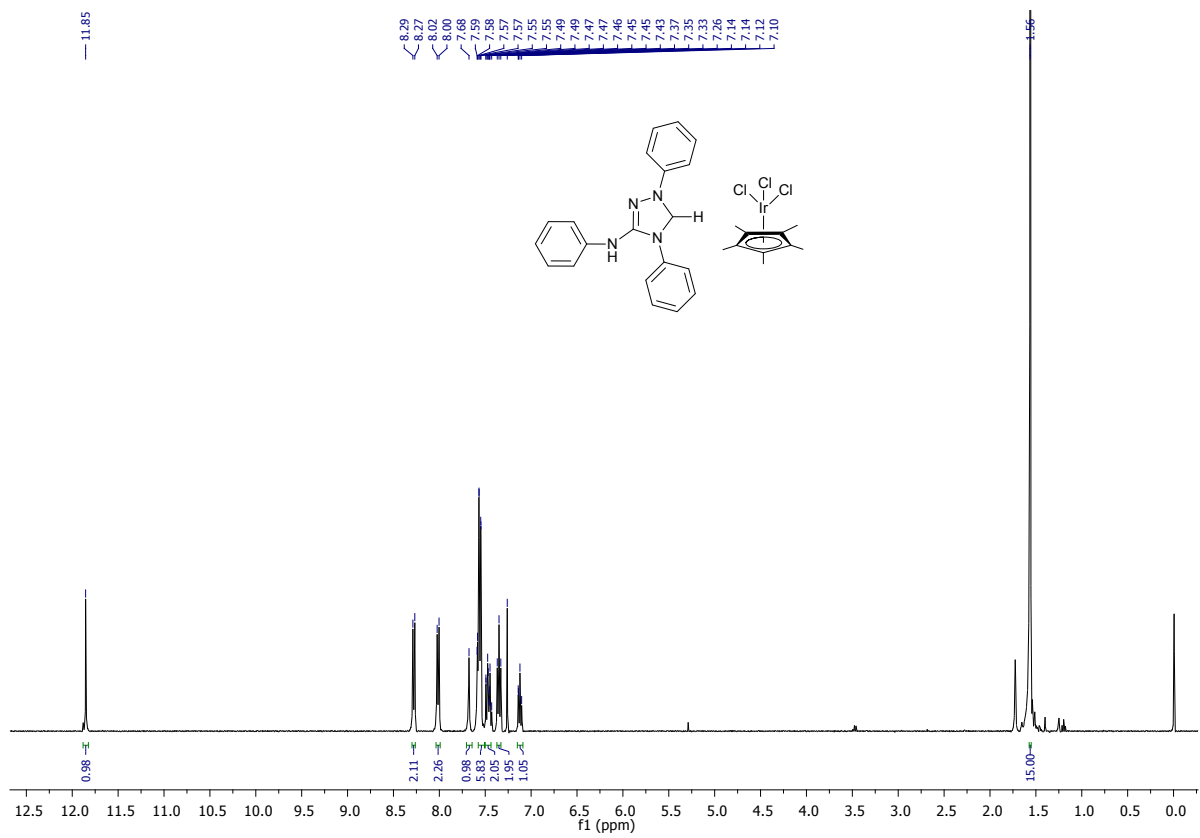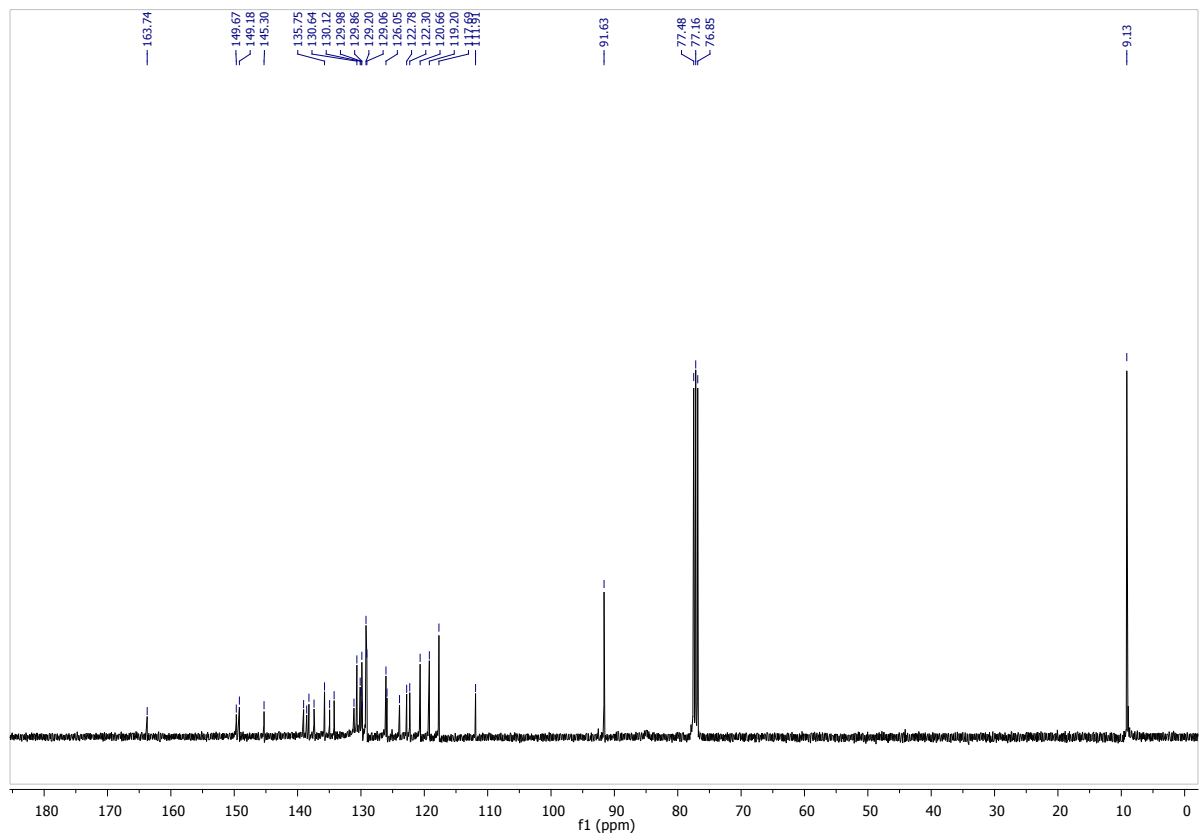

Figure S5. <sup>1</sup>H and <sup>13</sup>C NMR spectra of complex 4 (CDCl<sub>3</sub>)

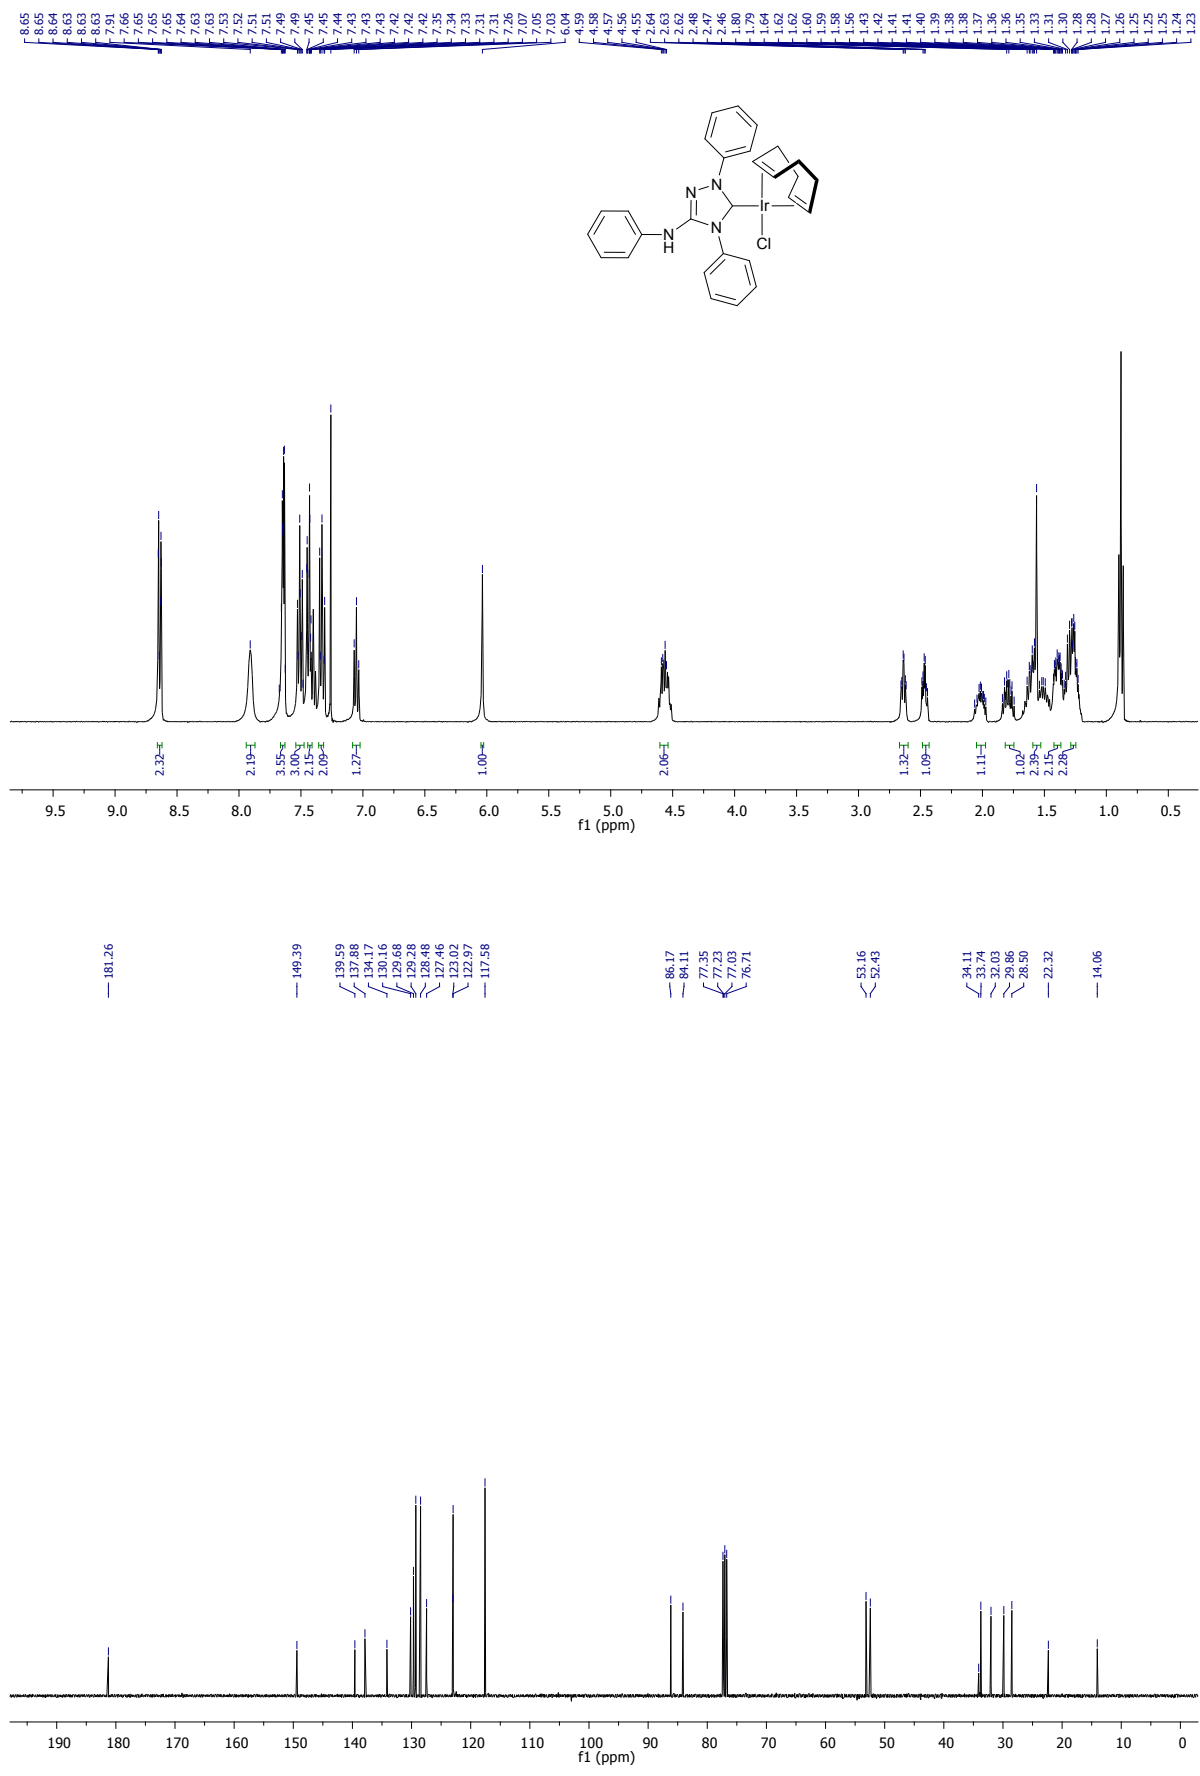

Figure S6. <sup>1</sup>H and <sup>13</sup>C NMR spectra of complex 5 (CDCl<sub>3</sub>).

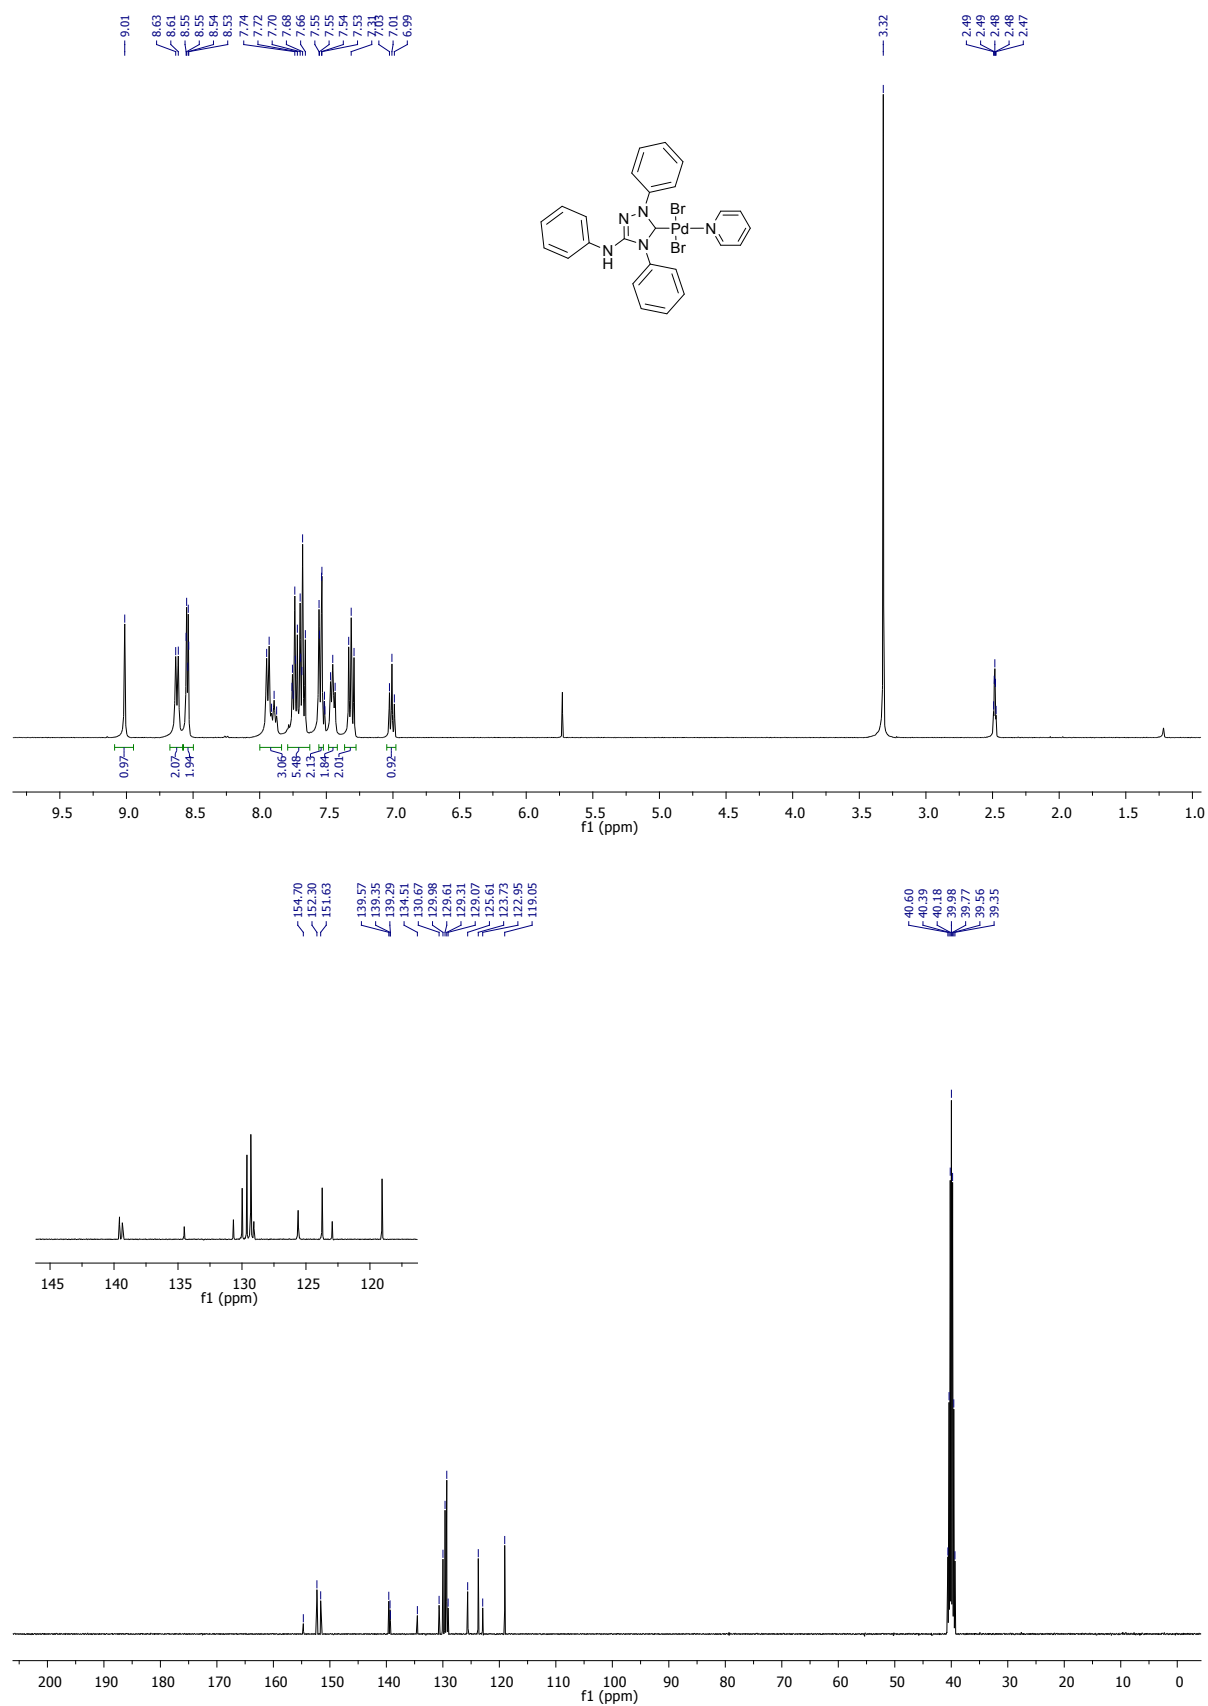

Figure S7.  $^1\text{H}$  and  $^{13}\text{C}$  NMR spectrums of complex 6 (DMSO- $d_6$ ).



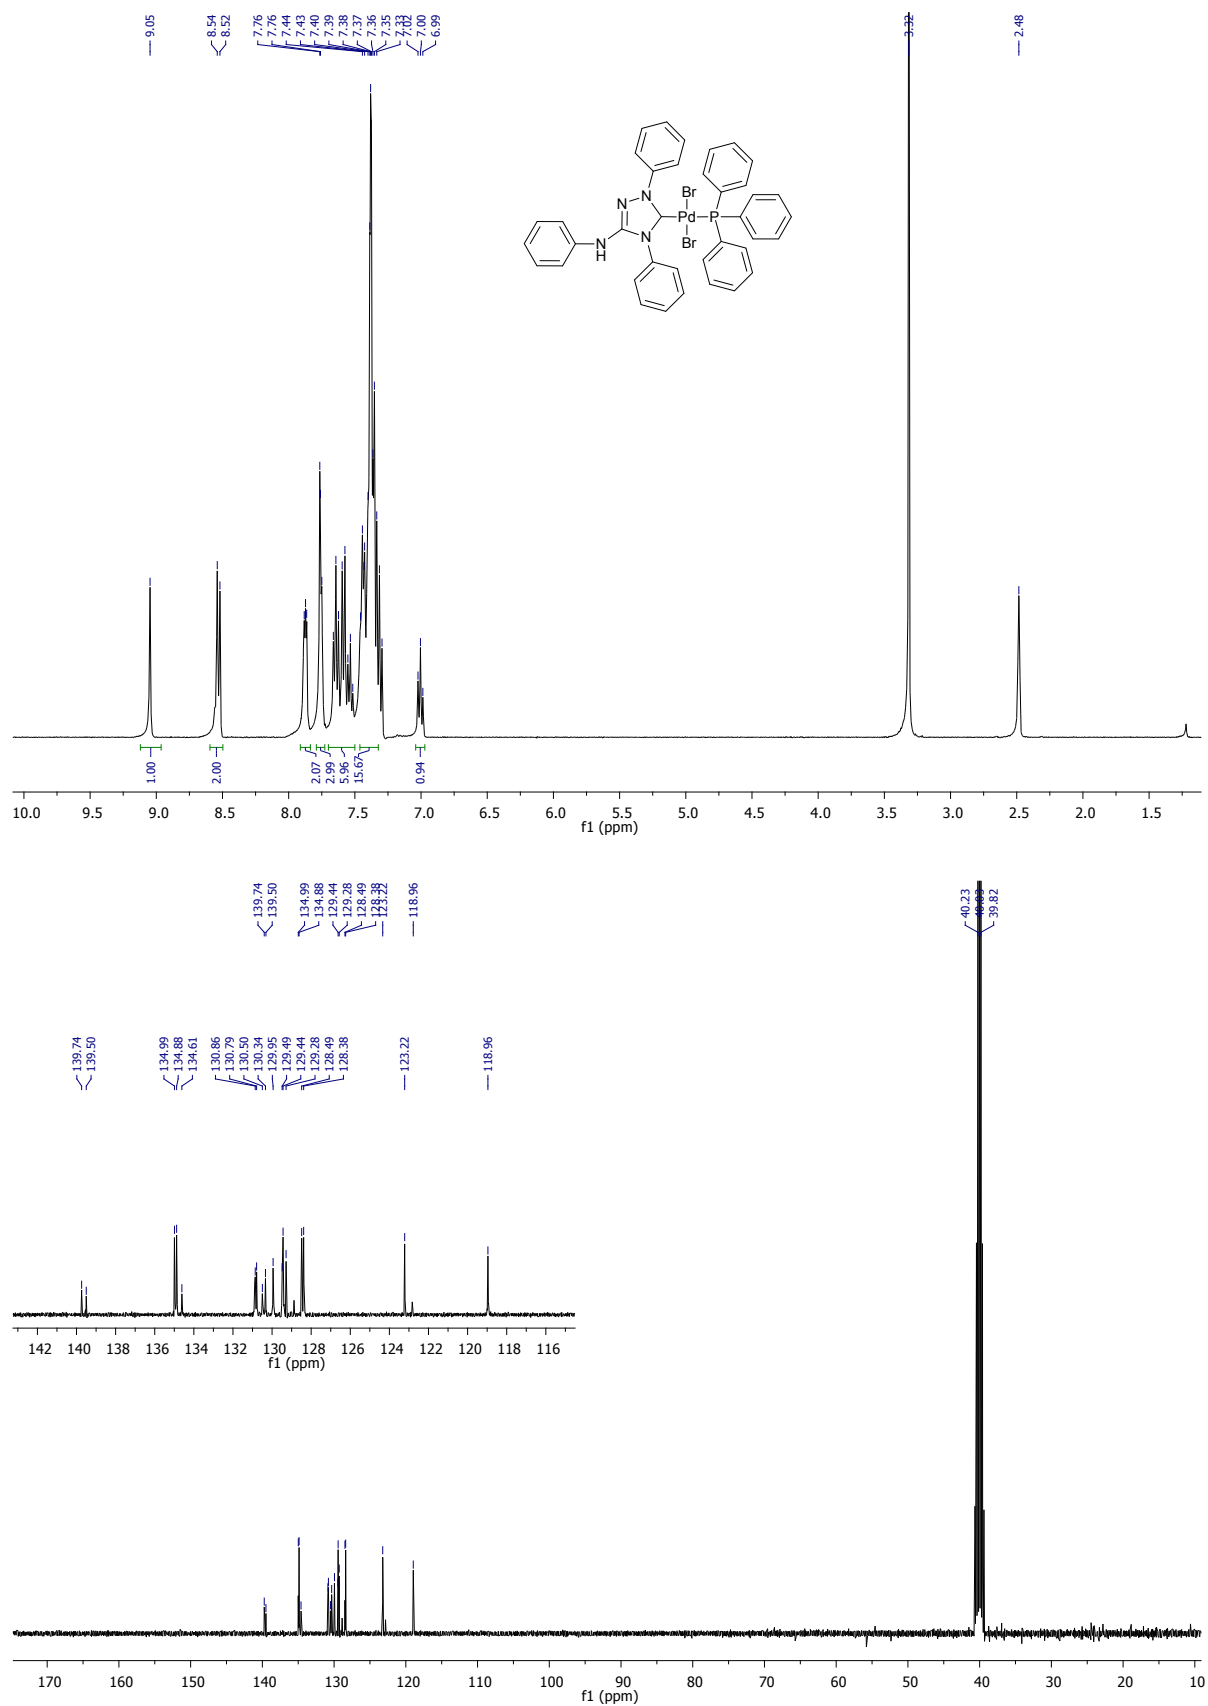

**Figure S8.** <sup>1</sup>H and <sup>13</sup>C NMR spectra of complex **7** (DMSO-*d*<sub>6</sub>).

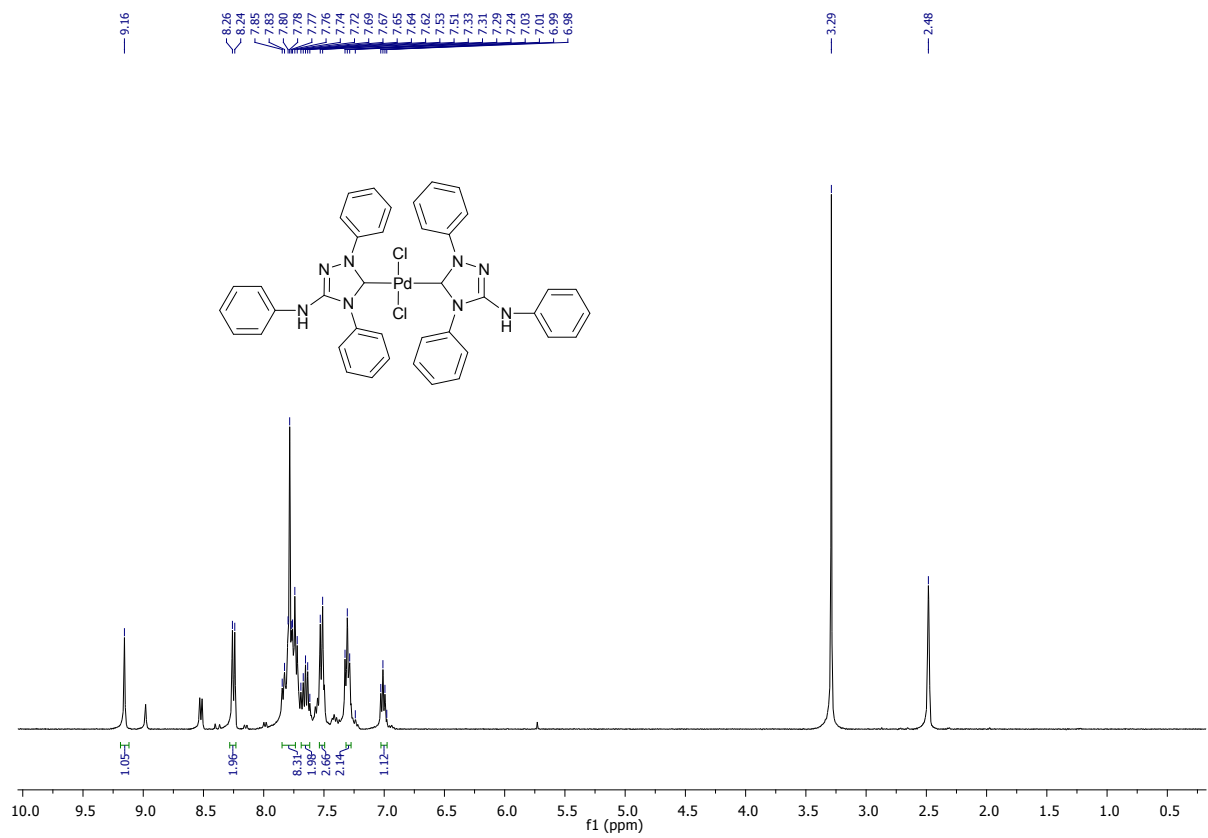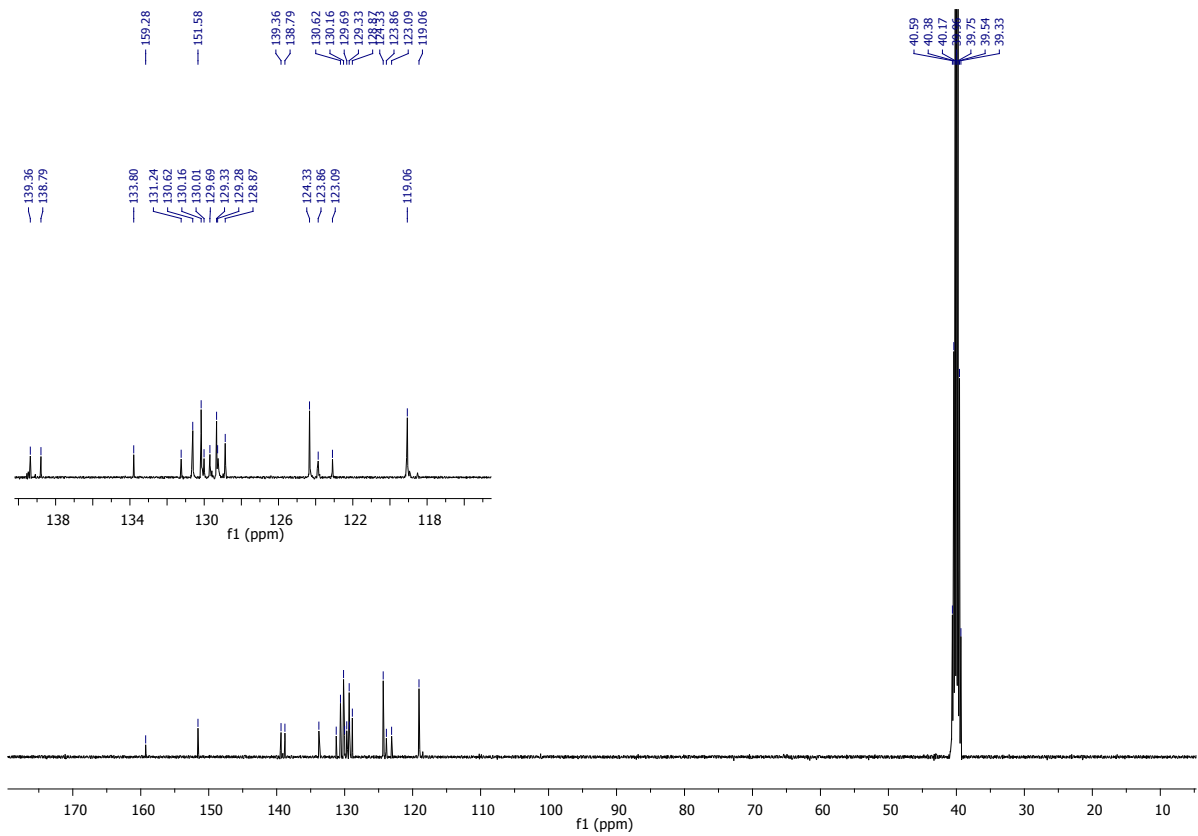

Figure S9.  $^1\text{H}$  and  $^{13}\text{C}$  NMR spectra of complex 8 (DMSO- $d_6$ ).

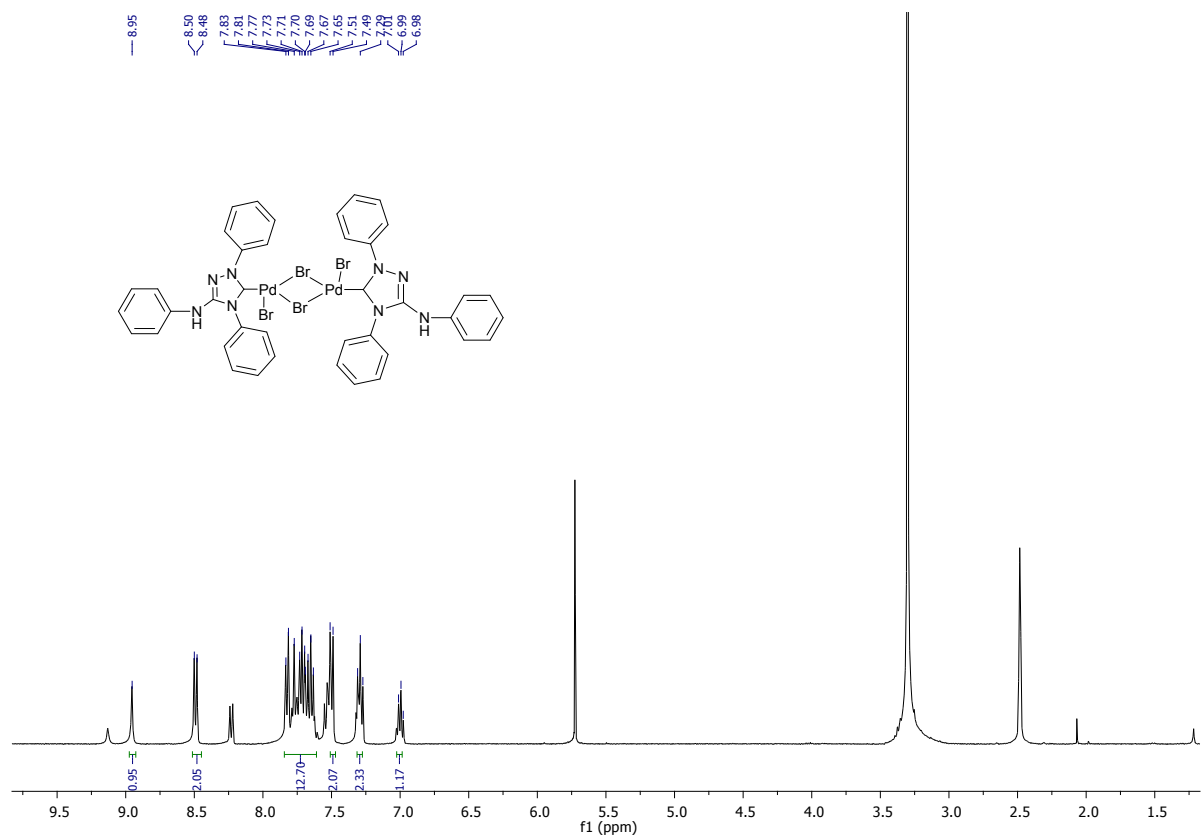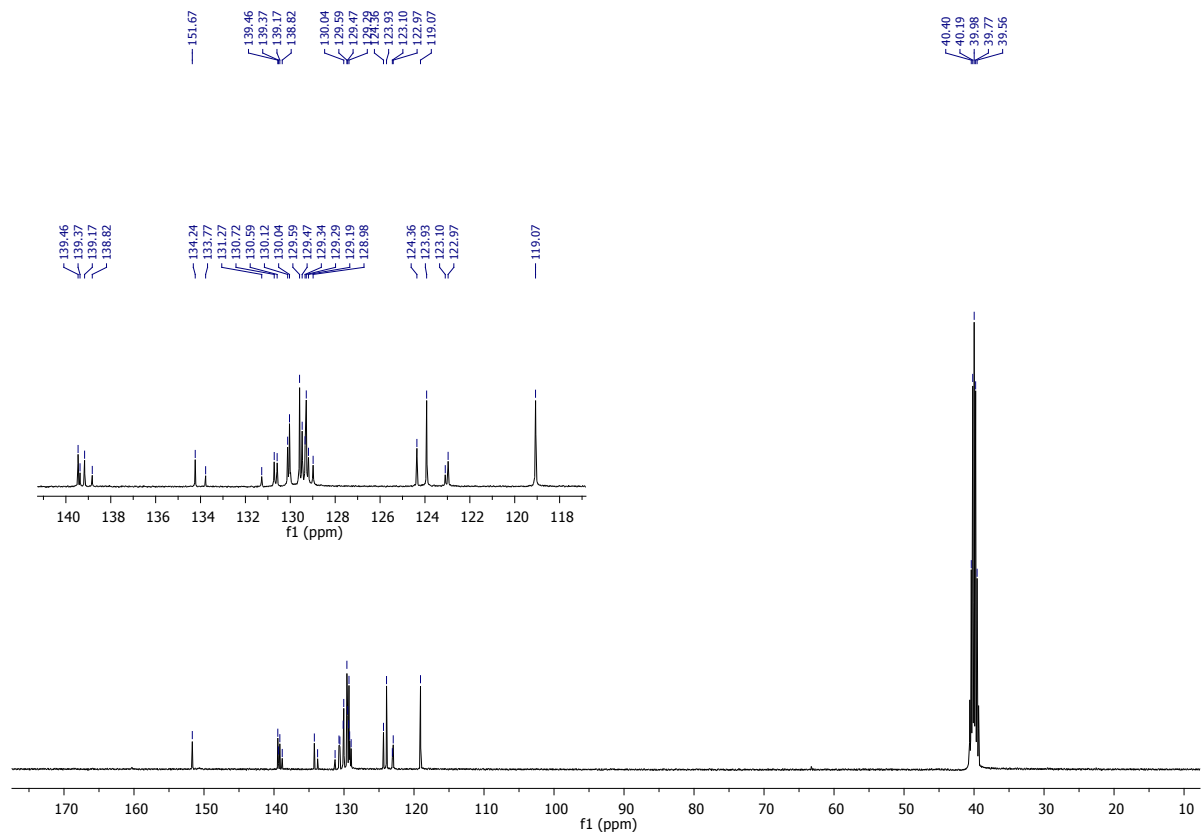

Figure S10.  $^1\text{H}$  and  $^{13}\text{C}$  NMR spectra of complex 9 (DMSO- $d_6$ ).

# $^1\text{H}$ and $^{13}\text{C}$ NMR spectra of alpha-alkylated products

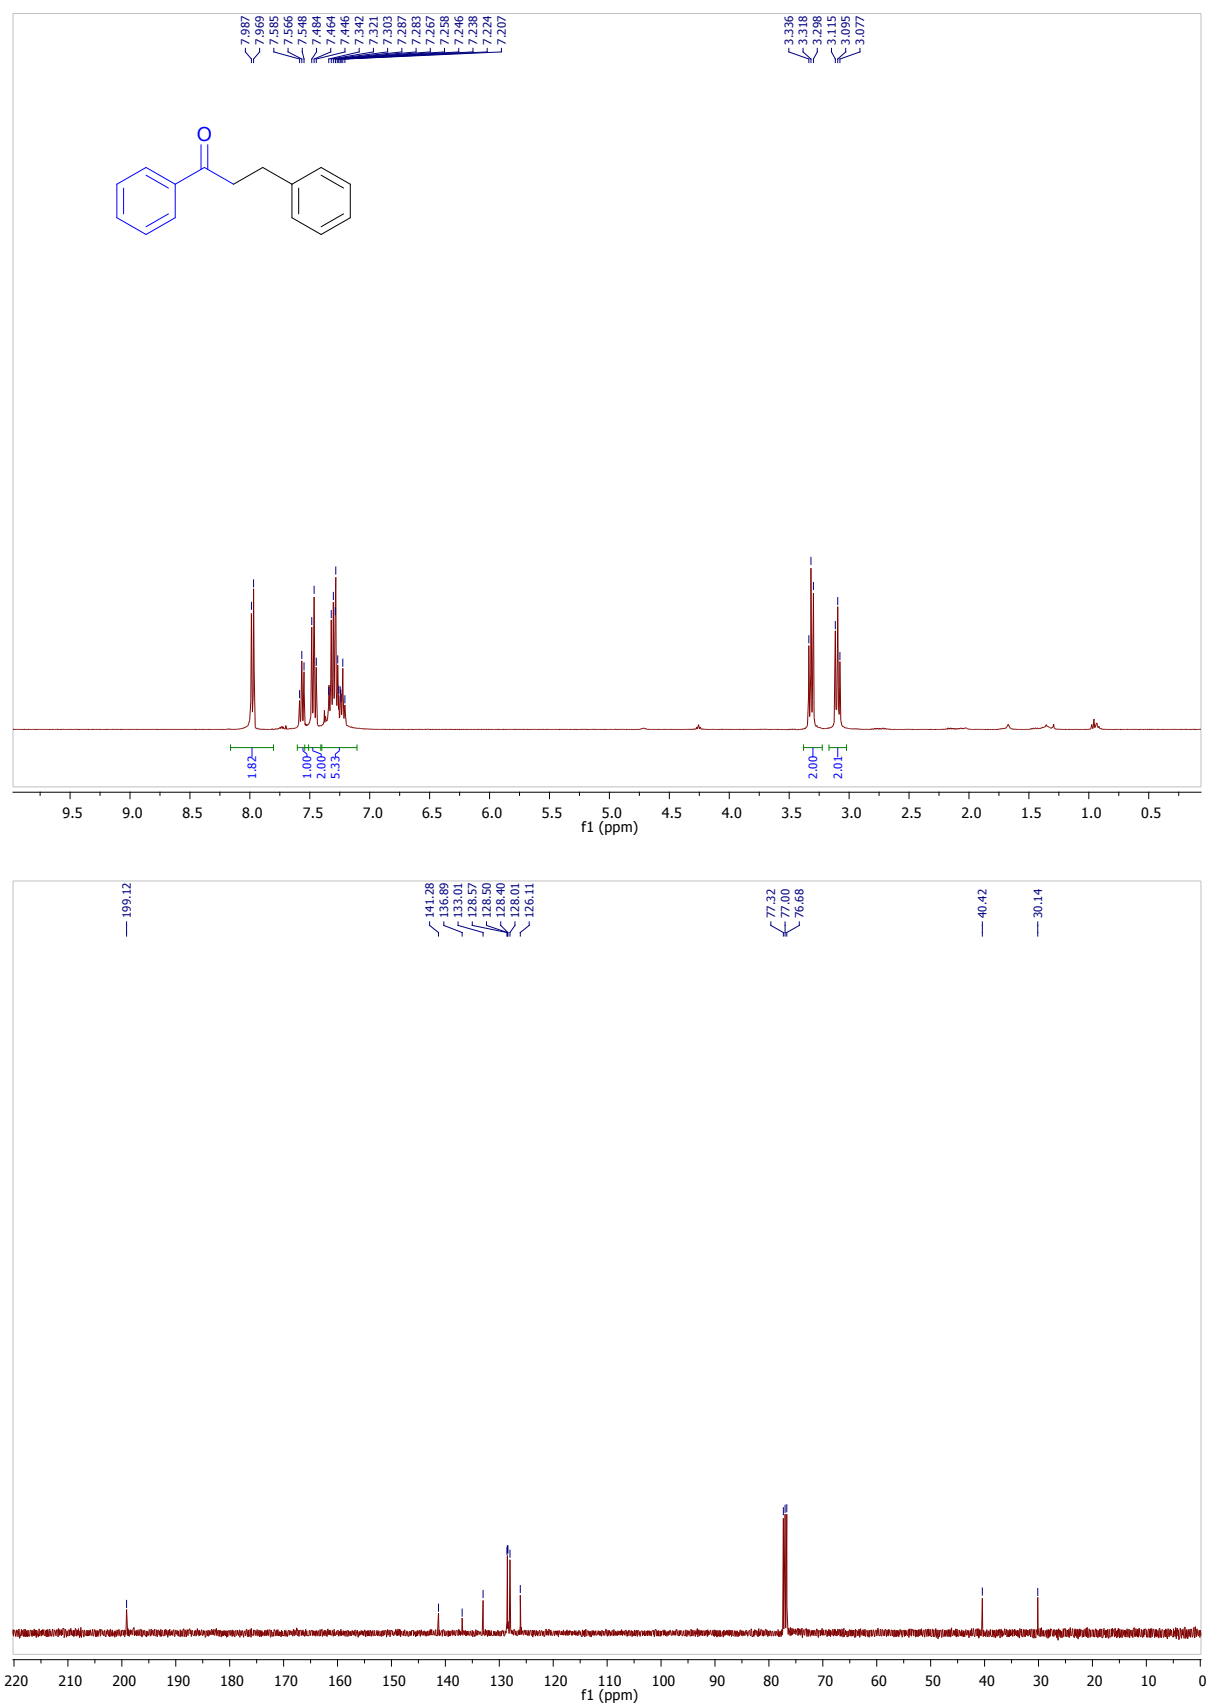

Figure S11.  $^1\text{H}$ - and  $^{13}\text{C}$ -NMR spectra of 1,3-diphenylpropan-1-one (22aa).

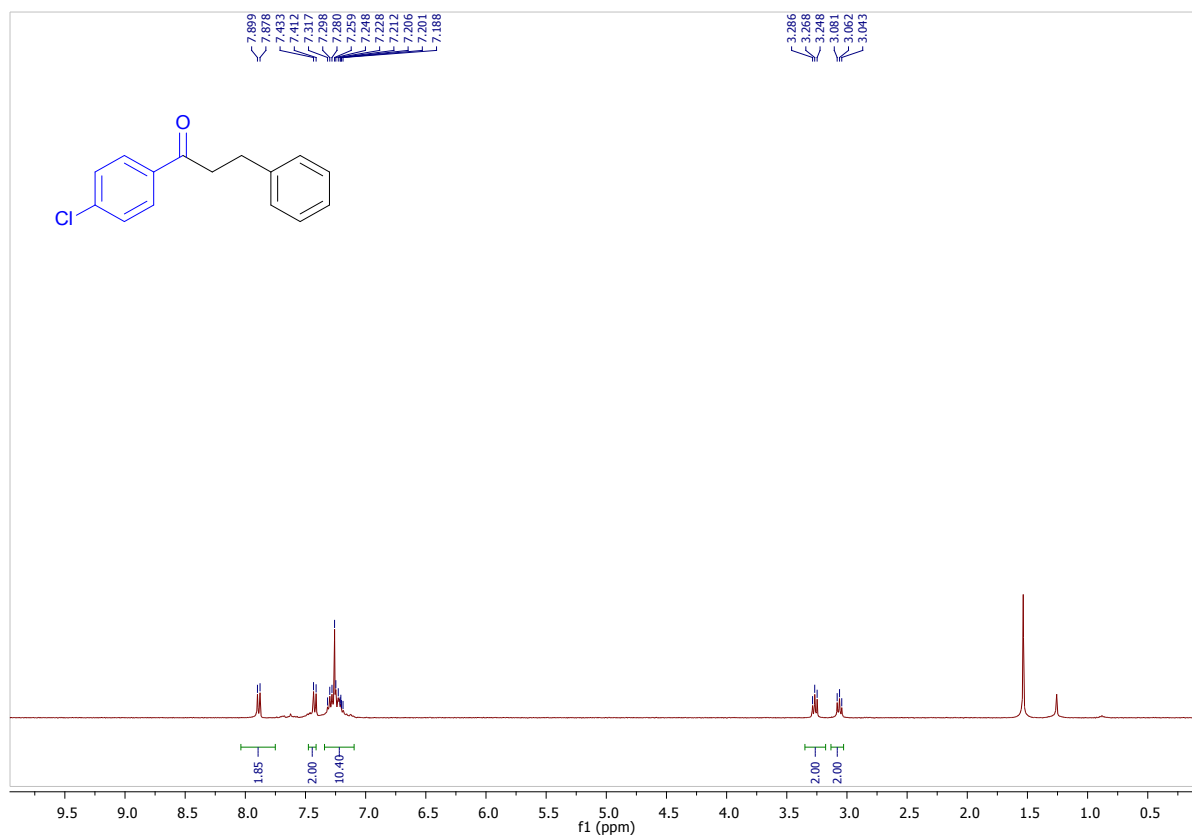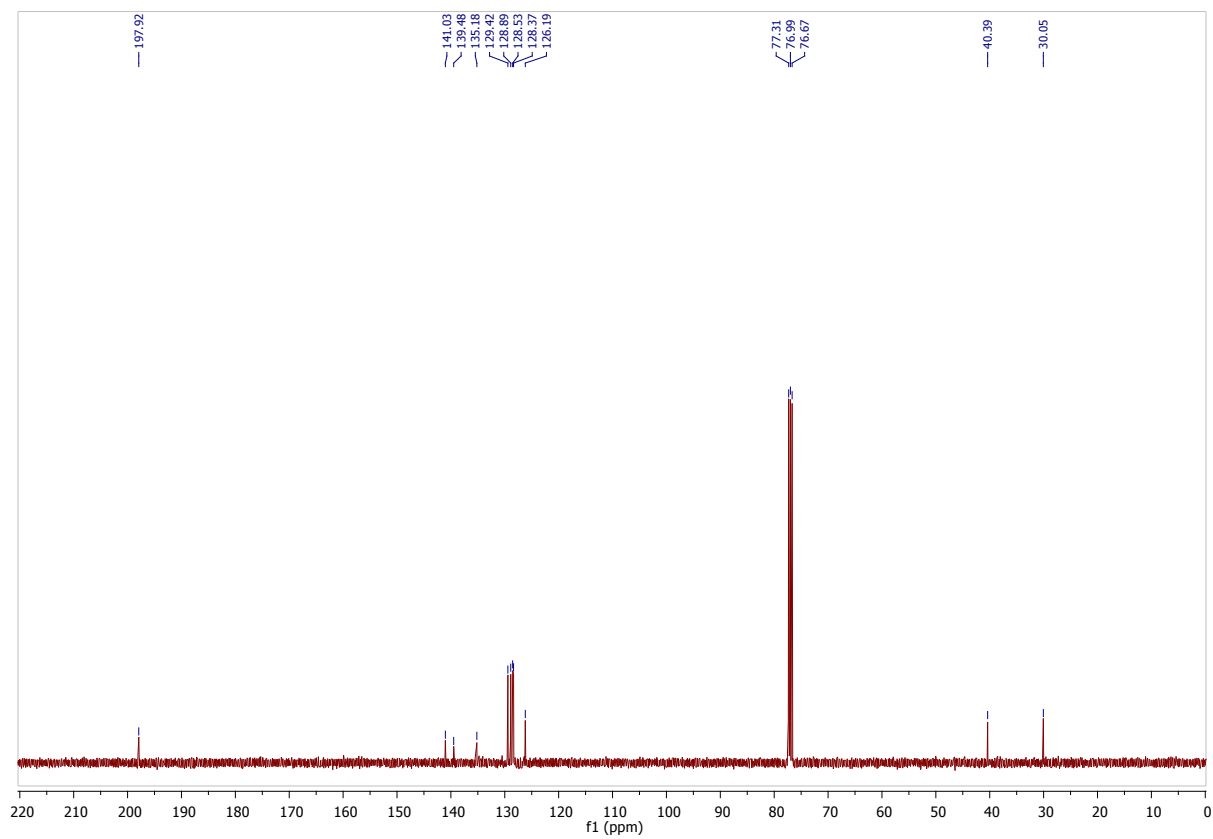

Figure S12. <sup>1</sup>H- and <sup>13</sup>C-NMR spectra of 1-(4-chlorophenyl)-3-phenylpropan-1-one (22ba).

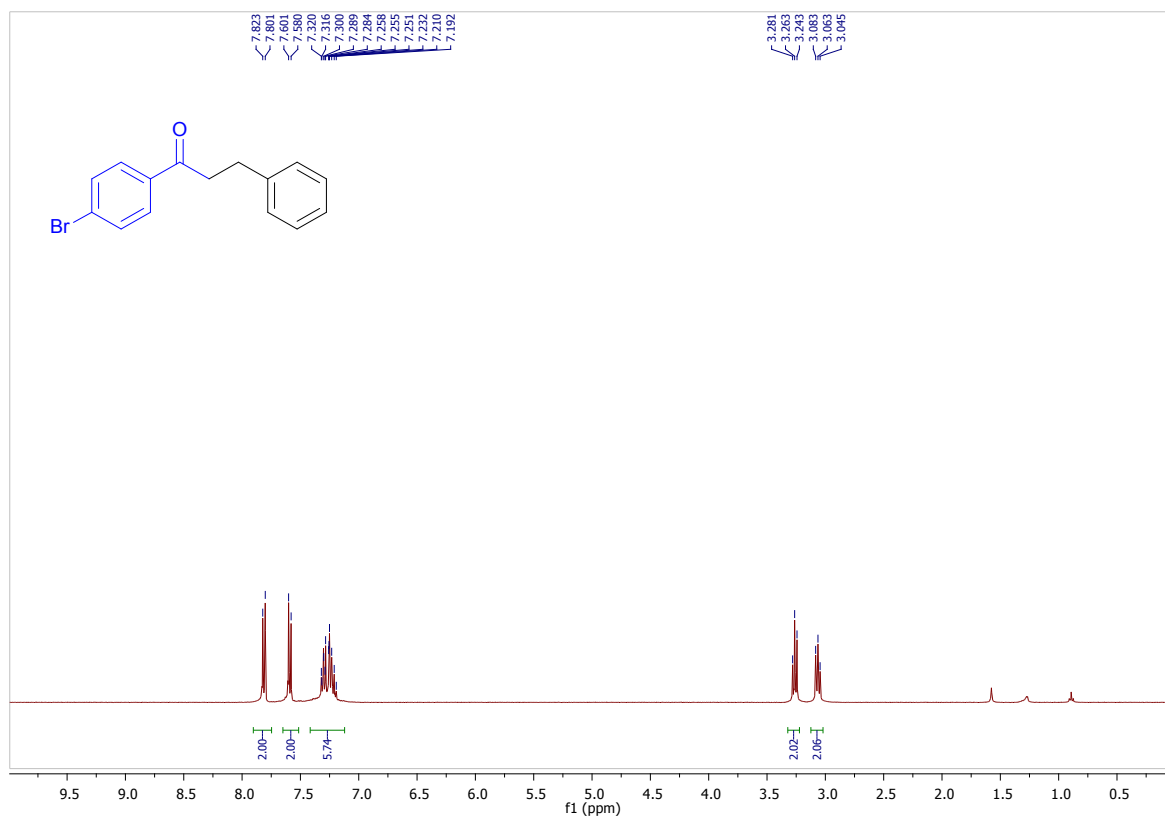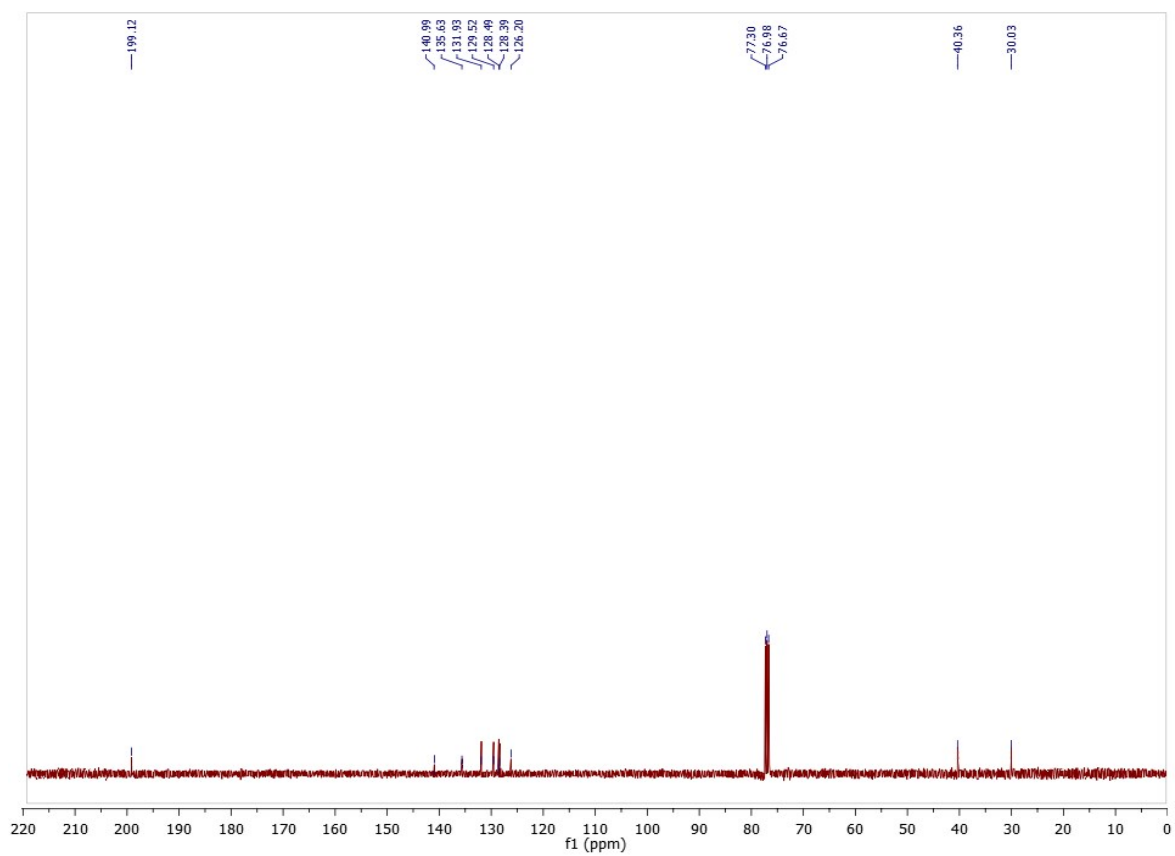

**Figure S13.** <sup>1</sup>H- and <sup>13</sup>C-NMR spectrums of 1-(4-bromophenyl)-3-phenylpropan-1-one (22da).

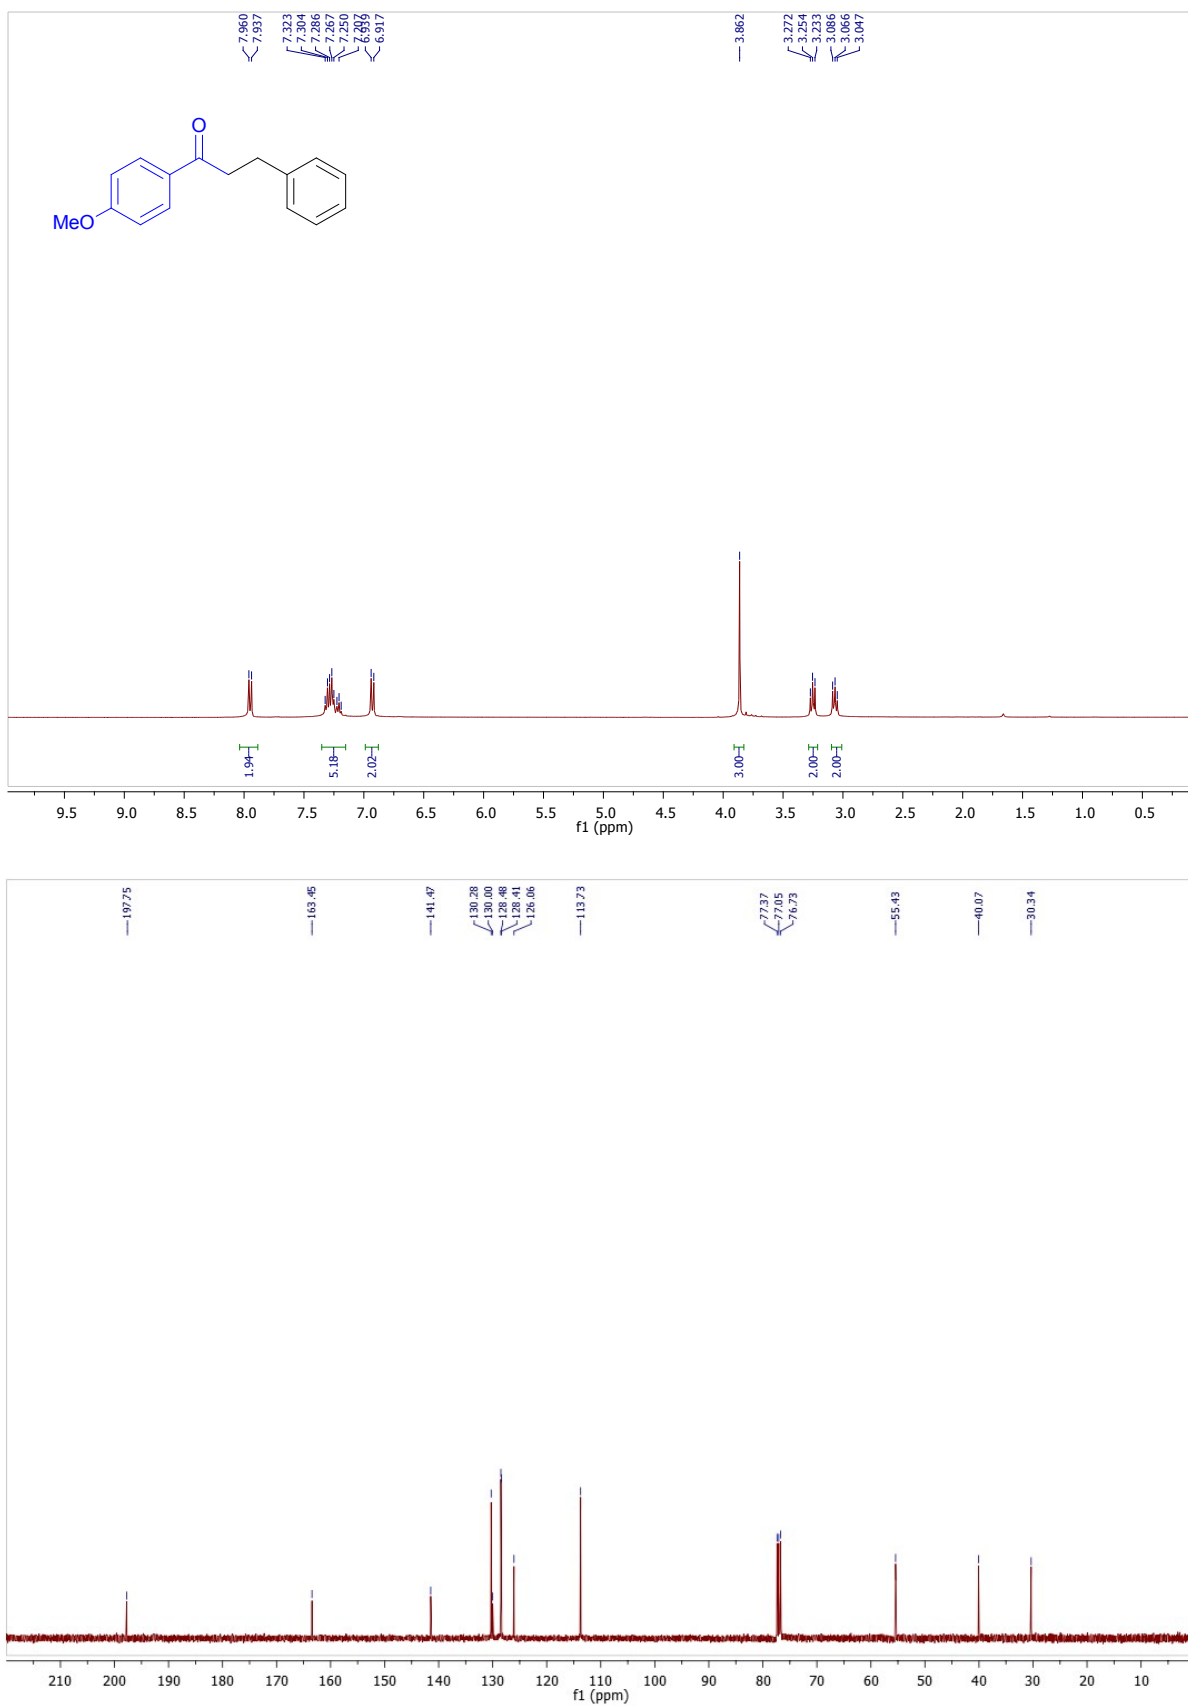

**Figure S14.** <sup>1</sup>H- and <sup>13</sup>C-NMR spectra of 1-(4-methoxyphenyl)-3-phenylpropan-1-one (22ea).

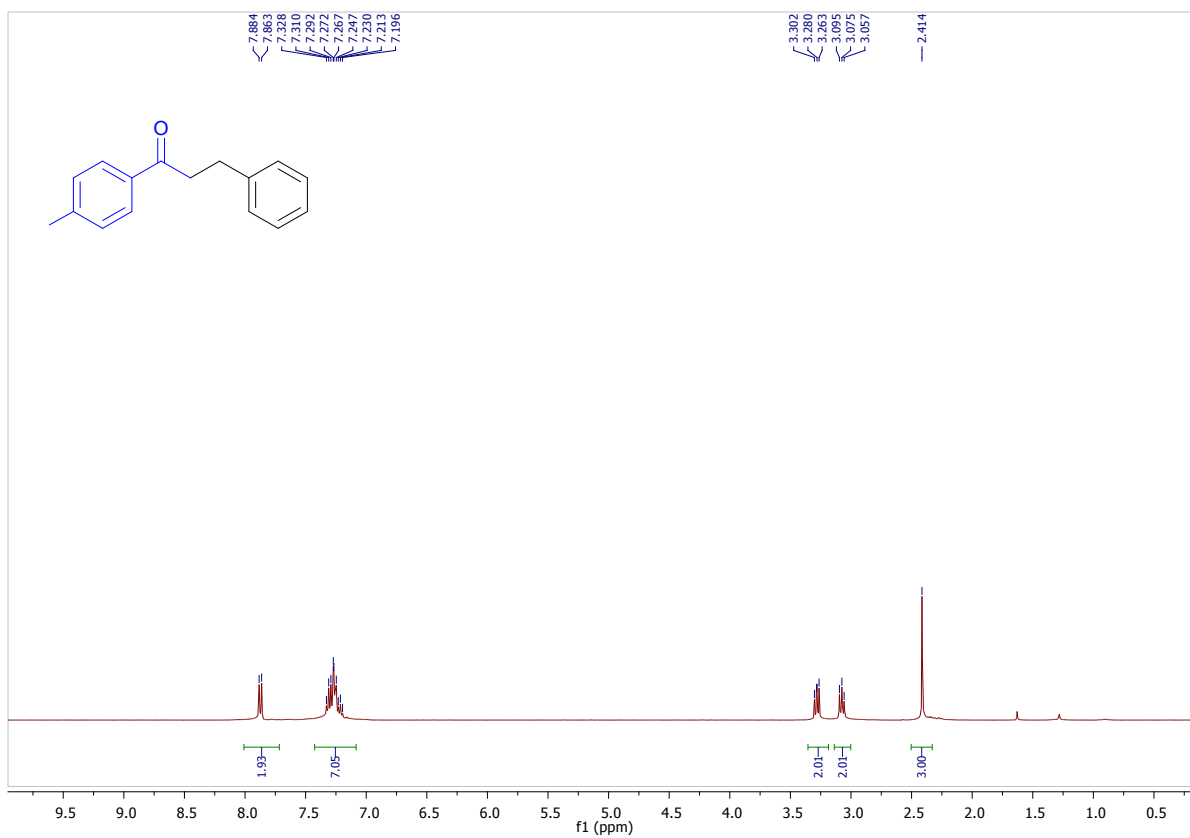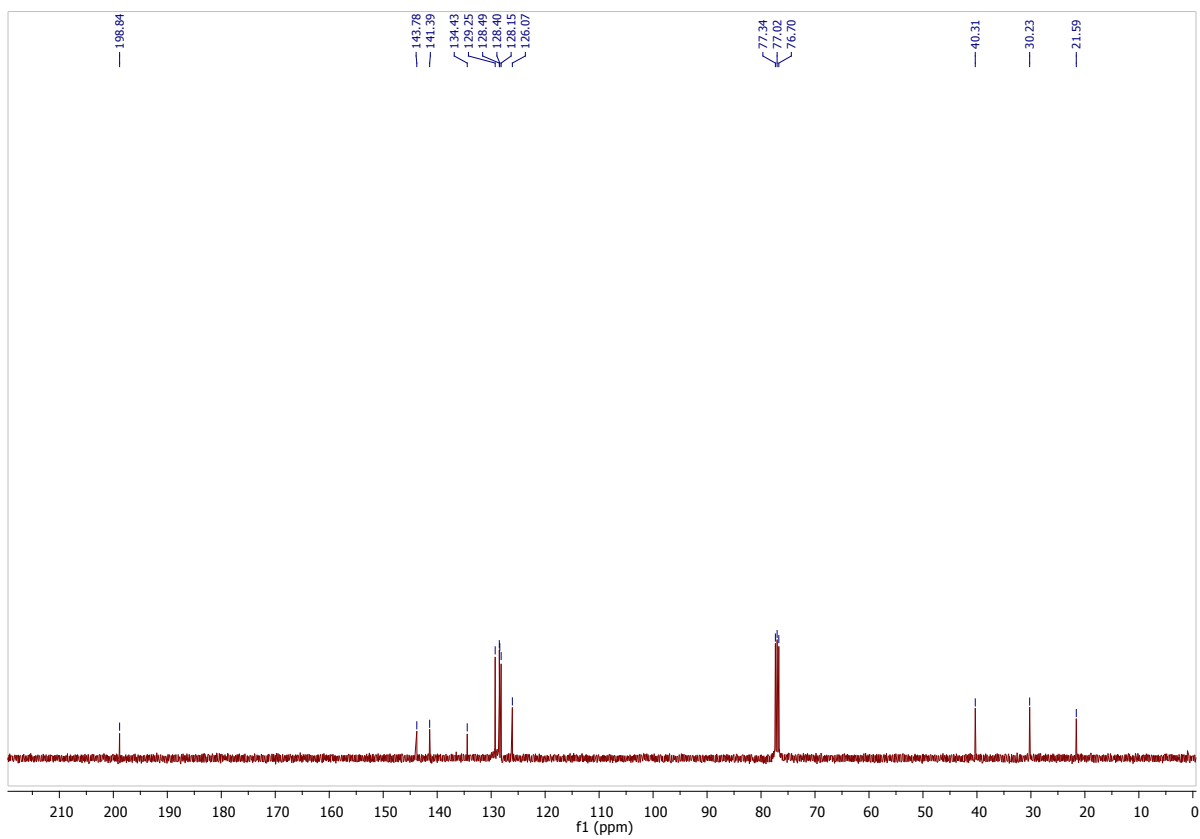

Figure S15. <sup>1</sup>H- and <sup>13</sup>C-NMR spectra of 1-(4-methylphenyl)-3-phenylpropan-1-one (**22fa**).



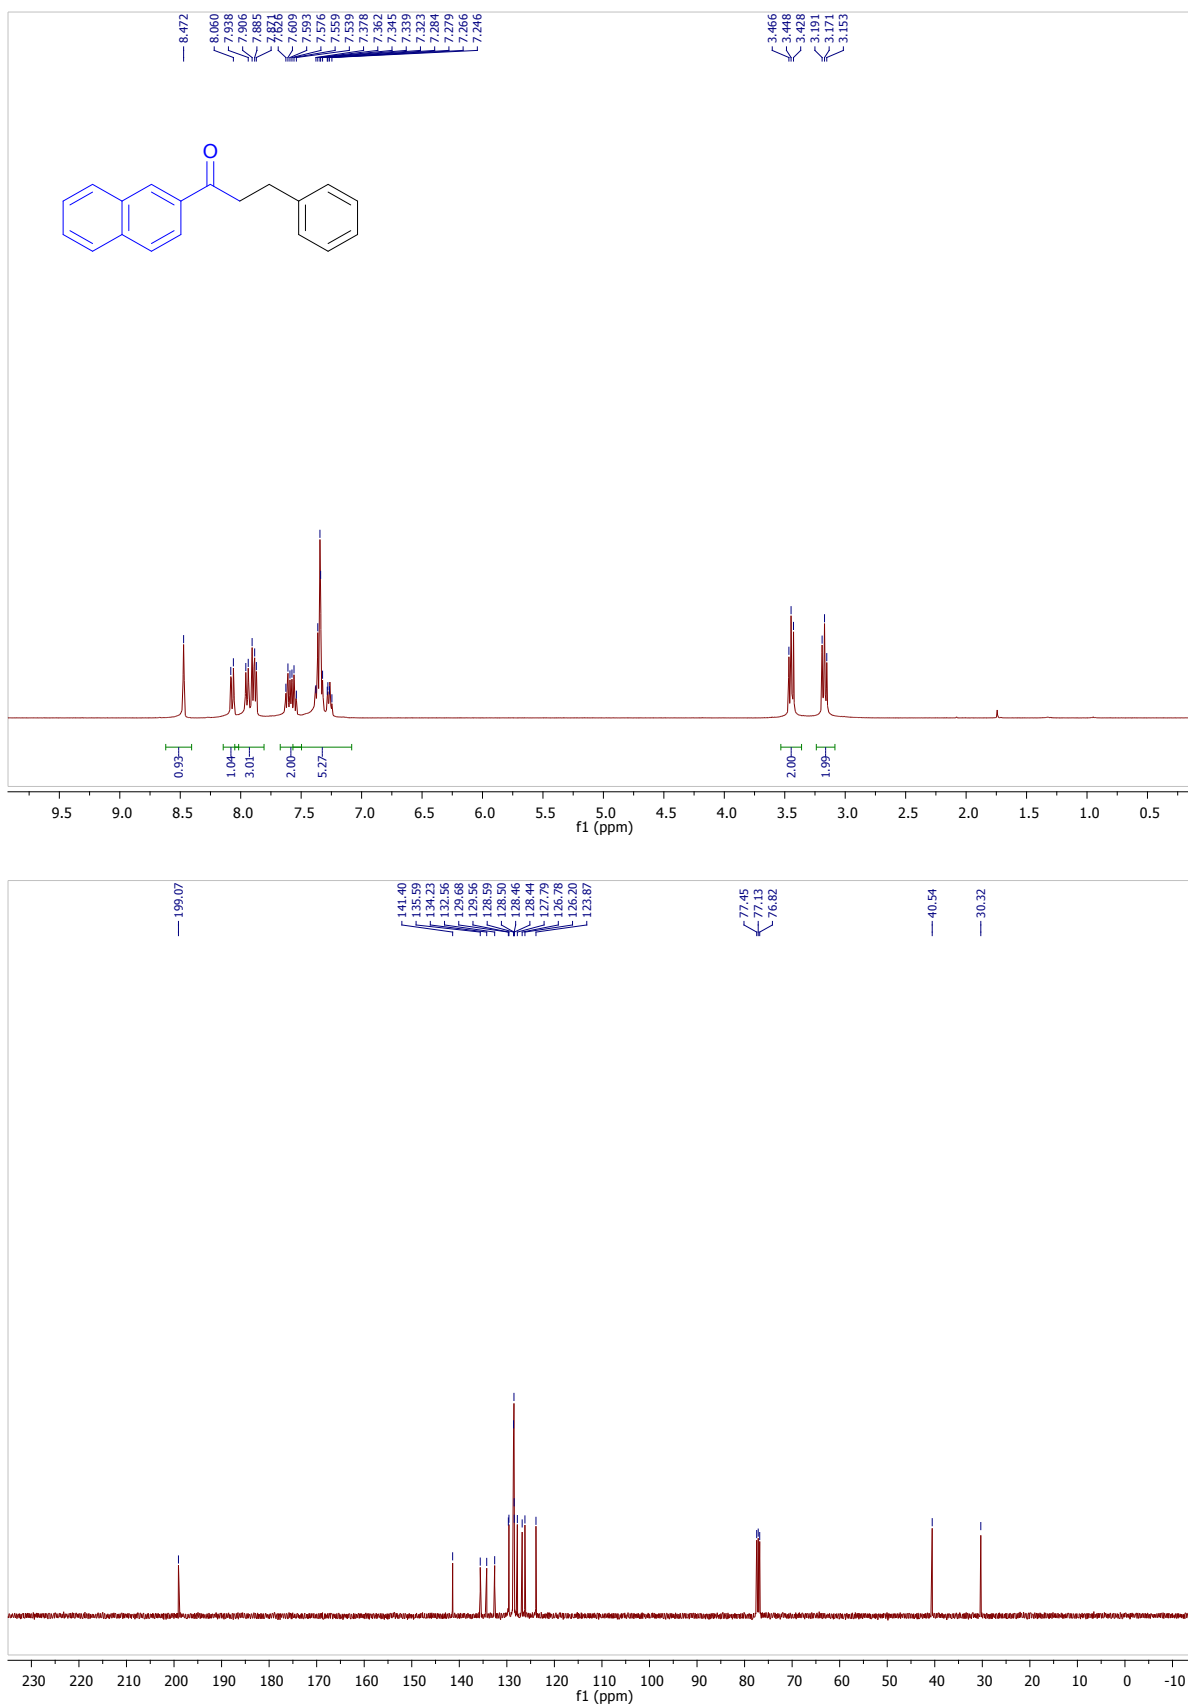

Figure S16. <sup>1</sup>H- and <sup>13</sup>C-NMR spectra of 1-(naphthalen-2-yl)-3-phenylpropan-1-one (**22ia**).

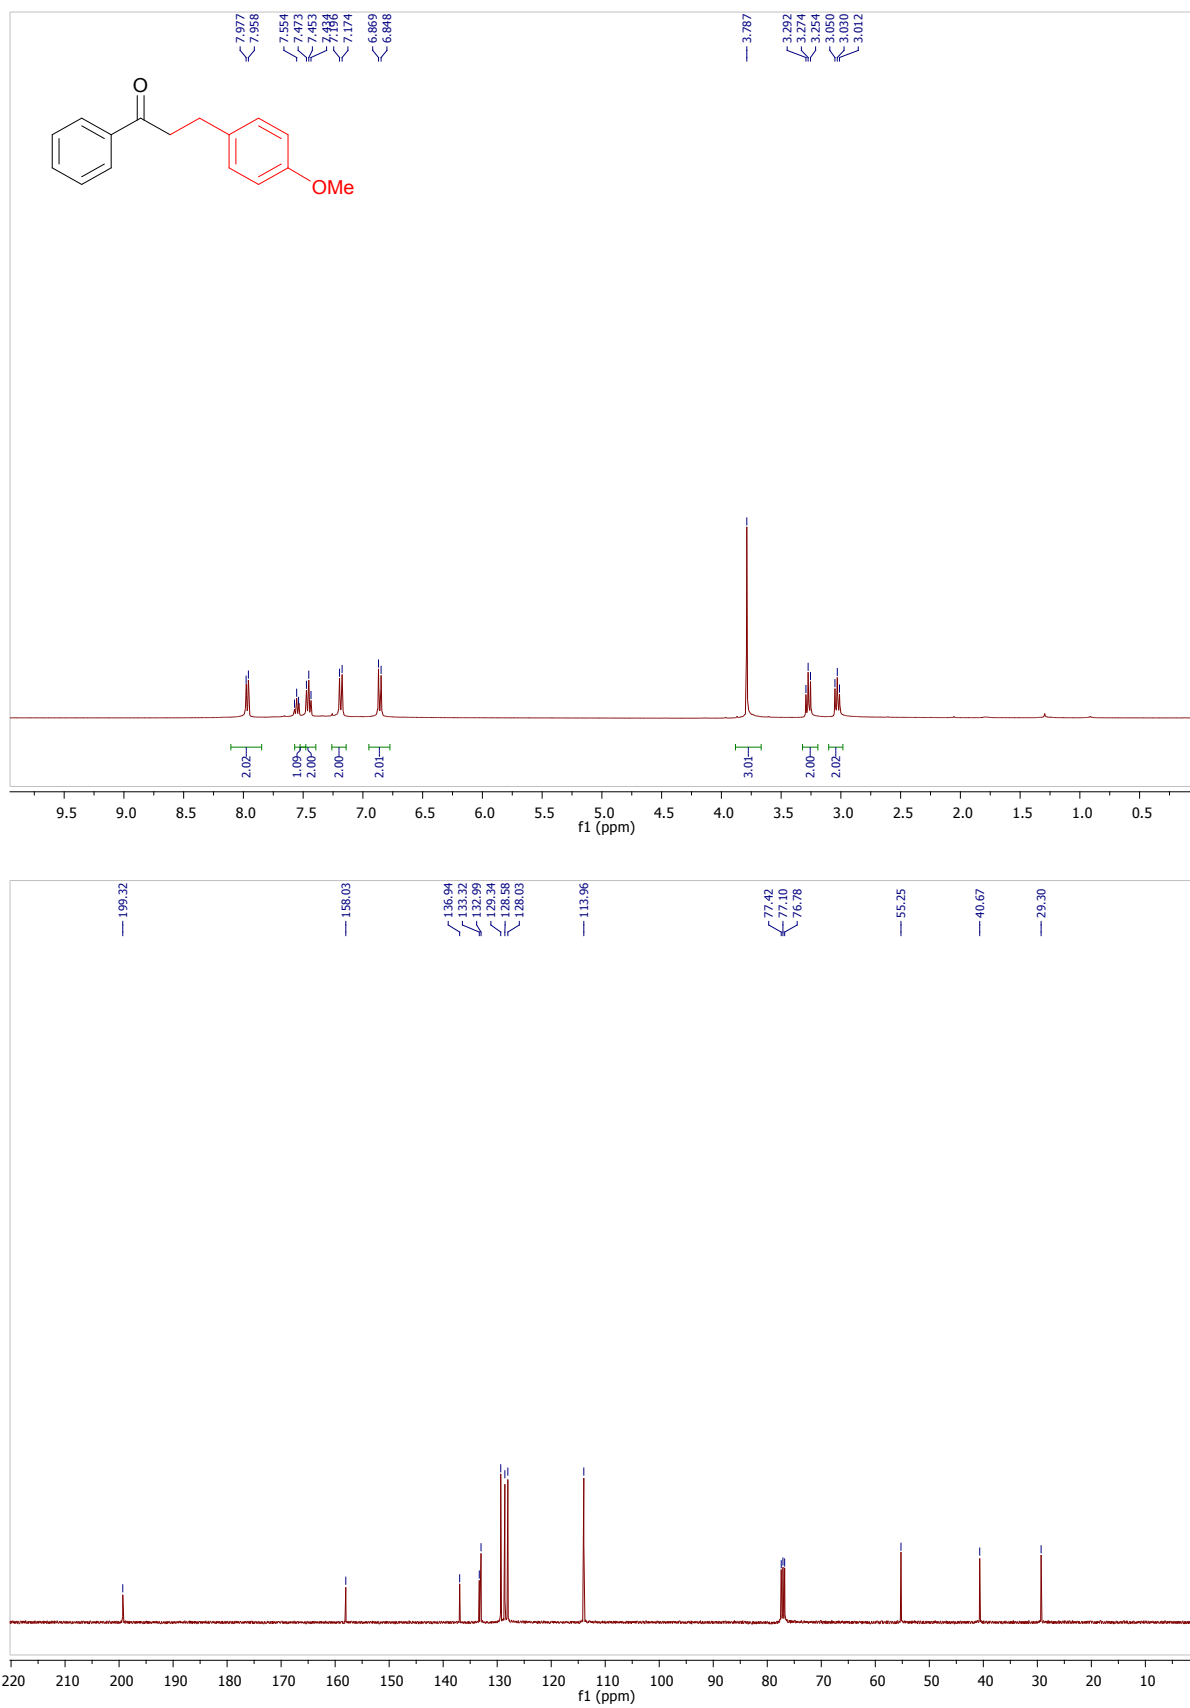

**Figure S17.** <sup>1</sup>H- and <sup>13</sup>C-NMR spectra of 3-(4-methoxyphenyl)-1-phenylpropan-1-one (22ab).

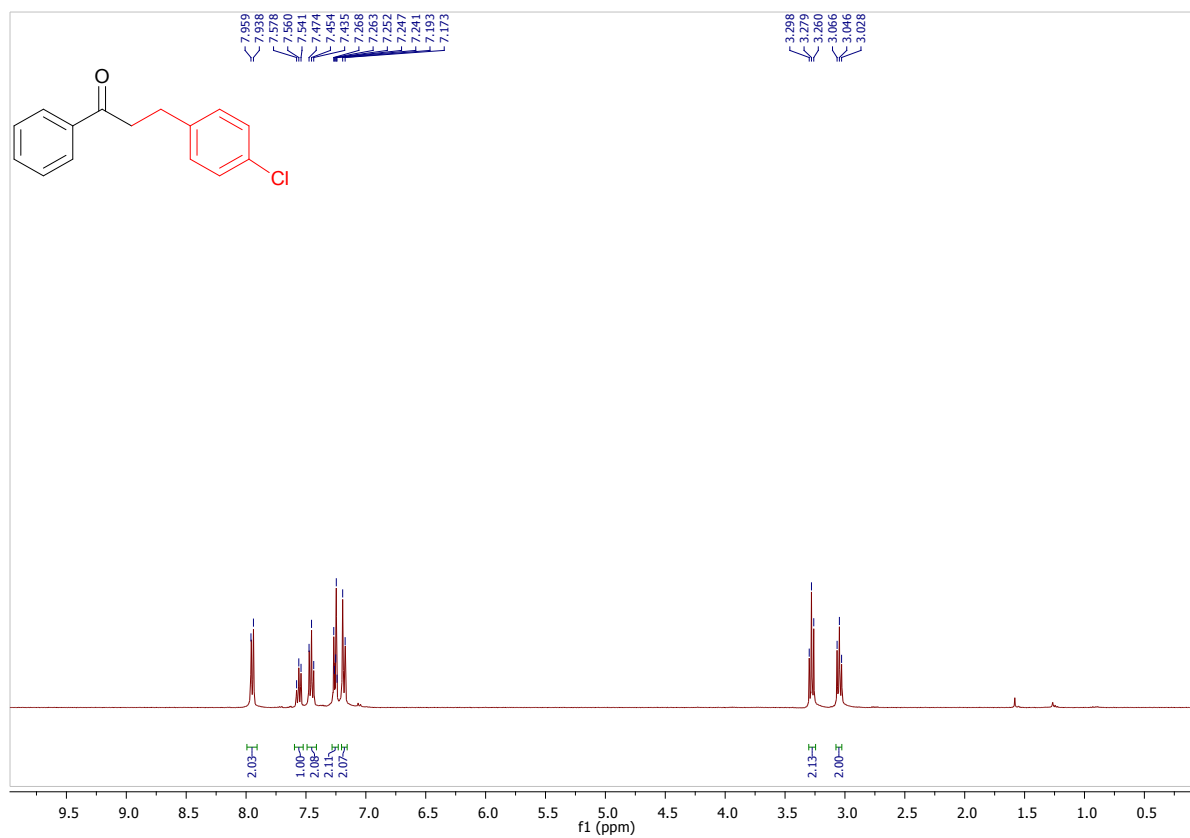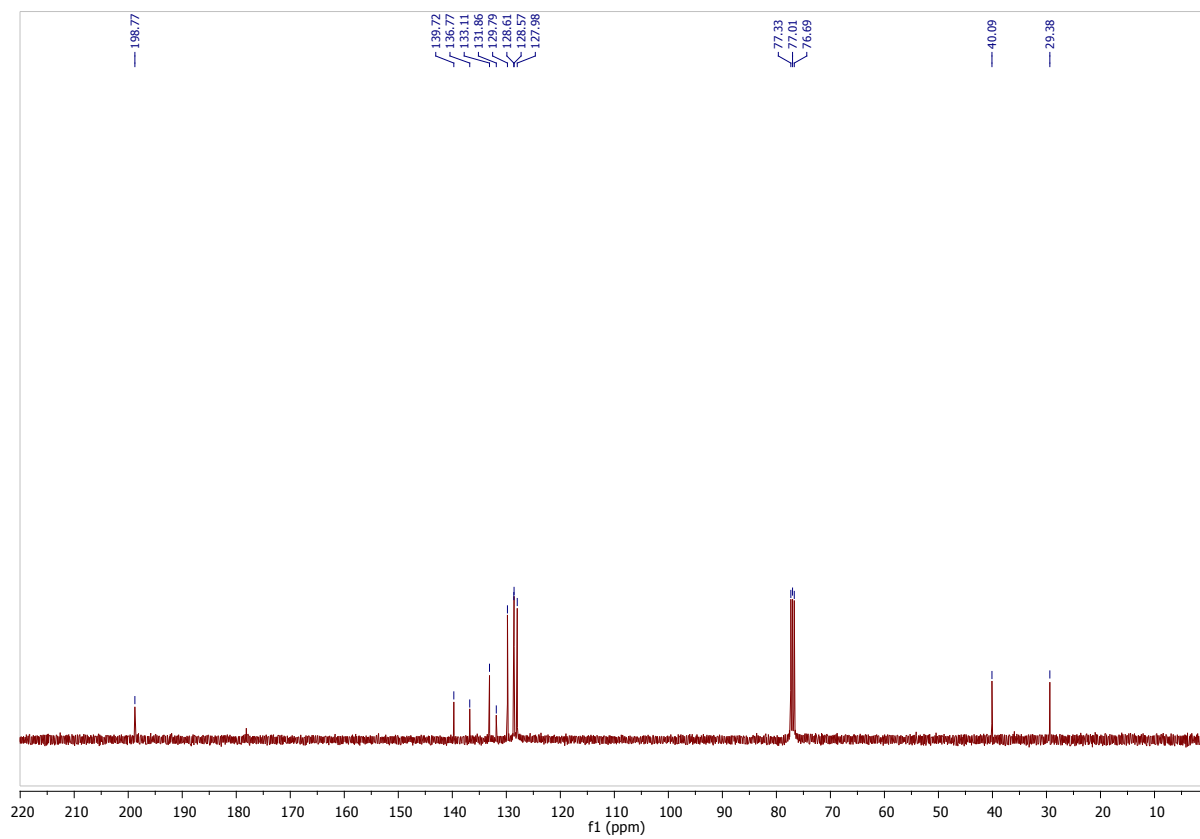

Figure S18. <sup>1</sup>H- and <sup>13</sup>C-NMR spectra of 3-(4-chlorophenyl)-1-phenylpropan-1-one (22af).

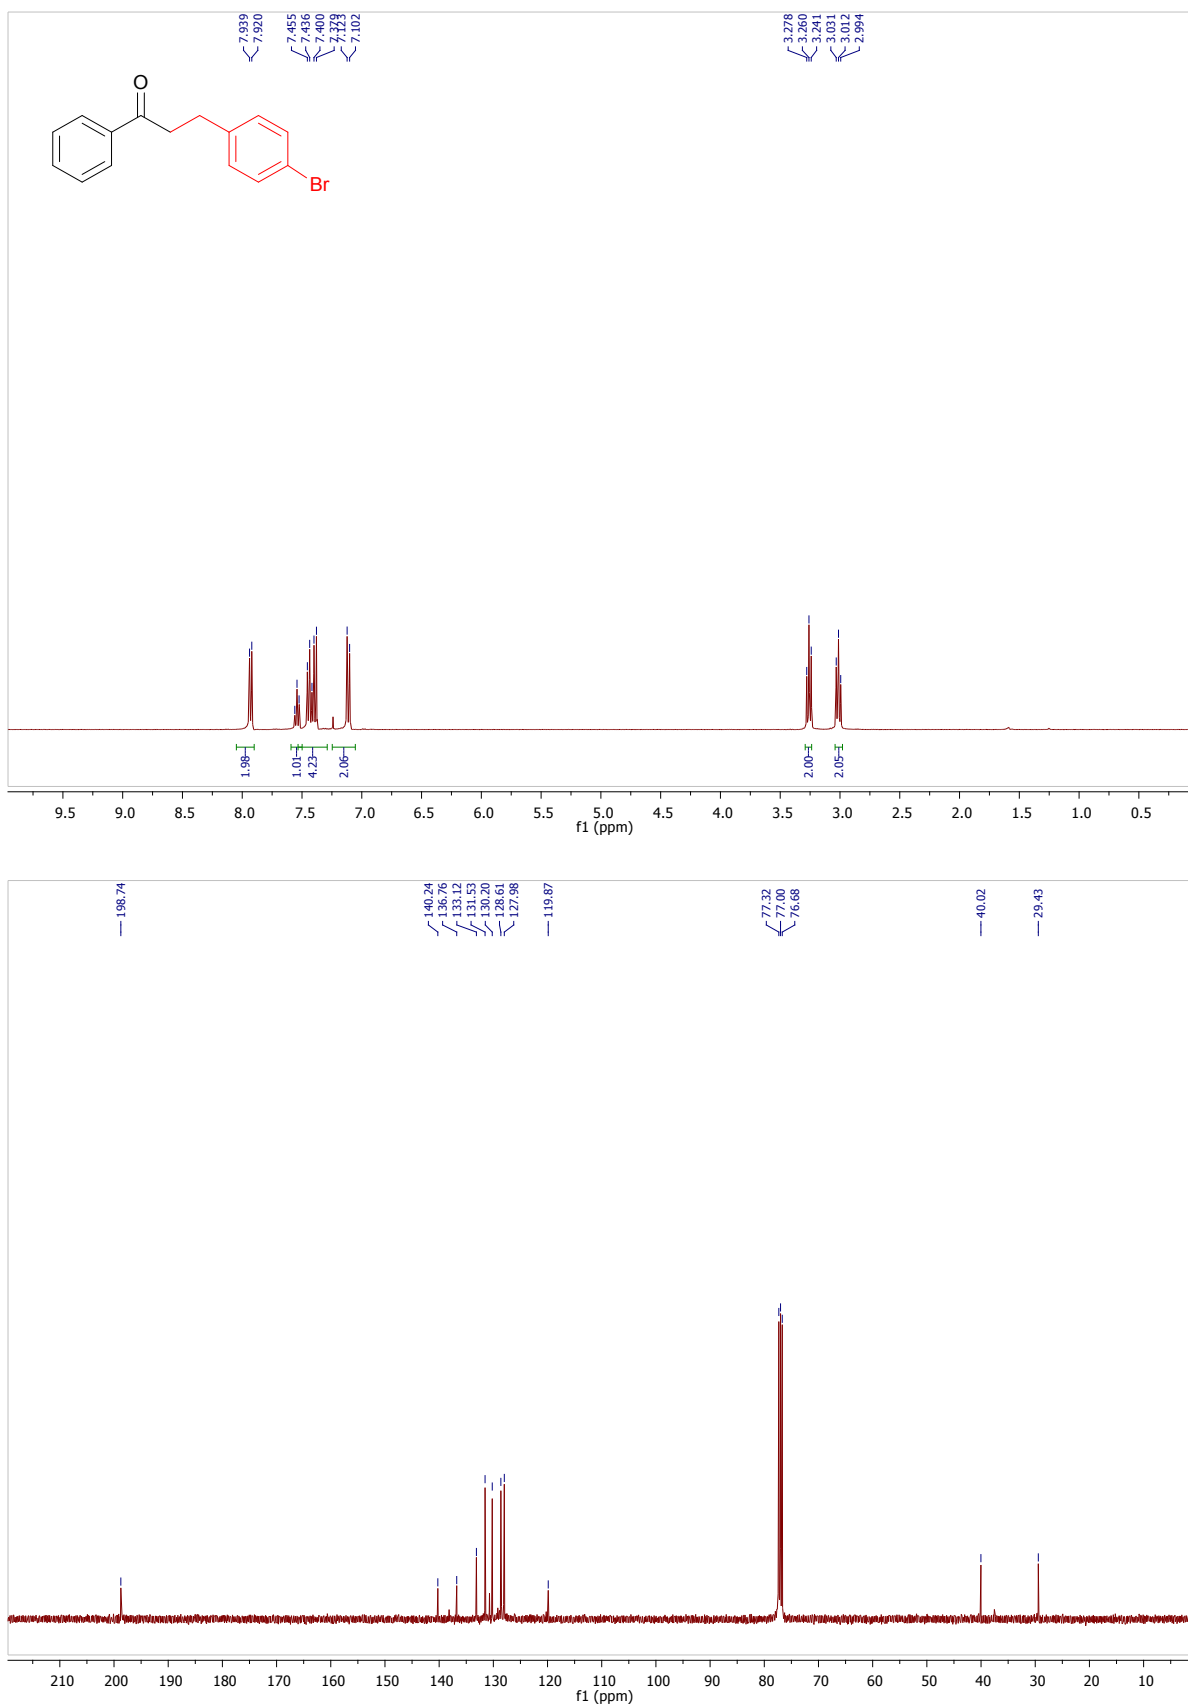

**Figure S19.** <sup>1</sup>H- and <sup>13</sup>C-NMR spectra of 3-(4-bromophenyl)-1-phenylpropan-1-one (22ah).

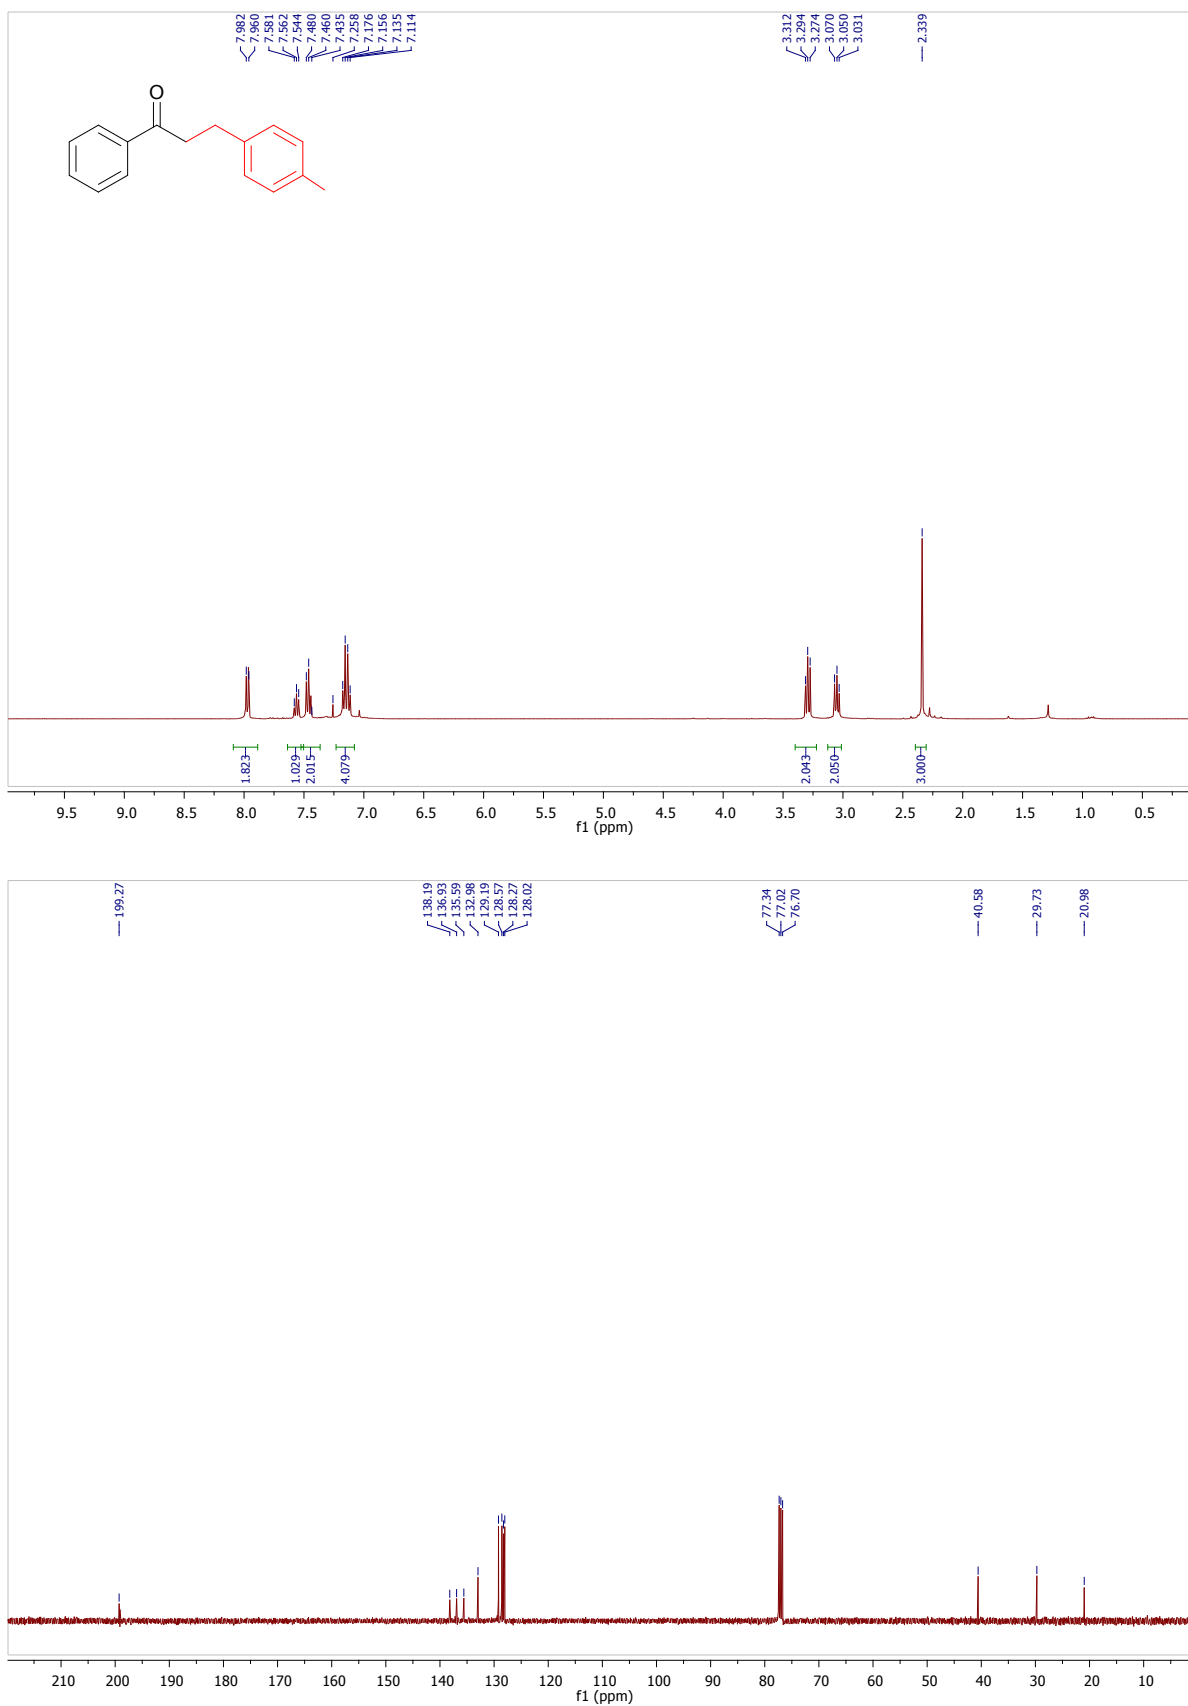

**Figure S20.** <sup>1</sup>H- and <sup>13</sup>C-NMR spectra of 3-(4-methylphenyl)-1-phenylpropan-1-one (22ad).

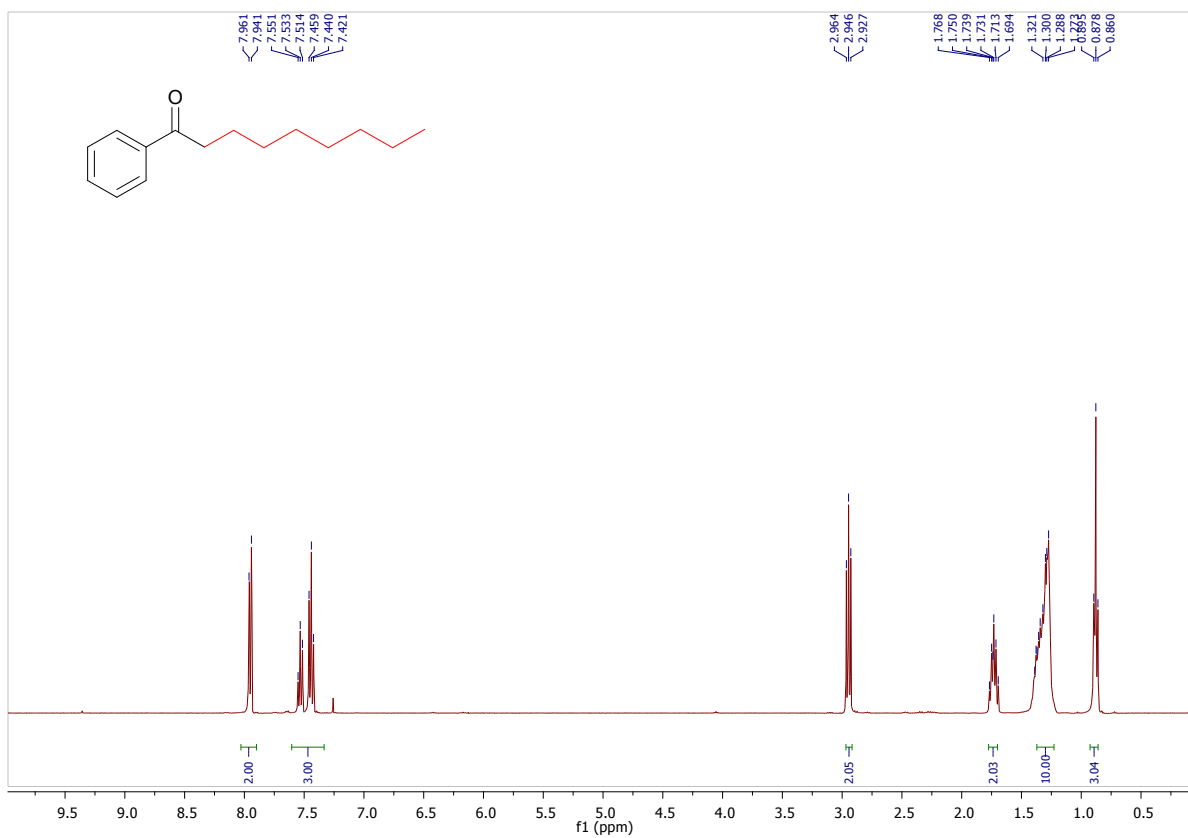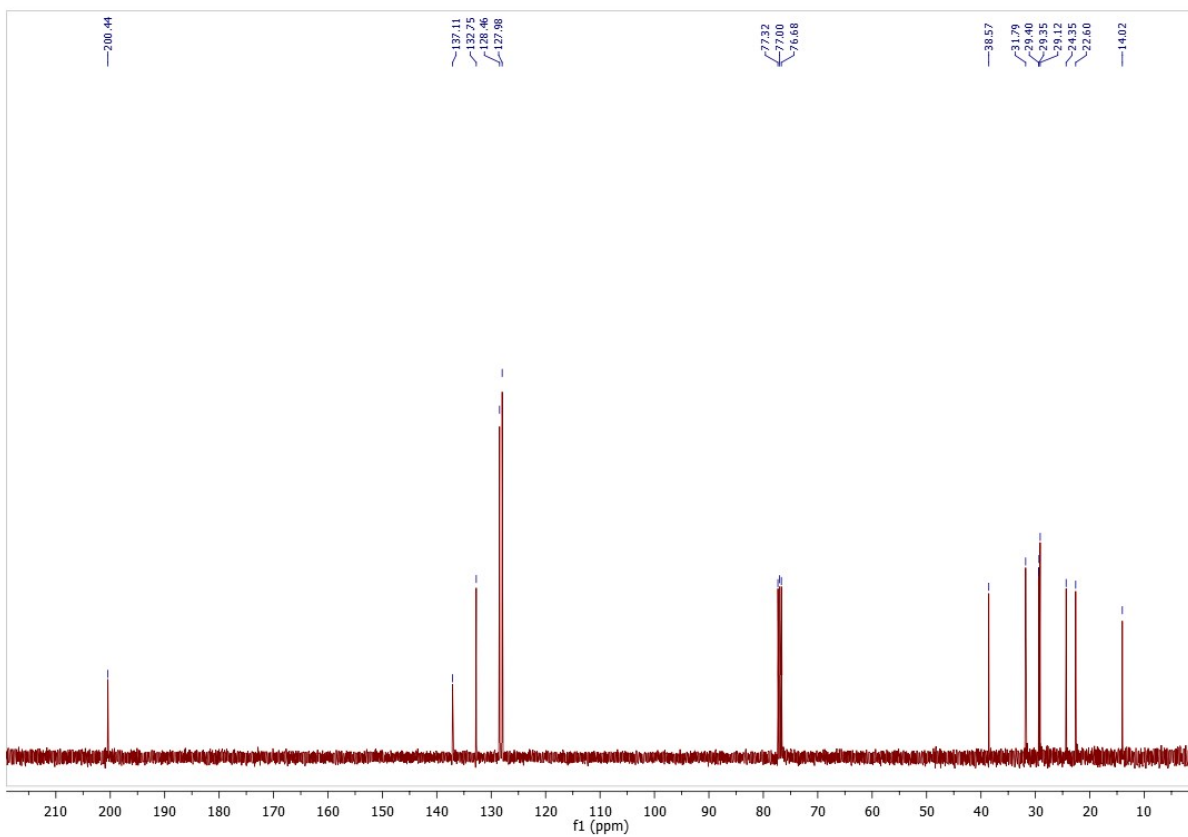

Figure S21. <sup>1</sup>H- and <sup>13</sup>C-NMR spectrums of 1-phenylnonan-1-one (22aj).

1,3-diphenylpropan-1-one (**22aa**). White solid, 90% yield.  $^1\text{H}$  NMR (400 MHz,  $\text{CDCl}_3$ ):  $\delta$  7.99 (d,  $J = 7.2$  Hz, 2 H, Ar- $H$ ), 7.56 (t,  $J = 7.2$  Hz, 1 H, Ar- $H$ ), 7.46 (t,  $J = 8.0$  Hz, 2 H, Ar- $H$ ), 7.30 (m, 5 H, Ar- $H$ ), 3.31 (t,  $J = 7.2$  Hz, 2 H,  $\text{CH}_2$ ), 3.09 (t,  $J = 8.0$  Hz, 2 H,  $\text{CH}_2$ ).  $^{13}\text{C}$  NMR (100 MHz,  $\text{CDCl}_3$ ):  $\delta$  199.1, 141.2, 136.8, 133.0, 128.5, 128.5, 128.4, 128.0, 126.1, 40.4, 30.1.

1-(4-chlorophenyl)-3-phenylpropan-1-one (**22ba**). White solid, 87% yield.  $^1\text{H}$  NMR (400 MHz,  $\text{CDCl}_3$ ):  $\delta$  7.88 (d,  $J = 8.4$  Hz, 2 H, Ar- $H$ ), 7.42 (d,  $J = 8.4$  Hz, 2 H, Ar- $H$ ), 7.24 (m, 5 H, Ar- $H$ ), 3.26 (t,  $J = 7.2$  Hz, 2 H,  $\text{CH}_2$ ), 3.06 (t,  $J = 7.6$  Hz, 2 H,  $\text{CH}_2$ ).  $^{13}\text{C}$  NMR (100 MHz,  $\text{CDCl}_3$ ):  $\delta$  197.9, 141.0, 139.4, 135.1, 129.4, 128.8, 128.5, 128.3, 126.1, 40.3, 30.0.

1-(4-bromophenyl)-3-phenylpropan-1-one (**22da**). White solid, 81% yield.  $^1\text{H}$  NMR (400 MHz,  $\text{CDCl}_3$ ):  $\delta$  7.81 (d,  $J = 8.8$  Hz, 2 H, Ar- $H$ ), 7.59 (d,  $J = 8.4$  Hz, 2 H, Ar- $H$ ), 7.25 (m, 5 H, Ar- $H$ ), 3.26 (t,  $J = 7.2$  Hz, 2 H,  $\text{CH}_2$ ), 3.06 (t,  $J = 8.0$  Hz, 2 H,  $\text{CH}_2$ ).  $^{13}\text{C}$  NMR (100 MHz,  $\text{CDCl}_3$ ):  $\delta$  199.1, 141.0, 135.5, 131.8, 129.5, 128.5, 128.3, 126.1, 40.3, 30.0.

1-(4-methoxyphenyl)-3-phenylpropan-1-one (**22ea**). White solid, 98% yield.  $^1\text{H}$  NMR (400 MHz,  $\text{CDCl}_3$ ):  $\delta$  7.95 (d,  $J = 9.2$  Hz, 2 H, Ar- $H$ ), 7.26 (m, 5 H, Ar- $H$ ), 6.93 (d,  $J = 8.8$  Hz, 2 H, Ar- $H$ ), 3.86 (s, 3 H,  $\text{OCH}_3$ ), 3.25 (t,  $J = 7.2$  Hz, 2 H,  $\text{CH}_2$ ), 3.06 (t,  $J = 8.4$  Hz, 2 H,  $\text{CH}_2$ ).  $^{13}\text{C}$  NMR (100 MHz,  $\text{CDCl}_3$ ):  $\delta$  197.7, 163.4, 141.4, 130.2, 130.0, 128.4, 128.4, 126.0, 113.7, 55.4, 40.0, 30.3.

1-(4-methylphenyl)-3-phenylpropan-1-one (**22fa**). White solid, 91% yield.  $^1\text{H}$  NMR (400 MHz,  $\text{CDCl}_3$ ):  $\delta$  7.87 (d,  $J = 8.4$  Hz, 2 H, Ar- $H$ ), 7.27 (m, 7 H, Ar- $H$ ), 3.28 (t,  $J = 7.2$  Hz, 2 H,  $\text{CH}_2$ ), 3.07 (t,  $J = 8.0$  Hz, 2 H,  $\text{CH}_2$ ), 2.41 (s, 3 H,  $\text{CH}_3$ ).  $^{13}\text{C}$  NMR (100 MHz,  $\text{CDCl}_3$ ):  $\delta$  198.8, 143.7, 141.3, 134.3, 129.2, 128.4, 128.4, 128.1, 126.0, 40.3, 30.2, 21.5.

1-(2-naphthyl)-3-phenylpropan-1-one (**22ia**). White solid, 87% yield.  $^1\text{H}$  NMR (400 MHz,  $\text{CDCl}_3$ ):  $\delta$  8.47 (s, 1 H, Ar- $H$ ), 8.07 (d,  $J = 8.4$  Hz, 1 H, Ar- $H$ ), 7.92 (m, 3 H, Ar- $H$ ), 7.59 (m, 2 H, Ar- $H$ ), 7.33 (m, 5 H, Ar- $H$ ), 3.44 (t,  $J = 7.2$  Hz, 2 H,  $\text{CH}_2$ ), 3.17 (t,  $J = 8.0$  Hz, 2 H,  $\text{CH}_2$ ).  $^{13}\text{C}$  NMR (100 MHz,  $\text{CDCl}_3$ ):  $\delta$  199.0, 141.4, 135.5, 134.2, 132.5, 129.6, 129.5, 128.5, 128.5, 128.4, 128.4, 127.7, 126.7, 126.2, 123.8, 40.5, 30.3.

3-(4-methoxyphenyl)-1-phenylpropan-1-one (**22ab**). White solid; 97% yield.  $^1\text{H}$  NMR (400 MHz,  $\text{CDCl}_3$ ):  $\delta$  7.96 (d,  $J = 7.6$  Hz, 2 H, Ar- $H$ ), 7.55 (t,  $J = 7.2$  Hz, 1 H, Ar- $H$ ), 7.45 (t,  $J = 8.0$  Hz, 2 H, Ar- $H$ ), 7.18 (d,  $J = 8.8$  Hz, 2 H, Ar- $H$ ), 6.85 (d,  $J = 8.4$  Hz, 2 H, Ar- $H$ ), 3.78 (s, 3 H,  $\text{CH}_3$ ), 3.27 (t,  $J = 7.2$  Hz, 2 H,  $\text{CH}_2$ ), 3.03 (t,  $J = 8.0$  Hz, 2 H,  $\text{CH}_2$ ).  $^{13}\text{C}$  NMR (100

MHz, CDCl<sub>3</sub>):  $\delta$  199.3, 158.0, 136.9, 133.3, 132.9, 129.3, 128.5, 128.0, 113.3, 55.2, 40.6, 29.3.

*3-(4-chlorophenyl)-1-phenylpropan-1-one (22af)*. White solid; 88% yield. <sup>1</sup>H NMR (400 MHz, CDCl<sub>3</sub>):  $\delta$  7.94 (d, *J* = 8.4 Hz, 2 H, Ar-*H*), 7.56 (t, *J* = 7.2 Hz, 1 H, Ar-*H*), 7.45 (t, *J* = 8.0 Hz, 2 H, Ar-*H*), 7.25 (m, 1 H, Ar-*H*), 7.18 (d, *J* = 8.4 Hz, 2 H, Ar-*H*), 3.28 (t, *J* = 7.2 Hz, 2 H, CH<sub>2</sub>), 3.04 (t, *J* = 7.6 Hz, 2 H, CH<sub>2</sub>). <sup>13</sup>C NMR (100 MHz, CDCl<sub>3</sub>):  $\delta$  198.7, 139.7, 136.7, 133.1, 131.8, 129.7, 128.6, 128.5, 127.9, 40.0, 29.3.

*3-(4-bromophenyl)-1-phenylpropan-1-one (22ah)*. Yellow oil; 82% yield. <sup>1</sup>H NMR (400 MHz, CDCl<sub>3</sub>):  $\delta$  7.95 (d, *J* = 1.2-8.0 Hz, 2 H, Ar-*H*), 7.56 (t, *J* = 7.2 Hz, 1 H, Ar-*H*), 7.43 (m, 4 H, Ar-*H*), 7.13 (d, *J* = 7.2 Hz, 2 H, Ar-*H*), 3.27 (t, *J* = 6.8 Hz, 2 H, CH<sub>2</sub>), 3.03 (t, *J* = 7.6 Hz, 2 H, CH<sub>2</sub>). <sup>13</sup>C NMR (100 MHz, CDCl<sub>3</sub>):  $\delta$  198.7, 140.2, 136.7, 133.1, 131.5, 130.2, 128.6, 128.0, 119.9, 40.0, 29.4.

*3-(4-methylphenyl)-1-phenylpropan-1-one (22ad)*. White solid; 85% yield. <sup>1</sup>H NMR (400 MHz, CDCl<sub>3</sub>):  $\delta$  7.97 (d, *J* = 7.2 Hz, 2 H, Ar-*H*), 7.56 (t, *J* = 7.2 Hz, 1 H, Ar-*H*), 7.46 (t, *J* = 7.6 Hz, 2 H, Ar-*H*), 7.15 (q, 4 H, Ar-*H*), 3.29 (t, *J* = 7.6 Hz, 2 H, CH<sub>2</sub>), 3.05 (t, *J* = 8.0 Hz, 2 H, CH<sub>2</sub>), 2.33 (s, 3 H, CH<sub>3</sub>). <sup>13</sup>C NMR (100 MHz, CDCl<sub>3</sub>):  $\delta$  199.2, 138.1, 136.9, 135.5, 132.9, 129.1, 128.5, 128.0, 40.5, 29.7, 20.9.

*1-phenyldecan-1-one (22aj)*. Yellow oil, 72% yield. <sup>1</sup>H NMR (400 MHz, 303 K, CDCl<sub>3</sub>):  $\delta$  7.96 (d, *J* = 8.8 Hz, 2 H, Ar-*H*), 7.55 (t, *J* = 7.2 Hz, 1 H, Ar-*H*), 7.47 (t, *J* = 7.6 Hz, 2 H, Ar-*H*), 2.96 (d, *J* = 7.4 Hz, 2 H, CH<sub>2</sub>), 1.75 (m, 2 H, CH<sub>2</sub>), 1.29 (m, 12 H, CH<sub>2</sub>), 0.89 (t, *J* = 7.0 Hz, 3 H, CH<sub>3</sub>). <sup>13</sup>C NMR (100 MHz, CDCl<sub>3</sub>):  $\delta$  200.5, 137.2, 132.8, 128.5, 128.0, 38.6, 31.9, 29.5, 29.4, 29.3, 24.4, 22.7, 14.1.



## $^1\text{H}$ and $^{13}\text{C}$ NMR spectra of Suzuki products

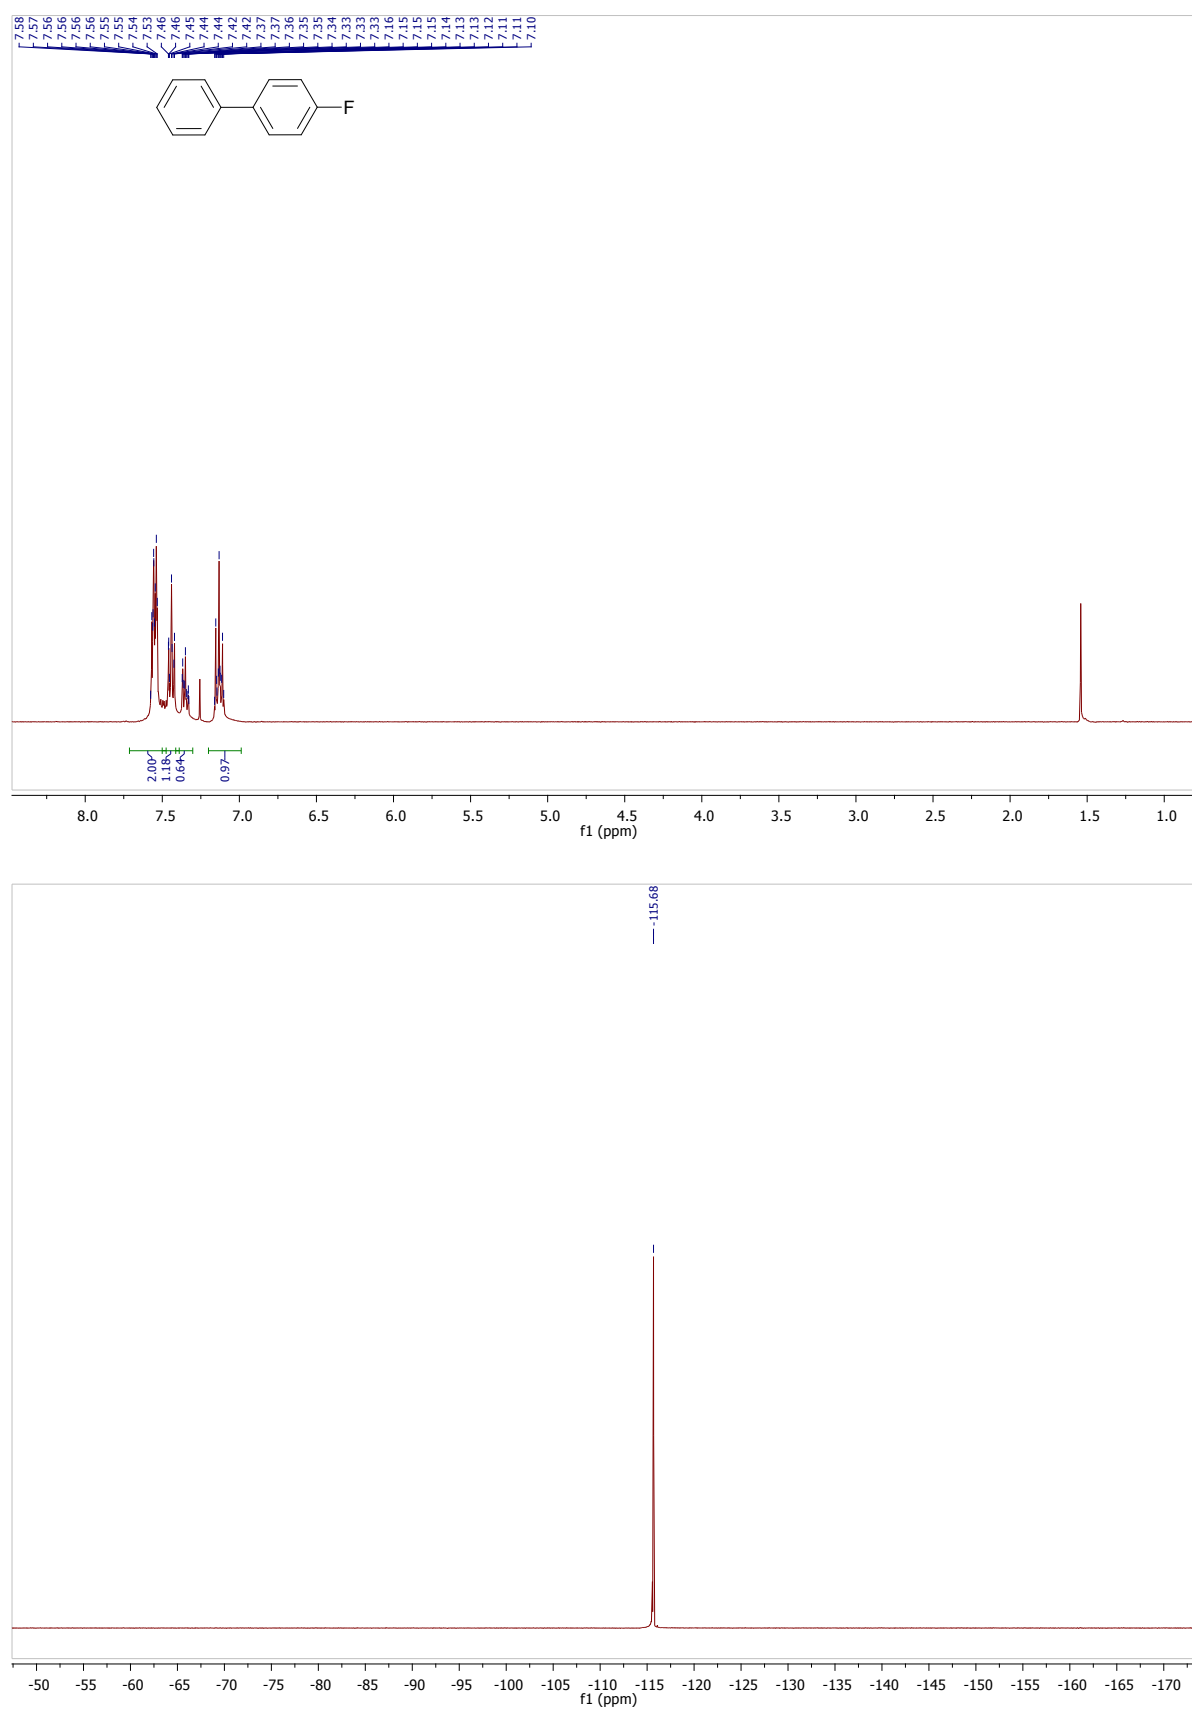

Figure S22.  $^1\text{H}$ -,  $^{13}\text{C}$ - and  $^{19}\text{F}$ -NMR spectra of 4-fluoro-1,1'-biphenyl (27ad).

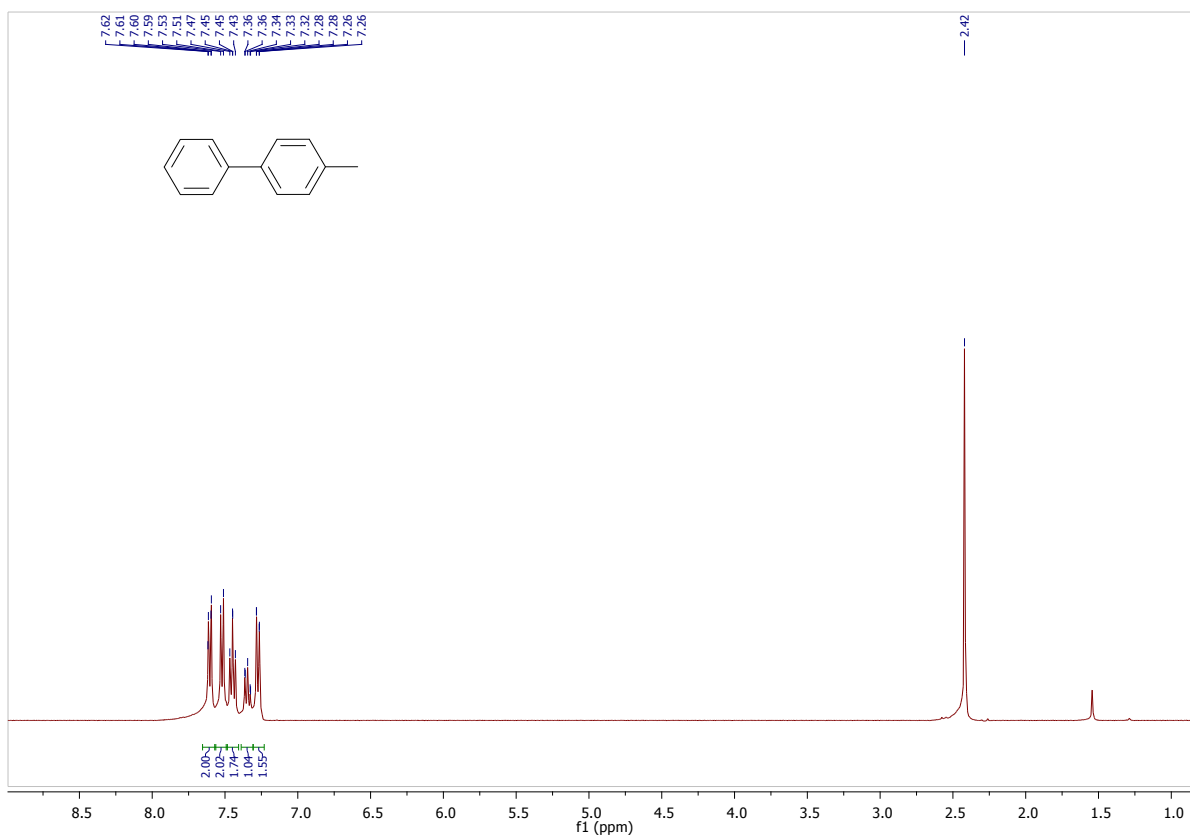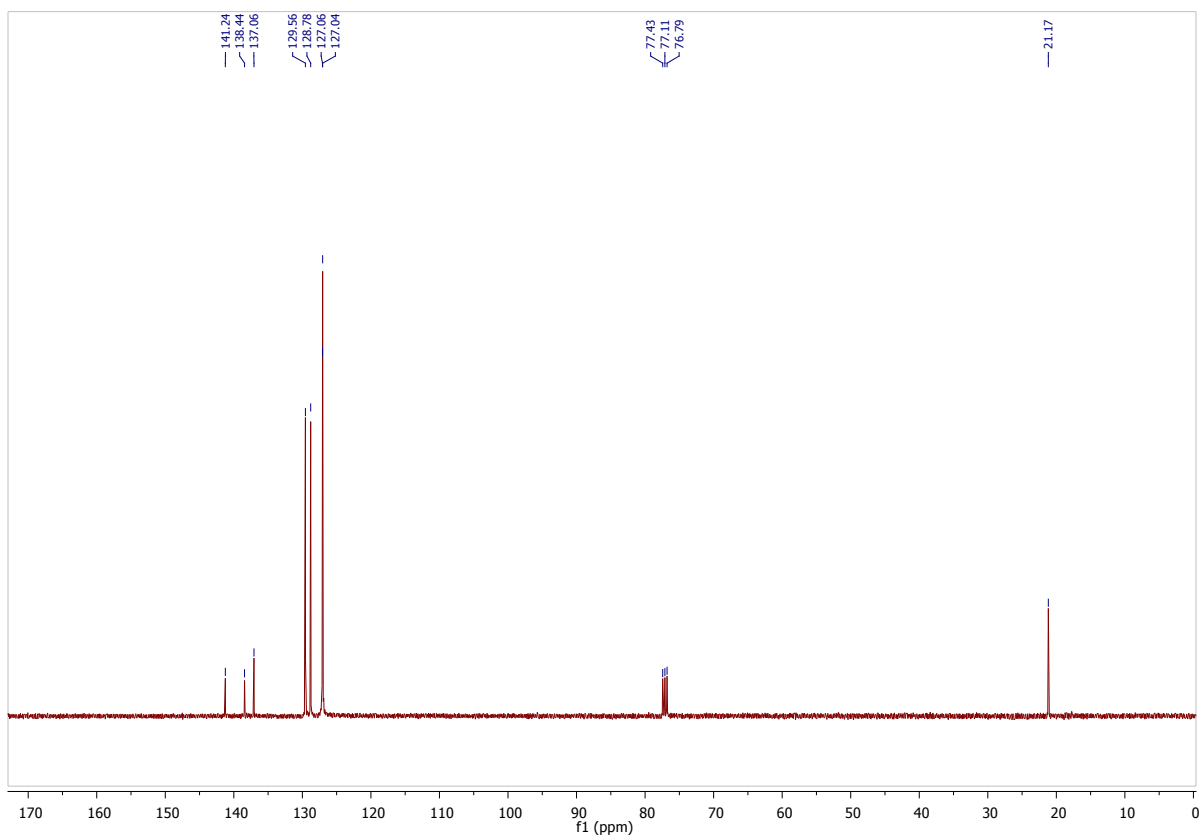

Figure S23. <sup>1</sup>H- and <sup>13</sup>C-NMR spectra of 4-methyl-1,1'-biphenyl (**27ac**).

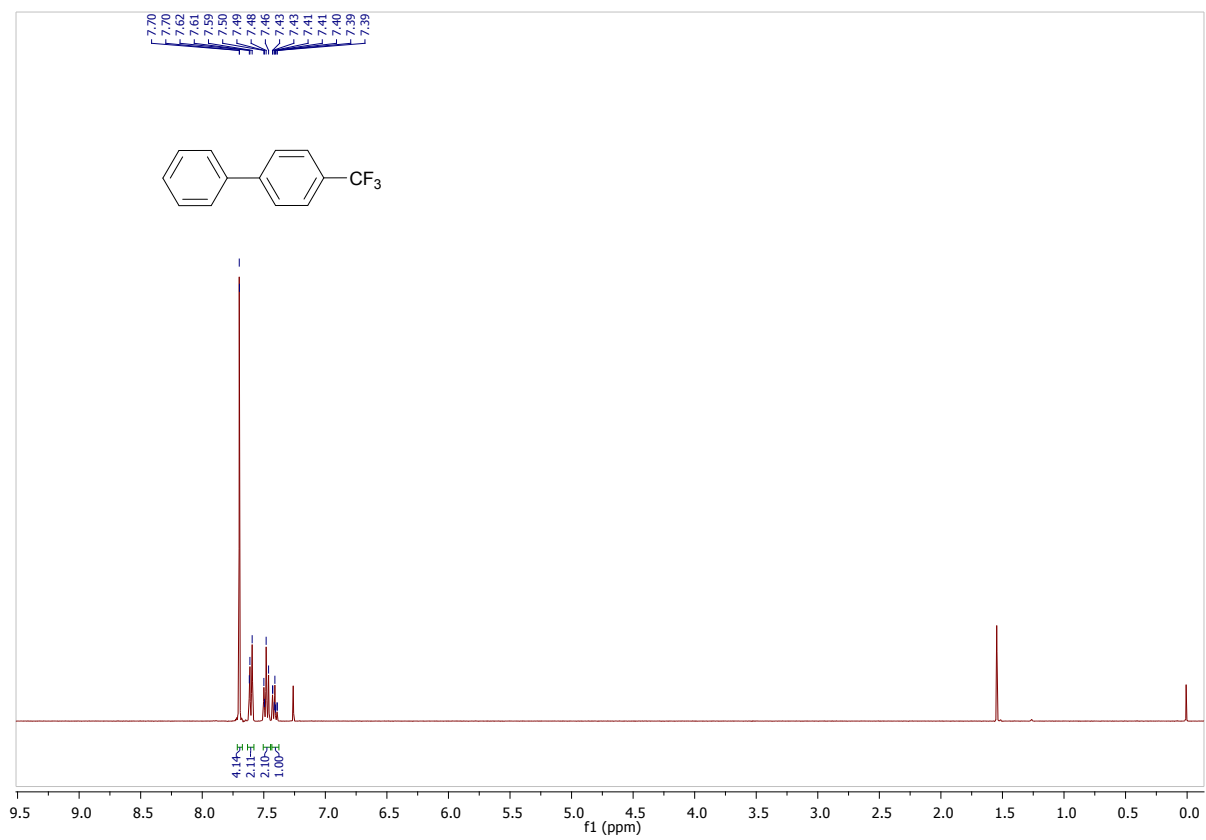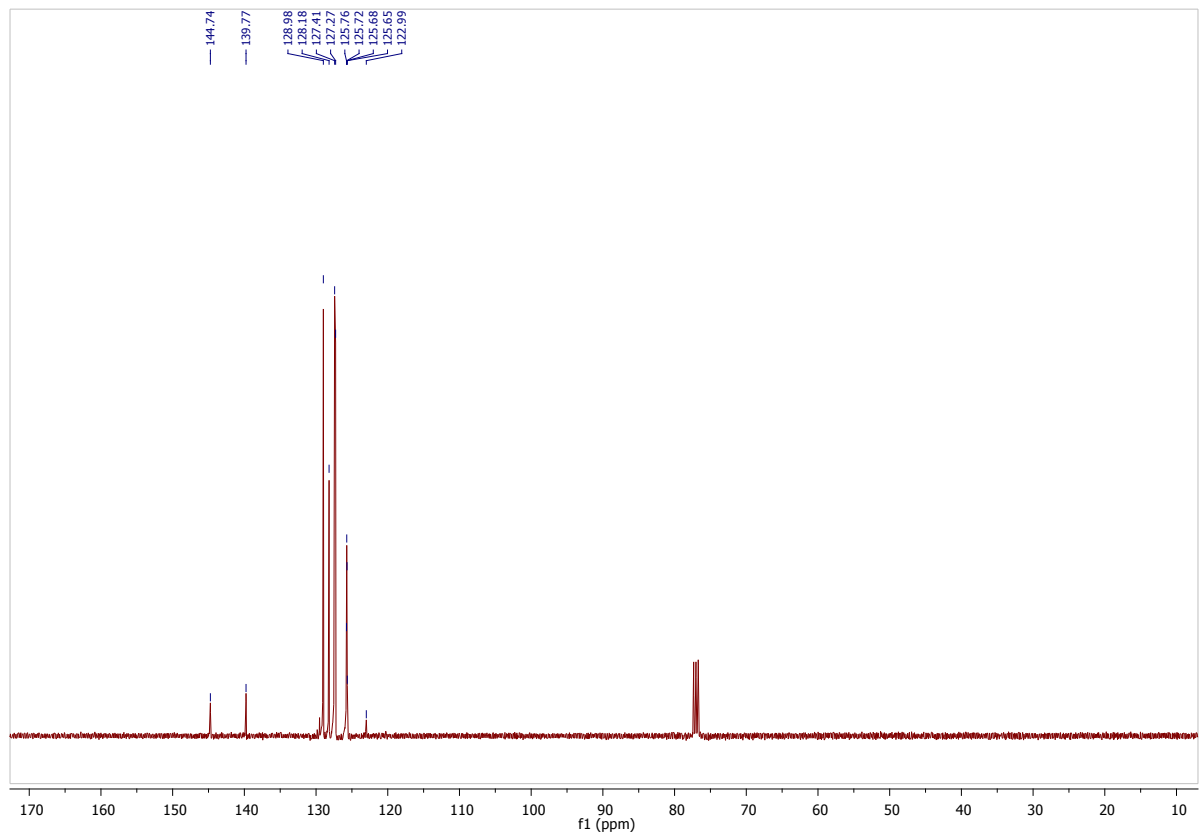

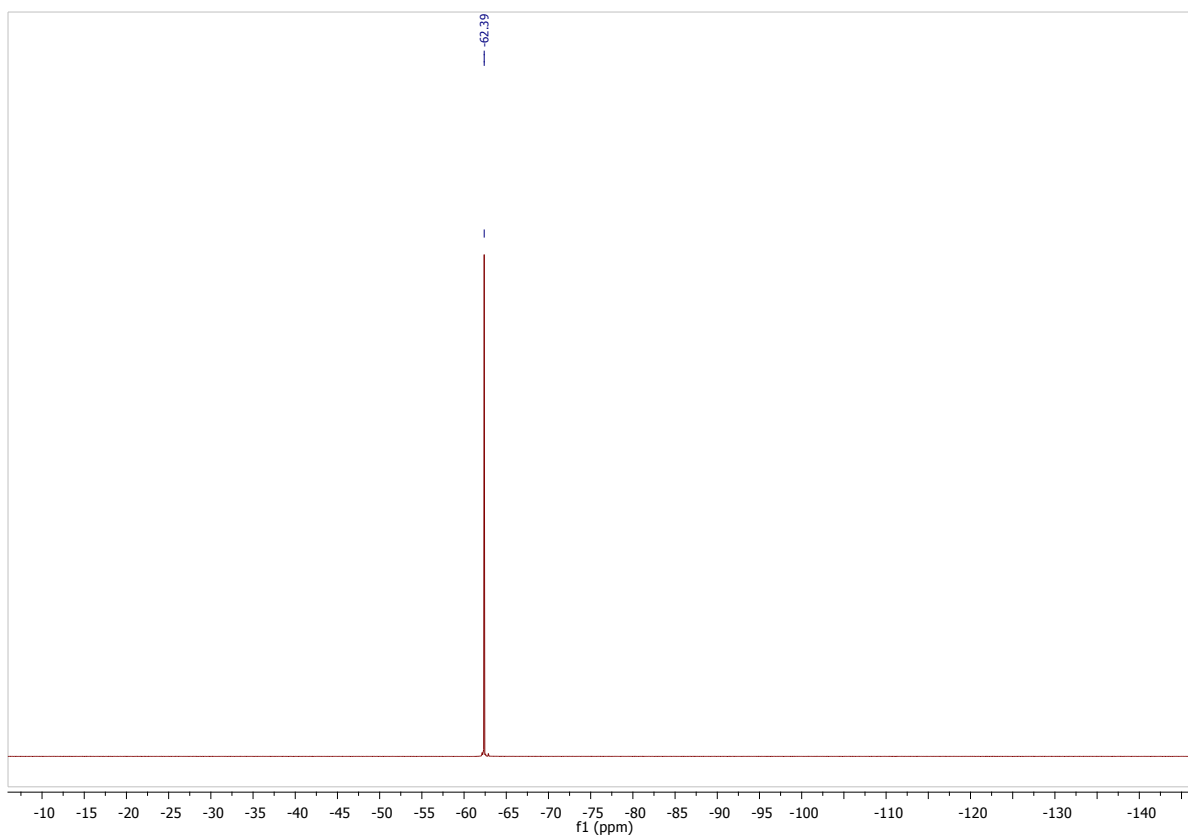

**Figure S24.**  $^1\text{H}$ -,  $^{13}\text{C}$ - and  $^{19}\text{F}$ -NMR spectrums of 4-(trifluoromethyl)-1,1'-biphenyl (**27da**).

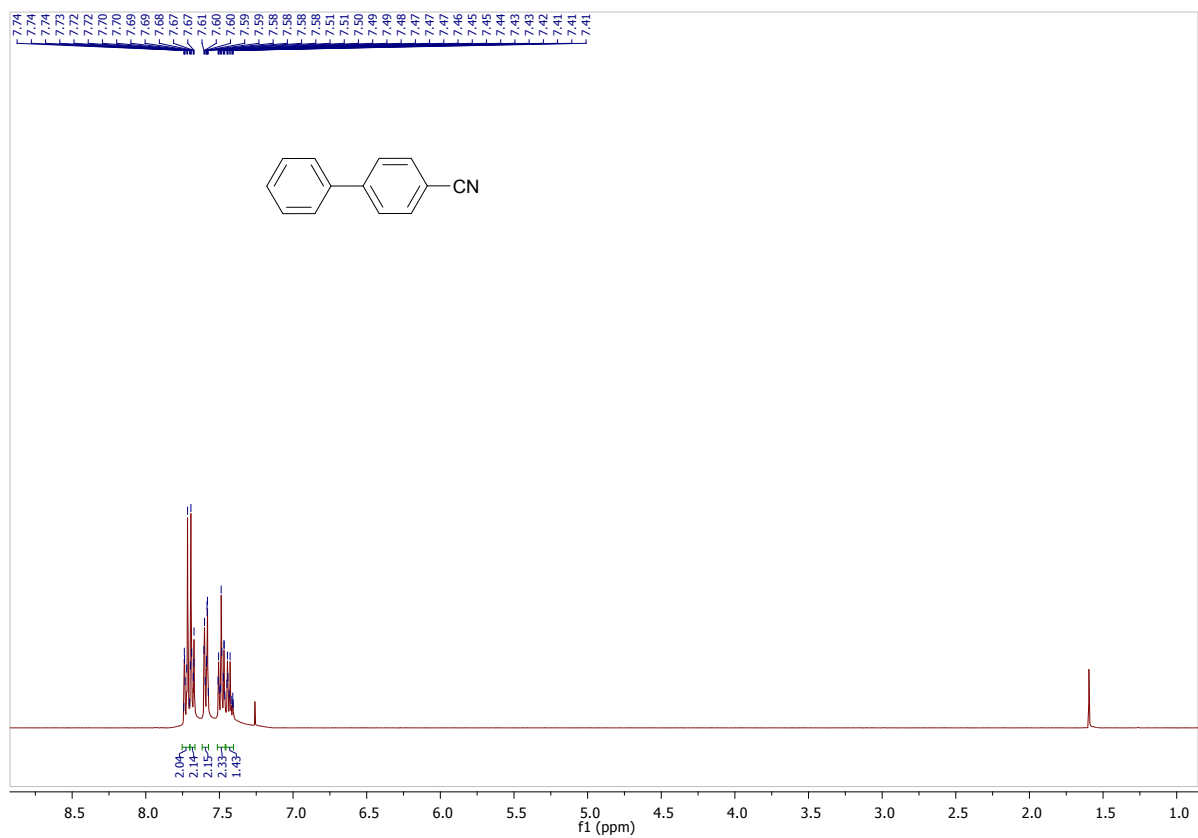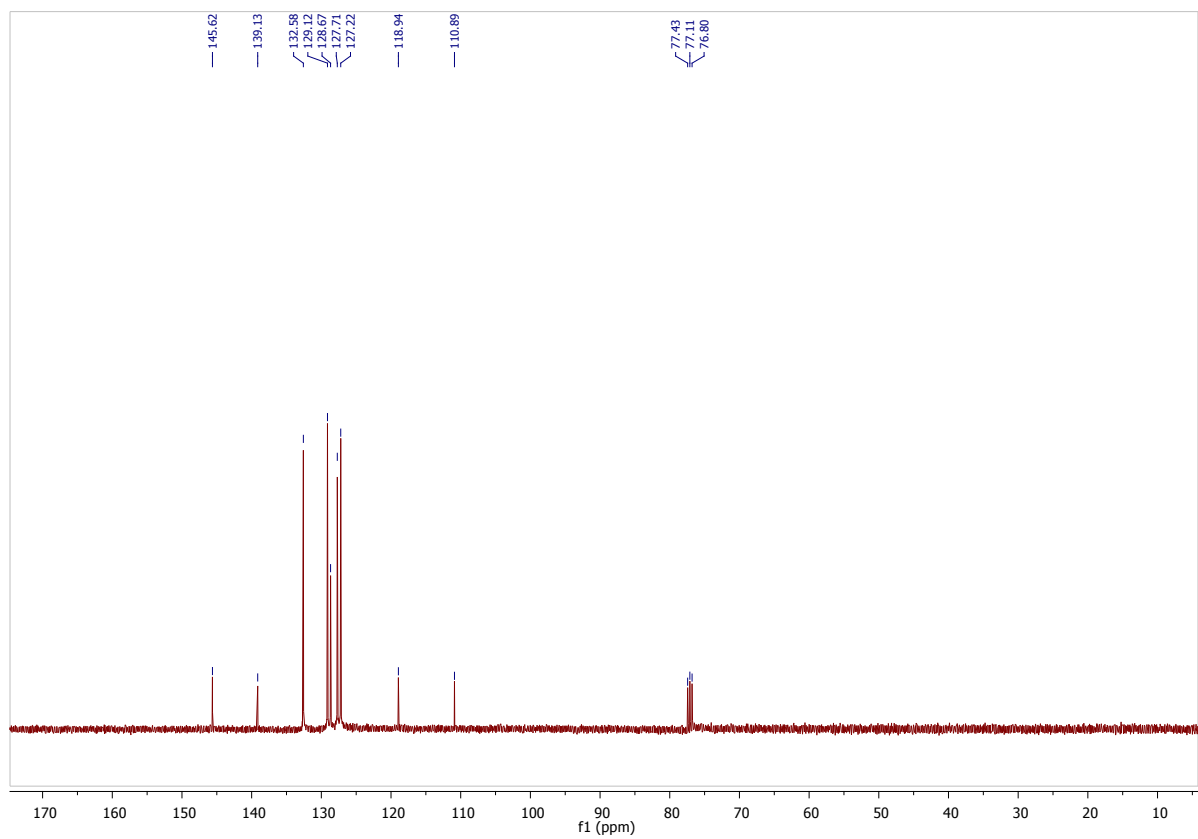

Figure S25. <sup>1</sup>H- and <sup>13</sup>C-NMR spectrums of [1,1'-biphenyl]-4-carbonitrile (27ea).

4-fluoro-1,1'-biphenyl (**27ad**). White solid; 82% yield.  $^1\text{H}$  NMR (400 MHz,  $\text{CDCl}_3$ ):  $\delta$  7.56 (m, 1 H, Ar-H), 7.48 (m, 1 H, Ar-H), 7.44 (m, 1 H, Ar-H), 7.35 (m, 1 H, Ar-H), 7.13 (m, 1 H, Ar-H).  $^{13}\text{C}$  NMR (100 Hz,  $\text{CDCl}_3$ ):  $\delta$  163.7, 161.3, 140.3, 137.4, 137.3, 128.8, 128.7, 128.7, 127.3, 127.0, 115.7, 115.5.  $^{19}\text{F}$  NMR (376 MHz,  $\text{CDCl}_3$ ):  $\delta$  -115.68 (s, F).

4-methyl-1,1'-biphenyl (**27ac**). White solid; 80% yield.  $^1\text{H}$  NMR (400 MHz,  $\text{CDCl}_3$ ):  $\delta$  7.60 (d,  $J$  = 8 Hz, 2 H, Ar-H), 7.52 (d,  $J$  = 8 Hz, 2 H, Ar-H), 7.45 (t,  $J$  = 8 Hz, 2 H, Ar-H), 7.34 (t,  $J$  = 8 Hz, 1 H, Ar-H), 7.28 (s, 2 H, Ar-H), 2.42 (s, 3 H, Ar- $\text{CH}_3$ ).  $^{13}\text{C}$  NMR (100 Hz,  $\text{CDCl}_3$ ):  $\delta$  141.2, 138.4, 137.0, 129.5, 128.7, 127.0, 127.0, 21.1.

4-(trifluoromethyl)-1,1'-biphenyl (**27da**). White solid; 79% yield.  $^1\text{H}$  NMR (400 MHz,  $\text{CDCl}_3$ ):  $\delta$  7.70 (s, 4 H, Ar-H), 7.61 (m, 2 H, Ar-H), 7.48 (m, 2 H, Ar-H), 7.39 (m, 1 H, Ar-H).  $^{13}\text{C}$  NMR (100 Hz,  $\text{CDCl}_3$ ):  $\delta$  144.7, 139.7, 128.9, 128.1, 127.4, 127.2, 125.7, 125.7, 125.6, 125.6, 122.9.  $^{19}\text{F}$  NMR (376 MHz,  $\text{CDCl}_3$ ):  $\delta$  62.39 (s,  $\text{CF}_3$ ).

[1,1'-biphenyl]-4-carbonitrile (**27ea**). White solid; 69% yield.  $^1\text{H}$  NMR (400 MHz,  $\text{CDCl}_3$ ):  $\delta$  7.72 (m, 2 H, Ar-H), 7.68 (m, 2 H, Ar-H), 7.59 (m, 2 H, Ar-H), 7.48 (m, 2 H, Ar-H), 7.42 (m, 1 H, Ar-H).  $^{13}\text{C}$  NMR (100 Hz,  $\text{CDCl}_3$ ):  $\delta$  145.6, 139.1, 132.5, 129.1, 128.6, 127.7, 127.2, 118.9, 110.8.

### The time course of Suzuki-Miyaura Coupling reaction

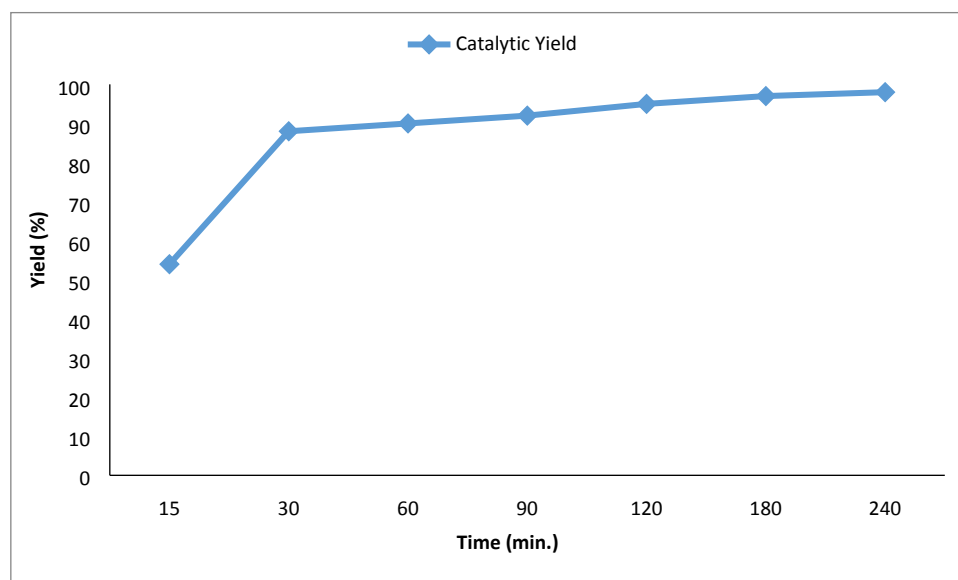

**Figure S26.** Time profile of the coupling reaction of bromobenzene (**25a**) and phenylboronic acid (**26a**). Reaction conditions: bromobenzene (1.0 mmol), phenylboronic acid (1.0 mmol), KOH (0.5 mmol), **6** (0.1 mol%), 0.5 mL 2-propanol + 1.5 mL  $\text{H}_2\text{O}$ , RT, 30 min., under air.

## FTIR Spectrums

The IR spectra of synthesized compounds are similar. In the spectra,  $\nu_{\text{N-H}}$  stretching vibration frequencies are seen at 3250-3420  $\text{cm}^{-1}$ . Aromatic  $\nu_{\text{C-H}}$  stretching vibration frequencies are observed between 3000-3100  $\text{cm}^{-1}$ . Furthermore, aromatic  $\nu_{\text{C=C}}$  stretching vibration frequencies were observed between 1579-1614  $\text{cm}^{-1}$ .

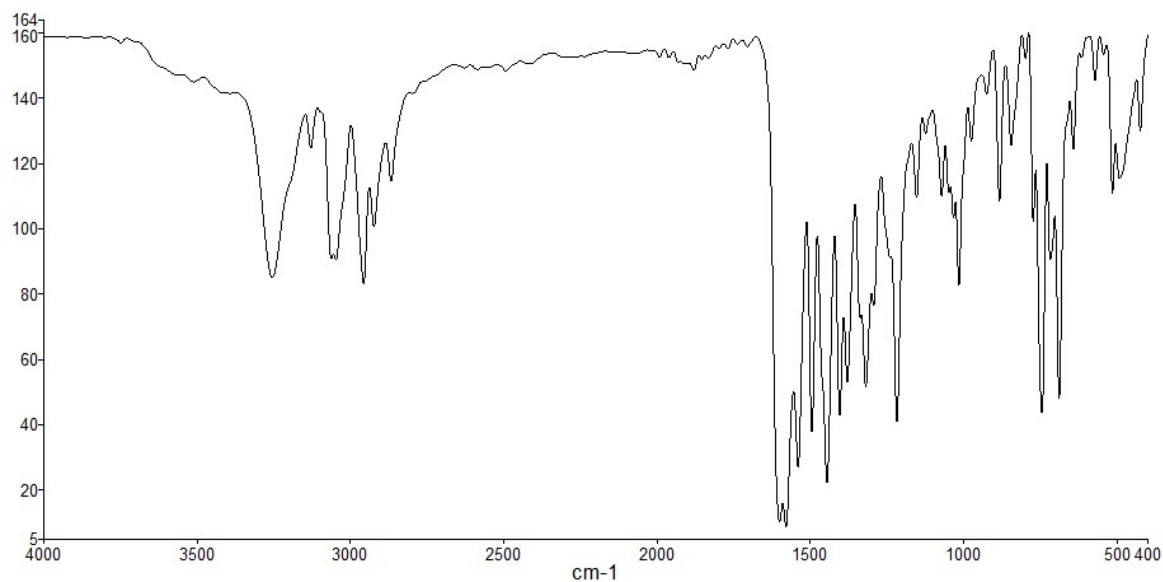

**Figure S27.** IR spectrum of **1**.

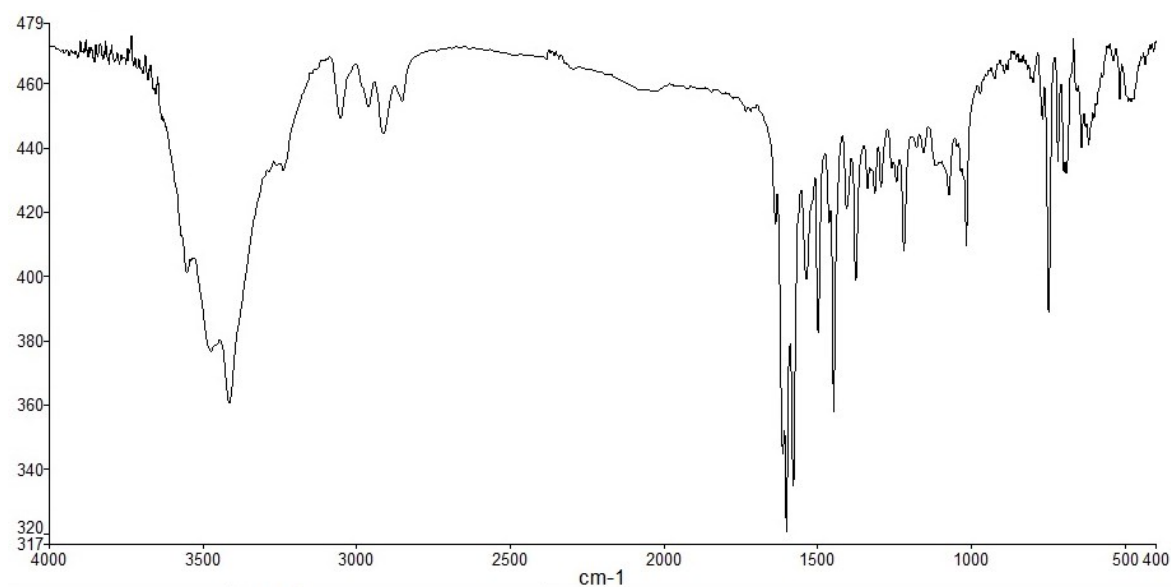

**Figure S28.** IR spectrum of **2**.

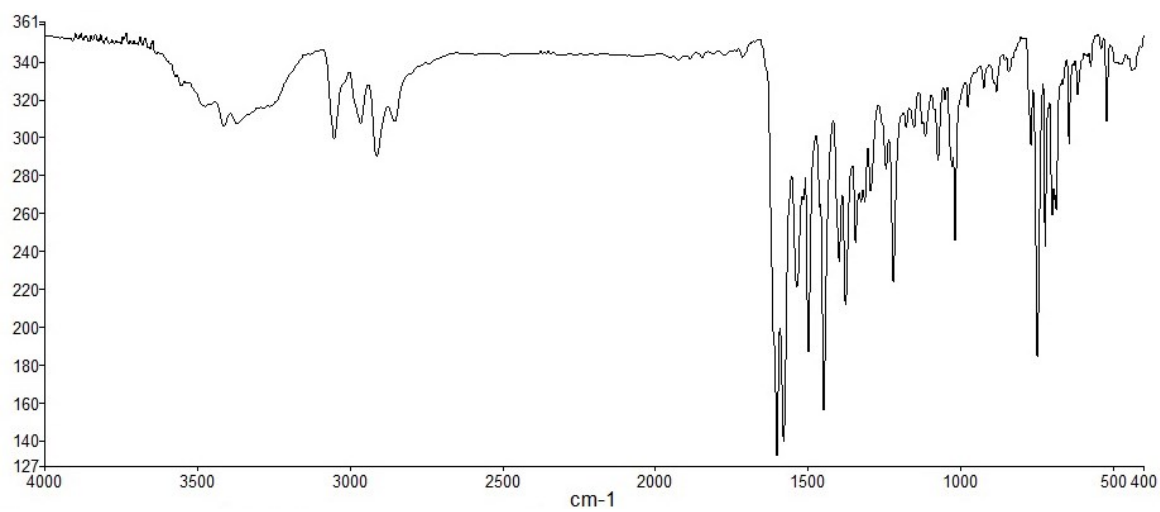

**Figure S29.** IR spectrum of **3**.

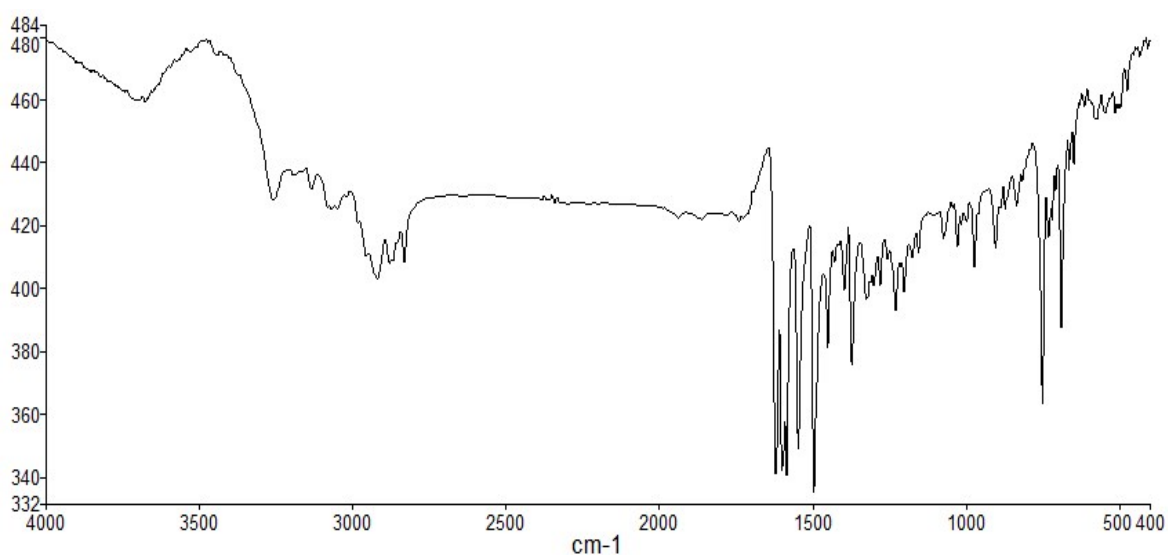

**Figure S30.** IR spectrum of **5**.



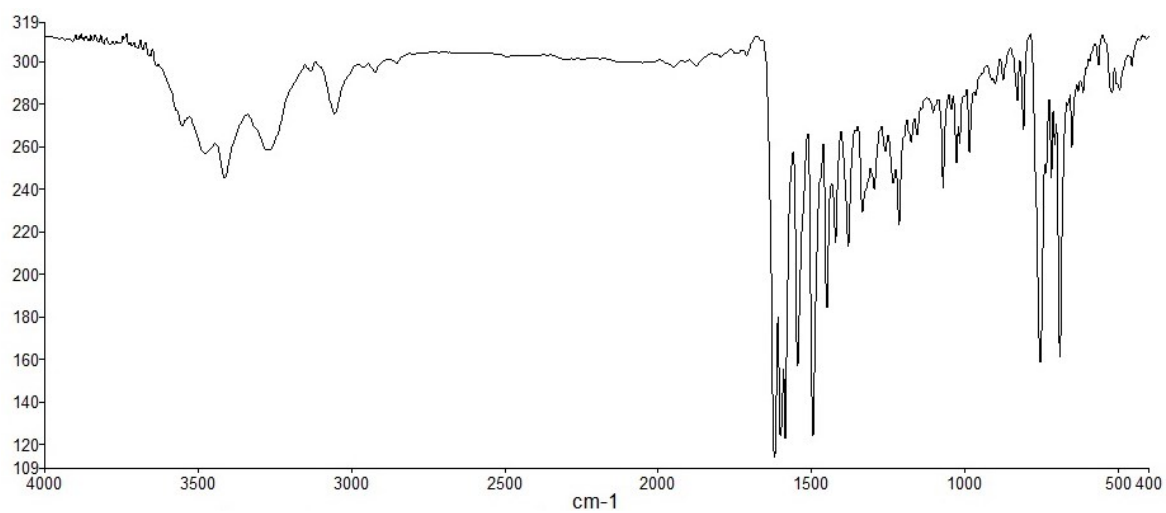

**Figure S31.** IR spectrum of **6**.

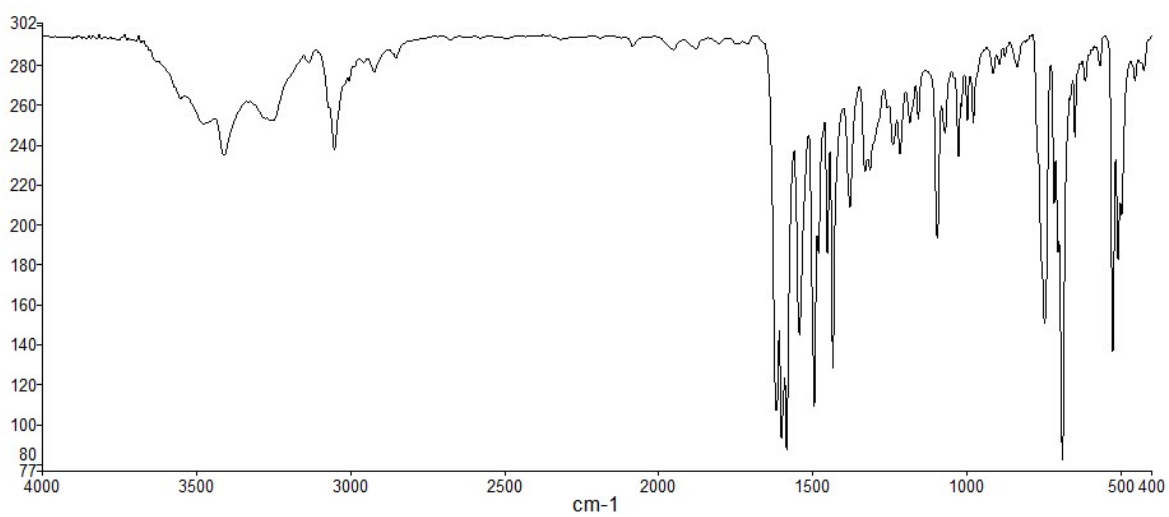

**Figure S32.** IR spectrum of **7**.

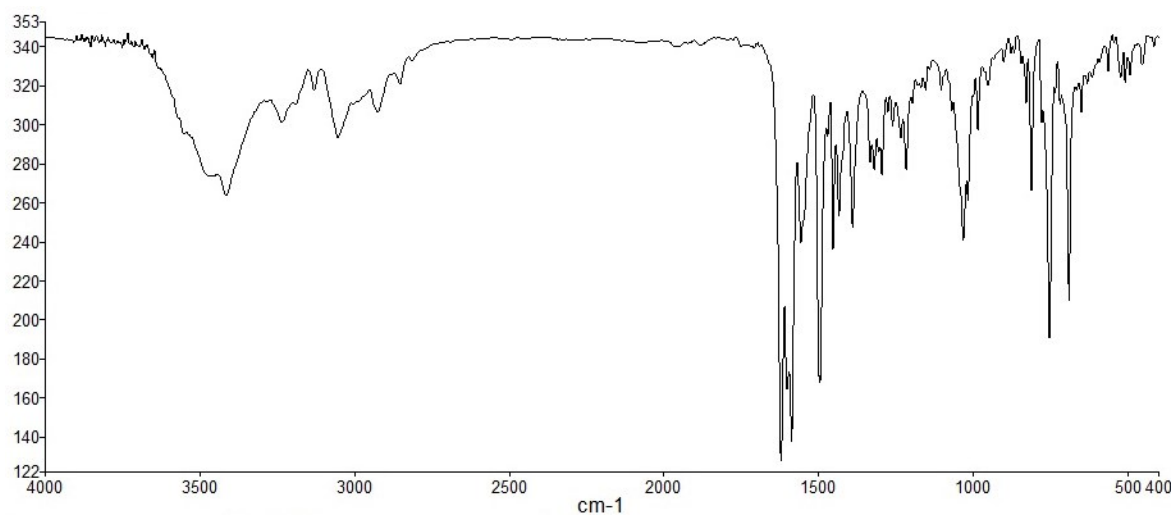

**Figure S33.** IR spectrum of **8**.

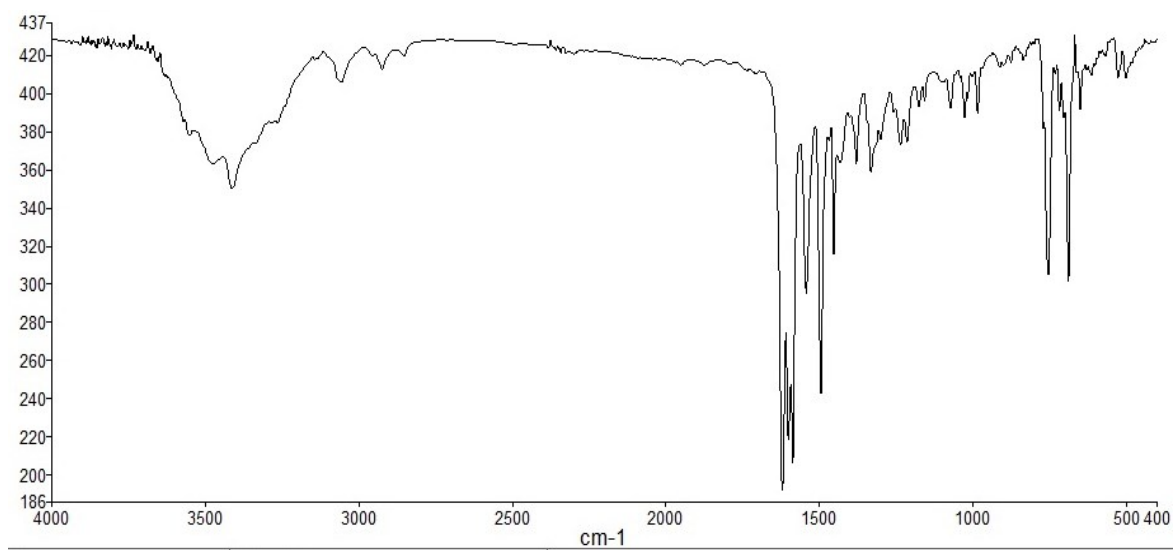

**Figure S34.** IR spectrum of **9**.

**Table S1.** Crystal data and structure refinement parameters for **1-4** and **6**.

|                                                                          | <b>1</b>                                                | <b>3</b>                                               | <b>4</b>                                                             | <b>2</b>                                                                           | <b>6</b>                                                              |
|--------------------------------------------------------------------------|---------------------------------------------------------|--------------------------------------------------------|----------------------------------------------------------------------|------------------------------------------------------------------------------------|-----------------------------------------------------------------------|
| Empirical formula                                                        | C <sub>30</sub> H <sub>29</sub> ClN <sub>4</sub> R<br>u | C <sub>30</sub> H <sub>30</sub> ClN <sub>4</sub><br>lr | C <sub>30</sub> H <sub>32</sub> Cl <sub>3</sub> N <sub>4</sub><br>lr | C <sub>91</sub> H <sub>92</sub> Cl <sub>5</sub> N <sub>12</sub><br>Rh <sub>3</sub> | C <sub>25</sub> H <sub>21</sub> Br <sub>2</sub> N <sub>5</sub> P<br>d |
| Formula weight                                                           | 582.09                                                  | 674.23                                                 | 747.14                                                               | 1839.74                                                                            | 657.69                                                                |
| Crystal system                                                           | Triclinic                                               | Triclinic                                              | Triclinic                                                            | Triclinic                                                                          | Triclinic                                                             |
| Space group                                                              | P-1                                                     | P-1                                                    | P-1                                                                  | P-1                                                                                | P-1                                                                   |
| <i>a</i> (Å)                                                             | 9.6026 (9)                                              | 13.700 (3)                                             | 9.9976 (9)                                                           | 13.6235 (10)                                                                       | 9.6188 (11)                                                           |
| <i>b</i> (Å)                                                             | 12.3020 (13)                                            | 15.904 (4)                                             | 11.8767 (12)                                                         | 15.9331 (13)                                                                       | 11.9263 (14)                                                          |
| <i>c</i> (Å)                                                             | 13.6024 (15)                                            | 21.409 (6)                                             | 13.6237 (14)                                                         | 21.3560 (18)                                                                       | 12.2365 (13)                                                          |
| $\alpha$ (°)                                                             | 100.477 (5)                                             | 69.083 (12)                                            | 98.645 (4)                                                           | 69.077 (3)                                                                         | 77.662 (4)                                                            |
| $\beta$ (°)                                                              | 109.614 (4)                                             | 83.451 (12)                                            | 96.039 (5)                                                           | 83.636 (4)                                                                         | 71.146 (5)                                                            |
| $\gamma$ (°)                                                             | 110.590 (5)                                             | 88.890 (13)                                            | 110.163 (4)                                                          | 88.592 (3)                                                                         | 69.041 (4)                                                            |
| <i>V</i> (Å <sup>3</sup> )                                               | 1332.5 (2)                                              | 4328 (2)                                               | 1479.6 (3)                                                           | 4302.7 (6)                                                                         | 1232.9 (2)                                                            |
| <i>Z</i>                                                                 | 2                                                       | 6                                                      | 2                                                                    | 2                                                                                  | 2                                                                     |
| <i>D</i> <sub>c</sub> (g cm <sup>-3</sup> )                              | 1.451                                                   | 1.552                                                  | 1.677                                                                | 1.420                                                                              | 1.772                                                                 |
| $\mu$ (mm <sup>-1</sup> )                                                | 0.71                                                    | 4.74                                                   | 4.81                                                                 | 0.78                                                                               | 4.02                                                                  |
| $\theta$ range (°)                                                       | 2.9-28.3                                                | 2.9-26.6                                               | 2.9-26.4                                                             | 2.9-26.5                                                                           | 3.3-28.4                                                              |
| Measured refls.                                                          | 44857                                                   | 94400                                                  | 39096                                                                | 62298                                                                              | 38069                                                                 |
| Independent refls.                                                       | 6549                                                    | 16019                                                  | 5978                                                                 | 15757                                                                              | 4647                                                                  |
| <i>R</i> <sub>int</sub>                                                  | 0.079                                                   | 0.100                                                  | 0.084                                                                | 0.100                                                                              | 0.053                                                                 |
| <i>S</i>                                                                 | 1.11                                                    | 1.13                                                   | 1.19                                                                 | 1.12                                                                               | 1.23                                                                  |
| <i>R</i> <sub>1</sub> / <i>wR</i> <sub>2</sub>                           | 0.078/0.176                                             | 0.076/0.163                                            | 0.058/0.105                                                          | 0.099/0.240                                                                        | 0.086/0.196                                                           |
| $\Delta\rho_{\text{max}}/\Delta\rho_{\text{min}}$<br>(eÅ <sup>-3</sup> ) | 0.66/-0.71                                              | 1.77/-2.98                                             | 1.11/-0.87                                                           | 0.94/-3.15                                                                         | 0.64/-0.82                                                            |

## Cartesian

### Cat-PhBr-complex

---

| Center<br>Number | Atomic<br>Number | Atomic<br>Type | Coordinates (Angstroms) |           |           |
|------------------|------------------|----------------|-------------------------|-----------|-----------|
|                  |                  |                | X                       | Y         | Z         |
| 1                | 6                | 0              | -0.810423               | 1.228815  | -0.000002 |
| 2                | 6                | 0              | -2.221107               | 1.219601  | 0.000008  |
| 3                | 6                | 0              | -2.927175               | -0.000010 | -0.000010 |
| 4                | 6                | 0              | -2.221075               | -1.219615 | 0.000002  |
| 5                | 6                | 0              | -0.810410               | -1.228809 | 0.000004  |
| 6                | 6                | 0              | -0.130077               | 0.000017  | -0.000008 |
| 7                | 1                | 0              | -0.267772               | 2.168955  | 0.000006  |
| 8                | 1                | 0              | -2.757888               | 2.164464  | 0.000011  |
| 9                | 1                | 0              | -4.013695               | -0.000037 | -0.000003 |
| 10               | 1                | 0              | -2.757867               | -2.164473 | 0.000003  |
| 11               | 1                | 0              | -0.267709               | -2.168921 | 0.000013  |
| 12               | 35               | 0              | 1.851044                | 0.000001  | 0.000000  |

---

### TS1

---

| Center<br>Number | Atomic<br>Number | Atomic<br>Type | Coordinates (Angstroms) |          |          |
|------------------|------------------|----------------|-------------------------|----------|----------|
|                  |                  |                | X                       | Y        | Z        |
| 1                | 7                | 0              | 0.922625                | 2.348823 | 0.327553 |
| 2                | 7                | 0              | 2.298105                | 2.617362 | 0.569395 |
| 3                | 6                | 0              | 2.852856                | 1.417042 | 0.637390 |
| 4                | 7                | 0              | 1.892595                | 0.412604 | 0.428322 |
| 5                | 6                | 0              | 0.618040                | 0.993289 | 0.219690 |
| 6                | 7                | 0              | 4.186357                | 1.205825 | 0.948627 |
| 7                | 6                | 0              | 5.115875                | 0.464908 | 0.166929 |

|    |    |   |           |           |           |
|----|----|---|-----------|-----------|-----------|
| 8  | 6  | 0 | 6.378831  | 0.165965  | 0.729386  |
| 9  | 6  | 0 | 7.336266  | -0.535277 | -0.023359 |
| 10 | 6  | 0 | 7.045353  | -0.959329 | -1.337091 |
| 11 | 6  | 0 | 5.785145  | -0.660877 | -1.891981 |
| 12 | 6  | 0 | 4.823568  | 0.052531  | -1.152912 |
| 13 | 6  | 0 | 0.040333  | 3.474243  | 0.256762  |
| 14 | 6  | 0 | 2.121253  | -1.004301 | 0.571788  |
| 15 | 6  | 0 | 2.587221  | -1.505882 | 1.802027  |
| 16 | 6  | 0 | 2.809312  | -2.888168 | 1.947341  |
| 17 | 6  | 0 | 2.557040  | -3.764050 | 0.872171  |
| 18 | 6  | 0 | 2.083310  | -3.251974 | -0.352856 |
| 19 | 6  | 0 | 1.867396  | -1.870452 | -0.506623 |
| 20 | 6  | 0 | -1.280498 | 3.330694  | -0.218287 |
| 21 | 6  | 0 | -2.127470 | 4.451901  | -0.269825 |
| 22 | 6  | 0 | -1.671178 | 5.719856  | 0.141088  |
| 23 | 6  | 0 | -0.347626 | 5.856160  | 0.606841  |
| 24 | 6  | 0 | 0.509309  | 4.743055  | 0.665783  |
| 25 | 46 | 0 | -1.144126 | 0.011295  | -0.000124 |
| 26 | 7  | 0 | -2.622910 | -0.683313 | 1.545639  |
| 27 | 6  | 0 | -2.372467 | -1.790749 | 2.302696  |
| 28 | 6  | 0 | -3.225698 | -2.211259 | 3.336019  |
| 29 | 6  | 0 | -4.386786 | -1.463172 | 3.612111  |
| 30 | 6  | 0 | -4.650994 | -0.319369 | 2.833685  |
| 31 | 6  | 0 | -3.752043 | 0.034502  | 1.814030  |
| 32 | 1  | 0 | 4.574244  | 1.837828  | 1.640813  |
| 33 | 1  | 0 | 6.604692  | 0.480011  | 1.745895  |
| 34 | 1  | 0 | 8.305165  | -0.755231 | 0.418079  |
| 35 | 1  | 0 | 7.785709  | -1.505486 | -1.915053 |
| 36 | 1  | 0 | 5.550131  | -0.972677 | -2.906707 |
| 37 | 1  | 0 | 3.869328  | 0.300841  | -1.608130 |
| 38 | 1  | 0 | 2.769553  | -0.828292 | 2.631162  |
| 39 | 1  | 0 | 3.169339  | -3.277584 | 2.895869  |
| 40 | 1  | 0 | 2.726292  | -4.831357 | 0.987673  |

|    |    |   |           |           |           |
|----|----|---|-----------|-----------|-----------|
| 41 | 1  | 0 | 1.887643  | -3.922444 | -1.185252 |
| 42 | 1  | 0 | 1.513757  | -1.466272 | -1.449379 |
| 43 | 1  | 0 | -1.632494 | 2.352757  | -0.535960 |
| 44 | 1  | 0 | -3.143867 | 4.331841  | -0.636791 |
| 45 | 1  | 0 | -2.330357 | 6.582736  | 0.097042  |
| 46 | 1  | 0 | 0.020295  | 6.827891  | 0.926659  |
| 47 | 1  | 0 | 1.525917  | 4.847797  | 1.024128  |
| 48 | 1  | 0 | -5.062972 | -1.761506 | 4.407880  |
| 49 | 1  | 0 | -5.532794 | 0.289205  | 3.006977  |
| 50 | 1  | 0 | -3.927640 | 0.904249  | 1.190808  |
| 51 | 1  | 0 | -1.468970 | -2.340289 | 2.064696  |
| 52 | 1  | 0 | -2.979778 | -3.101233 | 3.906523  |
| 53 | 6  | 0 | -1.642351 | -0.314604 | -2.432483 |
| 54 | 6  | 0 | -2.625051 | -1.063507 | -1.728840 |
| 55 | 6  | 0 | -3.966058 | -0.612443 | -1.627751 |
| 56 | 6  | 0 | -4.320314 | 0.614381  | -2.207089 |
| 57 | 6  | 0 | -3.359264 | 1.374207  | -2.926003 |
| 58 | 6  | 0 | -2.042960 | 0.910656  | -3.041912 |
| 59 | 1  | 0 | -0.674934 | -0.743180 | -2.667852 |
| 60 | 1  | 0 | -4.706630 | -1.211367 | -1.107029 |
| 61 | 1  | 0 | -5.343421 | 0.970656  | -2.117343 |
| 62 | 1  | 0 | -3.651498 | 2.308381  | -3.398745 |
| 63 | 1  | 0 | -1.308480 | 1.473705  | -3.612486 |
| 64 | 35 | 0 | -2.263084 | -2.998500 | -1.352195 |

-----

## int01

---

| Center | Atomic | Atomic | Coordinates (Angstroms) |           |           |
|--------|--------|--------|-------------------------|-----------|-----------|
| Number | Number | Type   | X                       | Y         | Z         |
| 1      | 7      | 0      | 0.716990                | 2.307038  | 0.076486  |
| 2      | 7      | 0      | 2.071598                | 2.669701  | 0.304265  |
| 3      | 6      | 0      | 2.703644                | 1.506787  | 0.391122  |
| 4      | 7      | 0      | 1.799028                | 0.443149  | 0.208243  |
| 5      | 6      | 0      | 0.507050                | 0.947581  | -0.007181 |
| 6      | 7      | 0      | 4.046266                | 1.386758  | 0.696354  |
| 7      | 6      | 0      | 5.011773                | 0.646252  | -0.044311 |
| 8      | 6      | 0      | 6.279205                | 0.426730  | 0.542425  |
| 9      | 6      | 0      | 7.272129                | -0.268787 | -0.168525 |
| 10     | 6      | 0      | 7.011184                | -0.765785 | -1.462653 |
| 11     | 6      | 0      | 5.745585                | -0.546017 | -2.041537 |
| 12     | 6      | 0      | 4.748748                | 0.162131  | -1.345226 |
| 13     | 6      | 0      | -0.241641               | 3.372736  | -0.023400 |
| 14     | 6      | 0      | 2.101988                | -0.962050 | 0.352719  |
| 15     | 6      | 0      | 2.681623                | -1.424177 | 1.549181  |
| 16     | 6      | 0      | 2.968796                | -2.794496 | 1.692679  |
| 17     | 6      | 0      | 2.668726                | -3.695499 | 0.651336  |
| 18     | 6      | 0      | 2.082808                | -3.220822 | -0.539692 |
| 19     | 6      | 0      | 1.801127                | -1.851426 | -0.693982 |
| 20     | 6      | 0      | -1.528833               | 3.138025  | -0.547977 |
| 21     | 6      | 0      | -2.448921               | 4.198256  | -0.626291 |
| 22     | 6      | 0      | -2.094561               | 5.491835  | -0.194323 |
| 23     | 6      | 0      | -0.801712               | 5.717701  | 0.318875  |
| 24     | 6      | 0      | 0.127248                | 4.665499  | 0.405468  |
| 25     | 46     | 0      | -1.250219               | -0.199333 | -0.264530 |
| 26     | 7      | 0      | -1.907202               | -0.361541 | 1.911671  |
| 27     | 6      | 0      | -1.021896               | -0.704318 | 2.888546  |
| 28     | 6      | 0      | -1.387225               | -0.785231 | 4.242635  |

|    |   |   |           |           |           |
|----|---|---|-----------|-----------|-----------|
| 29 | 6 | 0 | -2.715058 | -0.493213 | 4.609918  |
| 30 | 6 | 0 | -3.631090 | -0.133875 | 3.602548  |
| 31 | 6 | 0 | -3.190930 | -0.083585 | 2.269324  |
| 32 | 1 | 0 | 4.403951  | 2.080632  | 1.344445  |
| 33 | 1 | 0 | 6.480461  | 0.795824  | 1.545391  |
| 34 | 1 | 0 | 8.244621  | -0.427991 | 0.290571  |
| 35 | 1 | 0 | 7.778650  | -1.307902 | -2.008092 |
| 36 | 1 | 0 | 5.533802  | -0.914266 | -3.042266 |
| 37 | 1 | 0 | 3.790670  | 0.350951  | -1.820711 |
| 38 | 1 | 0 | 2.903747  | -0.728485 | 2.353057  |
| 39 | 1 | 0 | 3.416773  | -3.154814 | 2.614692  |
| 40 | 1 | 0 | 2.888508  | -4.753485 | 0.766347  |
| 41 | 1 | 0 | 1.851090  | -3.910587 | -1.346560 |
| 42 | 1 | 0 | 1.361385  | -1.474773 | -1.611363 |
| 43 | 1 | 0 | -1.803074 | 2.142652  | -0.886492 |
| 44 | 1 | 0 | -3.440457 | 4.011442  | -1.030485 |
| 45 | 1 | 0 | -2.809818 | 6.307304  | -0.259199 |
| 46 | 1 | 0 | -0.513778 | 6.710826  | 0.653860  |
| 47 | 1 | 0 | 1.121700  | 4.837110  | 0.798883  |
| 48 | 1 | 0 | -3.026068 | -0.543589 | 5.649221  |
| 49 | 1 | 0 | -4.664226 | 0.100877  | 3.837353  |
| 50 | 1 | 0 | -3.868011 | 0.182659  | 1.465177  |
| 51 | 1 | 0 | -0.007325 | -0.914326 | 2.569510  |
| 52 | 1 | 0 | -0.646304 | -1.066996 | 4.983725  |
| 53 | 6 | 0 | -1.805515 | -0.830725 | -2.346752 |
| 54 | 6 | 0 | -2.773403 | -1.188765 | -1.313983 |
| 55 | 6 | 0 | -4.079468 | -0.572981 | -1.319984 |
| 56 | 6 | 0 | -4.373767 | 0.419050  | -2.250982 |
| 57 | 6 | 0 | -3.427448 | 0.788321  | -3.263265 |
| 58 | 6 | 0 | -2.186299 | 0.161334  | -3.319662 |
| 59 | 1 | 0 | -0.995706 | -1.511236 | -2.596525 |
| 60 | 1 | 0 | -4.824985 | -0.886974 | -0.594240 |
| 61 | 1 | 0 | -5.343971 | 0.910459  | -2.216454 |



|    |    |   |           |           |           |
|----|----|---|-----------|-----------|-----------|
| 62 | 1  | 0 | -3.698959 | 1.536497  | -4.004146 |
| 63 | 1  | 0 | -1.492694 | 0.386651  | -4.128135 |
| 64 | 35 | 0 | -2.806854 | -3.217936 | -0.730875 |

-----

**TS2**

-----

| Center<br>Number | Atomic<br>Number | Atomic<br>Type | Coordinates (Angstroms) |           |           |
|------------------|------------------|----------------|-------------------------|-----------|-----------|
|                  |                  |                | X                       | Y         | Z         |
| 1                | 7                | 0              | 0.777829                | 2.317594  | -0.071541 |
| 2                | 7                | 0              | 2.132694                | 2.665807  | 0.167660  |
| 3                | 6                | 0              | 2.745431                | 1.494932  | 0.299373  |
| 4                | 7                | 0              | 1.824381                | 0.442153  | 0.132346  |
| 5                | 6                | 0              | 0.550930                | 0.964853  | -0.113187 |
| 6                | 7                | 0              | 4.078897                | 1.361115  | 0.631340  |
| 7                | 6                | 0              | 5.043682                | 0.579073  | -0.067902 |
| 8                | 6                | 0              | 6.292497                | 0.348682  | 0.552778  |
| 9                | 6                | 0              | 7.285099                | -0.386768 | -0.117247 |
| 10               | 6                | 0              | 7.041219                | -0.912803 | -1.403157 |
| 11               | 6                | 0              | 5.793741                | -0.681672 | -2.015879 |
| 12               | 6                | 0              | 4.798039                | 0.066509  | -1.361009 |
| 13               | 6                | 0              | -0.164479               | 3.391941  | -0.227643 |
| 14               | 6                | 0              | 2.094303                | -0.966921 | 0.309220  |
| 15               | 6                | 0              | 2.637183                | -1.419328 | 1.526194  |
| 16               | 6                | 0              | 2.885769                | -2.793483 | 1.699956  |
| 17               | 6                | 0              | 2.583265                | -3.705927 | 0.669201  |
| 18               | 6                | 0              | 2.035253                | -3.239730 | -0.542858 |
| 19               | 6                | 0              | 1.794033                | -1.866544 | -0.728737 |
| 20               | 6                | 0              | -1.400734               | 3.174916  | -0.867617 |
| 21               | 6                | 0              | -2.307033               | 4.241124  | -1.003487 |
| 22               | 6                | 0              | -1.983298               | 5.523396  | -0.517043 |
| 23               | 6                | 0              | -0.738698               | 5.731805  | 0.110362  |

|    |    |   |           |           |           |
|----|----|---|-----------|-----------|-----------|
| 24 | 6  | 0 | 0.174204  | 4.672194  | 0.256627  |
| 25 | 46 | 0 | -1.243677 | -0.170373 | -0.315862 |
| 26 | 7  | 0 | -1.853520 | 0.002711  | 1.807200  |
| 27 | 6  | 0 | -1.012159 | -0.387050 | 2.804623  |
| 28 | 6  | 0 | -1.360992 | -0.285392 | 4.160783  |
| 29 | 6  | 0 | -2.618888 | 0.245506  | 4.505007  |
| 30 | 6  | 0 | -3.485727 | 0.653773  | 3.473500  |
| 31 | 6  | 0 | -3.070355 | 0.513635  | 2.139428  |
| 32 | 1  | 0 | 4.438100  | 2.068414  | 1.264068  |
| 33 | 1  | 0 | 6.479764  | 0.740398  | 1.549773  |
| 34 | 1  | 0 | 8.243737  | -0.554151 | 0.367299  |
| 35 | 1  | 0 | 7.808203  | -1.485743 | -1.916783 |
| 36 | 1  | 0 | 5.595732  | -1.071926 | -3.011036 |
| 37 | 1  | 0 | 3.855488  | 0.263924  | -1.863411 |
| 38 | 1  | 0 | 2.860526  | -0.714367 | 2.321565  |
| 39 | 1  | 0 | 3.305012  | -3.148038 | 2.637491  |
| 40 | 1  | 0 | 2.772091  | -4.766845 | 0.808842  |
| 41 | 1  | 0 | 1.801928  | -3.938612 | -1.341251 |
| 42 | 1  | 0 | 1.388743  | -1.495524 | -1.664776 |
| 43 | 1  | 0 | -1.648646 | 2.189857  | -1.251072 |
| 44 | 1  | 0 | -3.260102 | 4.069555  | -1.496702 |
| 45 | 1  | 0 | -2.685725 | 6.344904  | -0.627916 |
| 46 | 1  | 0 | -0.476630 | 6.716654  | 0.487834  |
| 47 | 1  | 0 | 1.132306  | 4.829385  | 0.737427  |
| 48 | 1  | 0 | -2.914348 | 0.338601  | 5.545742  |
| 49 | 1  | 0 | -4.463933 | 1.070208  | 3.689956  |
| 50 | 1  | 0 | -3.711691 | 0.812368  | 1.318345  |
| 51 | 1  | 0 | -0.051040 | -0.785736 | 2.501995  |
| 52 | 1  | 0 | -0.659956 | -0.613583 | 4.921039  |
| 53 | 6  | 0 | -1.982881 | -1.207694 | -2.359825 |
| 54 | 6  | 0 | -2.800140 | -1.124867 | -1.179378 |
| 55 | 6  | 0 | -4.129335 | -0.610903 | -1.258956 |
| 56 | 6  | 0 | -4.585505 | -0.087813 | -2.474947 |

|    |    |   |           |           |           |
|----|----|---|-----------|-----------|-----------|
| 57 | 6  | 0 | -3.766499 | -0.112978 | -3.641370 |
| 58 | 6  | 0 | -2.486277 | -0.674989 | -3.585495 |
| 59 | 1  | 0 | -1.089267 | -1.825807 | -2.378791 |
| 60 | 1  | 0 | -4.768014 | -0.601587 | -0.380533 |
| 61 | 1  | 0 | -5.578693 | 0.354159  | -2.524332 |
| 62 | 1  | 0 | -4.151406 | 0.281562  | -4.578396 |
| 63 | 1  | 0 | -1.881245 | -0.757263 | -4.486355 |
| 64 | 35 | 0 | -2.829247 | -3.280977 | 0.028077  |

-----

## int02

-----

| Center<br>Number | Atomic<br>Number | Atomic<br>Type | Coordinates (Angstroms) |           |           |
|------------------|------------------|----------------|-------------------------|-----------|-----------|
|                  |                  |                | X                       | Y         | Z         |
| 1                | 7                | 0              | 0.568010                | 2.206211  | -0.034096 |
| 2                | 7                | 0              | 1.918229                | 2.528555  | 0.255994  |
| 3                | 6                | 0              | 2.509696                | 1.342179  | 0.367791  |
| 4                | 7                | 0              | 1.574863                | 0.309777  | 0.147541  |
| 5                | 6                | 0              | 0.324586                | 0.864854  | -0.116839 |
| 6                | 7                | 0              | 3.835504                | 1.176396  | 0.719280  |
| 7                | 6                | 0              | 4.804092                | 0.425893  | -0.008418 |
| 8                | 6                | 0              | 6.050113                | 0.168892  | 0.607632  |
| 9                | 6                | 0              | 7.044722                | -0.540275 | -0.087384 |
| 10               | 6                | 0              | 6.805856                | -1.013784 | -1.394436 |
| 11               | 6                | 0              | 5.561026                | -0.756879 | -2.002335 |
| 12               | 6                | 0              | 4.563237                | -0.034629 | -1.322118 |
| 13               | 6                | 0              | -0.363435               | 3.285615  | -0.220779 |
| 14               | 6                | 0              | 1.817449                | -1.111794 | 0.244111  |
| 15               | 6                | 0              | 2.436667                | -1.638519 | 1.392181  |
| 16               | 6                | 0              | 2.659138                | -3.025397 | 1.477461  |
| 17               | 6                | 0              | 2.255289                | -3.875885 | 0.428376  |

|    |    |   |           |           |           |
|----|----|---|-----------|-----------|-----------|
| 18 | 6  | 0 | 1.625689  | -3.334726 | -0.710852 |
| 19 | 6  | 0 | 1.405774  | -1.948769 | -0.809330 |
| 20 | 6  | 0 | -1.398227 | 3.156386  | -1.168176 |
| 21 | 6  | 0 | -2.302770 | 4.221695  | -1.334392 |
| 22 | 6  | 0 | -2.166176 | 5.405151  | -0.580816 |
| 23 | 6  | 0 | -1.112990 | 5.523499  | 0.349180  |
| 24 | 6  | 0 | -0.206150 | 4.464106  | 0.533832  |
| 25 | 46 | 0 | -1.485773 | -0.198556 | -0.510189 |
| 26 | 7  | 0 | -1.816520 | -0.507432 | 1.535509  |
| 27 | 6  | 0 | -1.888791 | -1.766784 | 2.050759  |
| 28 | 6  | 0 | -2.096594 | -2.000380 | 3.418345  |
| 29 | 6  | 0 | -2.247624 | -0.902864 | 4.286607  |
| 30 | 6  | 0 | -2.179861 | 0.397243  | 3.750374  |
| 31 | 6  | 0 | -1.959206 | 0.557479  | 2.374795  |
| 32 | 1  | 0 | 4.190797  | 1.848477  | 1.391343  |
| 33 | 1  | 0 | 6.234033  | 0.519866  | 1.620391  |
| 34 | 1  | 0 | 8.001133  | -0.728167 | 0.394046  |
| 35 | 1  | 0 | 7.574371  | -1.566528 | -1.927568 |
| 36 | 1  | 0 | 5.366441  | -1.107160 | -3.012934 |
| 37 | 1  | 0 | 3.622025  | 0.180988  | -1.819536 |
| 38 | 1  | 0 | 2.736171  | -0.981870 | 2.203182  |
| 39 | 1  | 0 | 3.138199  | -3.438187 | 2.361031  |
| 40 | 1  | 0 | 2.427258  | -4.946605 | 0.498989  |
| 41 | 1  | 0 | 1.309864  | -3.986520 | -1.520919 |
| 42 | 1  | 0 | 0.920641  | -1.518456 | -1.680332 |
| 43 | 1  | 0 | -1.476123 | 2.247474  | -1.761780 |
| 44 | 1  | 0 | -3.105015 | 4.130802  | -2.062301 |
| 45 | 1  | 0 | -2.865495 | 6.225345  | -0.719785 |
| 46 | 1  | 0 | -0.998669 | 6.434154  | 0.931085  |
| 47 | 1  | 0 | 0.606116  | 4.545226  | 1.248279  |
| 48 | 1  | 0 | -2.414172 | -1.055626 | 5.348533  |
| 49 | 1  | 0 | -2.292485 | 1.274106  | 4.378814  |
| 50 | 1  | 0 | -1.896793 | 1.541540  | 1.926312  |

|    |   |   |           |           |           |
|----|---|---|-----------|-----------|-----------|
| 51 | 1 | 0 | -1.782081 | -2.582695 | 1.347527  |
| 52 | 1 | 0 | -2.141495 | -3.020359 | 3.784758  |
| 53 | 6 | 0 | -3.163827 | -2.295860 | -1.920247 |
| 54 | 6 | 0 | -3.188564 | -1.241525 | -0.965924 |
| 55 | 6 | 0 | -4.440896 | -0.953738 | -0.357674 |
| 56 | 6 | 0 | -5.610234 | -1.673151 | -0.688775 |
| 57 | 6 | 0 | -5.558302 | -2.719530 | -1.633573 |
| 58 | 6 | 0 | -4.326844 | -3.030228 | -2.245411 |
| 59 | 1 | 0 | -2.228967 | -2.562147 | -2.412288 |
| 60 | 1 | 0 | -4.514212 | -0.159133 | 0.383665  |
| 61 | 1 | 0 | -6.554903 | -1.420315 | -0.209161 |
| 62 | 1 | 0 | -6.456336 | -3.279800 | -1.885524 |
| 63 | 1 | 0 | -4.270263 | -3.838487 | -2.973333 |
| 64 | 8 | 0 | -1.168720 | 0.122386  | -2.502588 |
| 65 | 1 | 0 | -1.912339 | -0.285601 | -2.996477 |

-----

### int02-PhHOBOH

-----

| Center<br>Number | Atomic<br>Number | Atomic<br>Type | Coordinates (Angstroms) |           |           |
|------------------|------------------|----------------|-------------------------|-----------|-----------|
|                  |                  |                | X                       | Y         | Z         |
| 1                | 7                | 0              | -0.941876               | -0.815860 | 1.993113  |
| 2                | 7                | 0              | -2.193636               | -1.425268 | 2.264392  |
| 3                | 6                | 0              | -2.976066               | -0.992385 | 1.279254  |
| 4                | 7                | 0              | -2.247990               | -0.150528 | 0.413943  |
| 5                | 6                | 0              | -0.935160               | -0.041562 | 0.867996  |
| 6                | 7                | 0              | -4.322508               | -1.286056 | 1.184695  |
| 7                | 6                | 0              | -4.980048               | -1.838768 | 0.047324  |
| 8                | 6                | 0              | -6.393455               | -1.863259 | 0.039884  |
| 9                | 6                | 0              | -7.080872               | -2.426876 | -1.048725 |
| 10               | 6                | 0              | -6.371870               | -2.958074 | -2.146373 |
| 11               | 6                | 0              | -4.963354               | -2.929376 | -2.134045 |

|    |    |   |           |           |           |
|----|----|---|-----------|-----------|-----------|
| 12 | 6  | 0 | -4.264052 | -2.381860 | -1.042715 |
| 13 | 6  | 0 | 0.147979  | -1.073631 | 2.894652  |
| 14 | 6  | 0 | -2.765515 | 0.571200  | -0.726339 |
| 15 | 6  | 0 | -3.906367 | 1.380884  | -0.579533 |
| 16 | 6  | 0 | -4.394765 | 2.087869  | -1.693891 |
| 17 | 6  | 0 | -3.740615 | 1.991747  | -2.938891 |
| 18 | 6  | 0 | -2.592680 | 1.183903  | -3.068140 |
| 19 | 6  | 0 | -2.101165 | 0.467217  | -1.961979 |
| 20 | 6  | 0 | 1.459128  | -1.183081 | 2.390283  |
| 21 | 6  | 0 | 2.514006  | -1.418968 | 3.292066  |
| 22 | 6  | 0 | 2.262251  | -1.567903 | 4.671089  |
| 23 | 6  | 0 | 0.940556  | -1.479435 | 5.153437  |
| 24 | 6  | 0 | -0.123272 | -1.230649 | 4.267290  |
| 25 | 46 | 0 | 0.639526  | 1.078861  | -0.046658 |
| 26 | 7  | 0 | -0.042126 | 2.865100  | 0.809757  |
| 27 | 6  | 0 | -0.399061 | 3.923666  | 0.029166  |
| 28 | 6  | 0 | -0.873874 | 5.125150  | 0.575908  |
| 29 | 6  | 0 | -0.974749 | 5.250135  | 1.974247  |
| 30 | 6  | 0 | -0.597691 | 4.158002  | 2.778817  |
| 31 | 6  | 0 | -0.141294 | 2.982945  | 2.164442  |
| 32 | 1  | 0 | -4.810594 | -1.355900 | 2.071530  |
| 33 | 1  | 0 | -6.945234 | -1.442965 | 0.877499  |
| 34 | 1  | 0 | -8.167815 | -2.444418 | -1.041865 |
| 35 | 1  | 0 | -6.905705 | -3.387928 | -2.989327 |
| 36 | 1  | 0 | -4.403402 | -3.343893 | -2.968590 |
| 37 | 1  | 0 | -3.178061 | -2.397585 | -1.037954 |
| 38 | 1  | 0 | -4.400672 | 1.460929  | 0.383848  |
| 39 | 1  | 0 | -5.276230 | 2.714163  | -1.587334 |
| 40 | 1  | 0 | -4.119845 | 2.540825  | -3.796606 |
| 41 | 1  | 0 | -2.084013 | 1.107790  | -4.025322 |
| 42 | 1  | 0 | -1.219145 | -0.160064 | -2.047991 |
| 43 | 1  | 0 | 1.633956  | -1.087417 | 1.319864  |
| 44 | 1  | 0 | 3.530726  | -1.495247 | 2.915169  |

|    |   |   |           |           |           |
|----|---|---|-----------|-----------|-----------|
| 45 | 1 | 0 | 3.082360  | -1.755322 | 5.359055  |
| 46 | 1 | 0 | 0.737659  | -1.597518 | 6.214466  |
| 47 | 1 | 0 | -1.143037 | -1.155410 | 4.629440  |
| 48 | 1 | 0 | -1.334870 | 6.170532  | 2.423641  |
| 49 | 1 | 0 | -0.655008 | 4.207217  | 3.860889  |
| 50 | 1 | 0 | 0.153878  | 2.121025  | 2.750303  |
| 51 | 1 | 0 | -0.293754 | 3.792145  | -1.040049 |
| 52 | 1 | 0 | -1.151873 | 5.939017  | -0.085152 |
| 53 | 6 | 0 | 2.377222  | 1.911419  | -2.387389 |
| 54 | 6 | 0 | 2.152979  | 2.080324  | -0.993369 |
| 55 | 6 | 0 | 3.027182  | 2.963135  | -0.302862 |
| 56 | 6 | 0 | 4.076181  | 3.637828  | -0.965382 |
| 57 | 6 | 0 | 4.274069  | 3.458900  | -2.350714 |
| 58 | 6 | 0 | 3.415722  | 2.594182  | -3.059949 |
| 59 | 1 | 0 | 1.732957  | 1.248974  | -2.964246 |
| 60 | 1 | 0 | 2.894952  | 3.131945  | 0.765082  |
| 61 | 1 | 0 | 4.732362  | 4.301413  | -0.403752 |
| 62 | 1 | 0 | 5.077534  | 3.982281  | -2.864904 |
| 63 | 1 | 0 | 3.553976  | 2.448924  | -4.130533 |
| 64 | 8 | 0 | 1.305693  | -0.673980 | -0.862522 |
| 65 | 1 | 0 | 2.124949  | -0.499815 | -1.374006 |
| 66 | 6 | 0 | 5.999455  | -2.527361 | 0.030496  |
| 67 | 6 | 0 | 4.696130  | -3.056958 | 0.093077  |
| 68 | 6 | 0 | 3.868624  | -3.118604 | -1.058800 |
| 69 | 6 | 0 | 4.403882  | -2.634762 | -2.281701 |
| 70 | 6 | 0 | 5.703542  | -2.099825 | -2.350875 |
| 71 | 6 | 0 | 6.505079  | -2.044676 | -1.192753 |
| 72 | 1 | 0 | 6.615886  | -2.492490 | 0.925565  |
| 73 | 1 | 0 | 4.337213  | -3.432127 | 1.050379  |
| 74 | 1 | 0 | 3.792710  | -2.680383 | -3.179462 |
| 75 | 1 | 0 | 6.091186  | -1.731042 | -3.297685 |
| 76 | 1 | 0 | 7.510962  | -1.634307 | -1.243202 |
| 77 | 5 | 0 | 2.424540  | -3.710455 | -1.012940 |

|    |   |   |          |           |           |
|----|---|---|----------|-----------|-----------|
| 78 | 8 | 0 | 1.770845 | -3.960175 | -2.210388 |
| 79 | 1 | 0 | 0.862019 | -4.313584 | -2.162070 |
| 80 | 8 | 0 | 1.761183 | -4.078400 | 0.151647  |
| 81 | 1 | 0 | 2.129863 | -3.849330 | 1.023084  |

---

### TS3

---

| Center<br>Number | Atomic<br>Number | Atomic<br>Type | Coordinates (Angstroms) |           |           |
|------------------|------------------|----------------|-------------------------|-----------|-----------|
|                  |                  |                | X                       | Y         | Z         |
| 1                | 7                | 0              | -0.850413               | -0.814728 | 2.087268  |
| 2                | 7                | 0              | -2.129576               | -1.379392 | 2.324883  |
| 3                | 6                | 0              | -2.863083               | -0.946371 | 1.303937  |
| 4                | 7                | 0              | -2.079741               | -0.147872 | 0.446535  |
| 5                | 6                | 0              | -0.778736               | -0.069881 | 0.943600  |
| 6                | 7                | 0              | -4.213512               | -1.201676 | 1.168801  |
| 7                | 6                | 0              | -4.851260               | -1.752064 | 0.019030  |
| 8                | 6                | 0              | -6.263721               | -1.732137 | -0.033709 |
| 9                | 6                | 0              | -6.933862               | -2.291860 | -1.134991 |
| 10               | 6                | 0              | -6.207613               | -2.863330 | -2.200640 |
| 11               | 6                | 0              | -4.800043               | -2.879150 | -2.143049 |
| 12               | 6                | 0              | -4.118626               | -2.335825 | -1.038364 |
| 13               | 6                | 0              | 0.187410                | -1.082714 | 3.047093  |
| 14               | 6                | 0              | -2.546576               | 0.578489  | -0.712810 |
| 15               | 6                | 0              | -3.659574               | 1.430852  | -0.595050 |
| 16               | 6                | 0              | -4.101097               | 2.145576  | -1.723656 |
| 17               | 6                | 0              | -3.428189               | 2.015495  | -2.955396 |
| 18               | 6                | 0              | -2.309752               | 1.163832  | -3.056816 |
| 19               | 6                | 0              | -1.866947               | 0.438734  | -1.935807 |



|    |    |   |           |           |           |
|----|----|---|-----------|-----------|-----------|
| 20 | 6  | 0 | 1.528983  | -1.172563 | 2.626172  |
| 21 | 6  | 0 | 2.525227  | -1.430480 | 3.586615  |
| 22 | 6  | 0 | 2.189286  | -1.614130 | 4.943037  |
| 23 | 6  | 0 | 0.839345  | -1.538164 | 5.342235  |
| 24 | 6  | 0 | -0.167694 | -1.272440 | 4.396926  |
| 25 | 46 | 0 | 0.829610  | 1.043131  | 0.069231  |
| 26 | 7  | 0 | -0.047465 | 2.844944  | 0.671254  |
| 27 | 6  | 0 | -0.445400 | 3.766583  | -0.249860 |
| 28 | 6  | 0 | -1.028434 | 4.986378  | 0.123580  |
| 29 | 6  | 0 | -1.200852 | 5.274239  | 1.490603  |
| 30 | 6  | 0 | -0.784750 | 4.321454  | 2.439901  |
| 31 | 6  | 0 | -0.216876 | 3.118586  | 1.995637  |
| 32 | 1  | 0 | -4.732276 | -1.241864 | 2.039947  |
| 33 | 1  | 0 | -6.828189 | -1.280642 | 0.778795  |
| 34 | 1  | 0 | -8.020468 | -2.275121 | -1.163004 |
| 35 | 1  | 0 | -6.727814 | -3.290047 | -3.053635 |
| 36 | 1  | 0 | -4.227470 | -3.325368 | -2.952297 |
| 37 | 1  | 0 | -3.034455 | -2.386684 | -0.997629 |
| 38 | 1  | 0 | -4.169103 | 1.537838  | 0.357723  |
| 39 | 1  | 0 | -4.960583 | 2.804749  | -1.638126 |
| 40 | 1  | 0 | -3.770563 | 2.571096  | -3.824259 |
| 41 | 1  | 0 | -1.786995 | 1.059316  | -4.003577 |
| 42 | 1  | 0 | -1.011527 | -0.224677 | -2.005944 |
| 43 | 1  | 0 | 1.778452  | -1.041652 | 1.573717  |
| 44 | 1  | 0 | 3.563116  | -1.498739 | 3.270225  |
| 45 | 1  | 0 | 2.964939  | -1.818126 | 5.676353  |
| 46 | 1  | 0 | 0.569663  | -1.681354 | 6.385225  |
| 47 | 1  | 0 | -1.208046 | -1.210730 | 4.696606  |
| 48 | 1  | 0 | -1.645265 | 6.212946  | 1.806985  |
| 49 | 1  | 0 | -0.895658 | 4.498663  | 3.504264  |
| 50 | 1  | 0 | 0.111380  | 2.359339  | 2.694916  |
| 51 | 1  | 0 | -0.286124 | 3.510061  | -1.289378 |
| 52 | 1  | 0 | -1.334048 | 5.689081  | -0.644143 |

|    |   |   |           |           |           |
|----|---|---|-----------|-----------|-----------|
| 53 | 6 | 0 | 2.688112  | 1.875926  | -2.176665 |
| 54 | 6 | 0 | 2.359105  | 2.081370  | -0.809272 |
| 55 | 6 | 0 | 3.139539  | 3.026424  | -0.090755 |
| 56 | 6 | 0 | 4.202688  | 3.726447  | -0.702499 |
| 57 | 6 | 0 | 4.507432  | 3.510060  | -2.062811 |
| 58 | 6 | 0 | 3.741484  | 2.583409  | -2.798942 |
| 59 | 1 | 0 | 2.116273  | 1.165845  | -2.772666 |
| 60 | 1 | 0 | 2.922459  | 3.225081  | 0.958108  |
| 61 | 1 | 0 | 4.786413  | 4.438931  | -0.121279 |
| 62 | 1 | 0 | 5.322148  | 4.052601  | -2.537847 |
| 63 | 1 | 0 | 3.962859  | 2.408915  | -3.850947 |
| 64 | 8 | 0 | 1.751502  | -0.700629 | -0.516410 |
| 65 | 1 | 0 | 2.579174  | -0.460301 | -0.984344 |
| 66 | 6 | 0 | 5.510181  | -3.467160 | -0.305558 |
| 67 | 6 | 0 | 4.106705  | -3.458686 | -0.182104 |
| 68 | 6 | 0 | 3.270828  | -3.058126 | -1.256621 |
| 69 | 6 | 0 | 3.902559  | -2.679905 | -2.470509 |
| 70 | 6 | 0 | 5.304400  | -2.683648 | -2.602452 |
| 71 | 6 | 0 | 6.113732  | -3.076646 | -1.517393 |
| 72 | 1 | 0 | 6.127787  | -3.778268 | 0.534009  |
| 73 | 1 | 0 | 3.669246  | -3.772485 | 0.764874  |
| 74 | 1 | 0 | 3.285863  | -2.383376 | -3.315602 |
| 75 | 1 | 0 | 5.763676  | -2.385770 | -3.542540 |
| 76 | 1 | 0 | 7.196986  | -3.081778 | -1.615438 |
| 77 | 5 | 0 | 1.704377  | -3.063991 | -1.140981 |
| 78 | 8 | 0 | 0.965538  | -3.009547 | -2.326035 |
| 79 | 1 | 0 | -0.005021 | -3.052791 | -2.229527 |
| 80 | 8 | 0 | 1.007044  | -3.484580 | -0.002174 |
| 81 | 1 | 0 | 1.427909  | -3.391109 | 0.870645  |

-----  
**int03**  
-----

| Center<br>Number | Atomic<br>Number | Atomic<br>Type | Coordinates (Angstroms) |           |           |
|------------------|------------------|----------------|-------------------------|-----------|-----------|
|                  |                  |                | X                       | Y         | Z         |
| 1                | 7                | 0              | 0.637823                | -0.032132 | 2.243009  |
| 2                | 7                | 0              | 1.982079                | 0.131072  | 2.660364  |
| 3                | 6                | 0              | 2.688818                | -0.236402 | 1.596531  |
| 4                | 7                | 0              | 1.831773                | -0.618753 | 0.548110  |
| 5                | 6                | 0              | 0.514508                | -0.442323 | 0.945264  |
| 6                | 7                | 0              | 4.069684                | -0.257333 | 1.543535  |
| 7                | 6                | 0              | 4.843104                | 0.476257  | 0.596490  |
| 8                | 6                | 0              | 6.228189                | 0.210233  | 0.505811  |
| 9                | 6                | 0              | 7.024095                | 0.936866  | -0.397048 |
| 10               | 6                | 0              | 6.448685                | 1.921905  | -1.226590 |
| 11               | 6                | 0              | 5.066108                | 2.178959  | -1.132166 |
| 12               | 6                | 0              | 4.259369                | 1.470587  | -0.222224 |
| 13               | 6                | 0              | -0.400030               | 0.247988  | 3.195884  |
| 14               | 6                | 0              | 2.233158                | -1.202615 | -0.712191 |
| 15               | 6                | 0              | 3.096382                | -2.315140 | -0.703934 |
| 16               | 6                | 0              | 3.469807                | -2.906508 | -1.924279 |
| 17               | 6                | 0              | 2.971559                | -2.396089 | -3.140599 |
| 18               | 6                | 0              | 2.102370                | -1.286986 | -3.129707 |
| 19               | 6                | 0              | 1.730607                | -0.677953 | -1.915798 |
| 20               | 6                | 0              | -1.626179               | 0.794955  | 2.770831  |
| 21               | 6                | 0              | -2.631929               | 1.042395  | 3.723071  |
| 22               | 6                | 0              | -2.412085               | 0.768887  | 5.087654  |
| 23               | 6                | 0              | -1.171118               | 0.242271  | 5.500871  |
| 24               | 6                | 0              | -0.161321               | -0.020930 | 4.558343  |
| 25               | 46               | 0              | -1.234424               | -0.771016 | -0.220902 |
| 26               | 7                | 0              | -1.132136               | -2.809125 | 0.096834  |
| 27               | 6                | 0              | -0.782588               | -3.648117 | -0.917692 |
| 28               | 6                | 0              | -0.698579               | -5.035314 | -0.731570 |
| 29               | 6                | 0              | -0.989659               | -5.577076 | 0.534651  |
| 30               | 6                | 0              | -1.353150               | -4.704348 | 1.577727  |

|    |   |   |           |           |           |
|----|---|---|-----------|-----------|-----------|
| 31 | 6 | 0 | -1.412708 | -3.326500 | 1.325622  |
| 32 | 1 | 0 | 4.543362  | -0.578334 | 2.380932  |
| 33 | 1 | 0 | 6.673917  | -0.557887 | 1.133650  |
| 34 | 1 | 0 | 8.089618  | 0.728787  | -0.456135 |
| 35 | 1 | 0 | 7.065181  | 2.478275  | -1.927303 |
| 36 | 1 | 0 | 4.612025  | 2.942249  | -1.759606 |
| 37 | 1 | 0 | 3.199896  | 1.704286  | -0.141809 |
| 38 | 1 | 0 | 3.465519  | -2.714145 | 0.236035  |
| 39 | 1 | 0 | 4.135755  | -3.765256 | -1.923231 |
| 40 | 1 | 0 | 3.256695  | -2.857665 | -4.082413 |
| 41 | 1 | 0 | 1.717604  | -0.888904 | -4.065322 |
| 42 | 1 | 0 | 1.078975  | 0.193224  | -1.909774 |
| 43 | 1 | 0 | -1.780824 | 1.031914  | 1.723454  |
| 44 | 1 | 0 | -3.580733 | 1.461766  | 3.398454  |
| 45 | 1 | 0 | -3.191687 | 0.967824  | 5.818019  |
| 46 | 1 | 0 | -0.990340 | 0.032030  | 6.551638  |
| 47 | 1 | 0 | 0.793807  | -0.430931 | 4.867945  |
| 48 | 1 | 0 | -0.935801 | -6.648091 | 0.703422  |
| 49 | 1 | 0 | -1.586400 | -5.075421 | 2.569778  |
| 50 | 1 | 0 | -1.685617 | -2.620861 | 2.100662  |
| 51 | 1 | 0 | -0.575400 | -3.191101 | -1.876798 |
| 52 | 1 | 0 | -0.414970 | -5.668465 | -1.565204 |
| 53 | 6 | 0 | -3.023330 | -0.659549 | -2.676356 |
| 54 | 6 | 0 | -2.941444 | -1.064320 | -1.318280 |
| 55 | 6 | 0 | -4.096866 | -1.649789 | -0.737862 |
| 56 | 6 | 0 | -5.287798 | -1.816607 | -1.477870 |
| 57 | 6 | 0 | -5.348715 | -1.410090 | -2.827352 |
| 58 | 6 | 0 | -4.209890 | -0.833627 | -3.424836 |
| 59 | 1 | 0 | -2.161484 | -0.211180 | -3.167457 |
| 60 | 1 | 0 | -4.077381 | -1.981967 | 0.299435  |
| 61 | 1 | 0 | -6.160699 | -2.263282 | -1.004436 |
| 62 | 1 | 0 | -6.263964 | -1.541287 | -3.400568 |
| 63 | 1 | 0 | -4.242530 | -0.518171 | -4.466501 |

|    |   |   |           |          |           |
|----|---|---|-----------|----------|-----------|
| 64 | 8 | 0 | -1.480367 | 1.291164 | -0.568156 |
| 65 | 1 | 0 | -2.332509 | 1.428561 | -1.024825 |
| 66 | 6 | 0 | -2.675096 | 5.438014 | 0.429276  |
| 67 | 6 | 0 | -2.001643 | 4.203027 | 0.336596  |
| 68 | 6 | 0 | -1.269354 | 3.828343 | -0.823736 |
| 69 | 6 | 0 | -1.258585 | 4.757520 | -1.895433 |
| 70 | 6 | 0 | -1.926865 | 5.997758 | -1.816887 |
| 71 | 6 | 0 | -2.638963 | 6.344156 | -0.650806 |
| 72 | 1 | 0 | -3.225238 | 5.691334 | 1.333737  |
| 73 | 1 | 0 | -2.050864 | 3.518204 | 1.182937  |
| 74 | 1 | 0 | -0.721923 | 4.502629 | -2.807745 |
| 75 | 1 | 0 | -1.895289 | 6.687075 | -2.658890 |
| 76 | 1 | 0 | -3.157555 | 7.298475 | -0.585510 |
| 77 | 5 | 0 | -0.450629 | 2.421452 | -0.905666 |
| 78 | 8 | 0 | 0.072912  | 2.103036 | -2.255365 |
| 79 | 1 | 0 | 0.894410  | 2.582240 | -2.474647 |
| 80 | 8 | 0 | 0.674494  | 2.354267 | 0.056807  |
| 81 | 1 | 0 | 0.527005  | 2.840704 | 0.890183  |

-----

**TS4**

-----

| Center<br>Number | Atomic<br>Number | Atomic<br>Type | Coordinates (Angstroms) |          |           |
|------------------|------------------|----------------|-------------------------|----------|-----------|
|                  |                  |                | X                       | Y        | Z         |
| 1                | 7                | 0              | 0.925681                | 1.899398 | -0.978625 |
| 2                | 7                | 0              | 2.240884                | 2.374252 | -0.771506 |
| 3                | 6                | 0              | 2.850771                | 1.372124 | -0.147291 |
| 4                | 7                | 0              | 1.961136                | 0.291977 | 0.021536  |
| 5                | 6                | 0              | 0.710366                | 0.625766 | -0.512412 |
| 6                | 7                | 0              | 4.143947                | 1.440335 | 0.330853  |
| 7                | 6                | 0              | 5.195747                | 0.522124 | 0.039294  |
| 8                | 6                | 0              | 6.375573                | 0.589781 | 0.814384  |

|    |    |   |           |           |           |
|----|----|---|-----------|-----------|-----------|
| 9  | 6  | 0 | 7.450705  | -0.270711 | 0.533256  |
| 10 | 6  | 0 | 7.357793  | -1.215476 | -0.510148 |
| 11 | 6  | 0 | 6.178231  | -1.279361 | -1.277803 |
| 12 | 6  | 0 | 5.101666  | -0.412208 | -1.015373 |
| 13 | 6  | 0 | -0.010896 | 2.800824  | -1.597588 |
| 14 | 6  | 0 | 2.271544  | -0.927304 | 0.740041  |
| 15 | 6  | 0 | 2.640454  | -0.840855 | 2.095712  |
| 16 | 6  | 0 | 2.968387  | -2.014667 | 2.796857  |
| 17 | 6  | 0 | 2.924100  | -3.264424 | 2.146144  |
| 18 | 6  | 0 | 2.555027  | -3.335496 | 0.788448  |
| 19 | 6  | 0 | 2.230801  | -2.165380 | 0.076445  |
| 20 | 6  | 0 | -1.094189 | 2.303277  | -2.345456 |
| 21 | 6  | 0 | -1.998829 | 3.215842  | -2.920447 |
| 22 | 6  | 0 | -1.821364 | 4.604956  | -2.765819 |
| 23 | 6  | 0 | -0.719730 | 5.085987  | -2.029356 |
| 24 | 6  | 0 | 0.189385  | 4.187884  | -1.443624 |
| 25 | 46 | 0 | -1.303330 | -0.108929 | 0.094915  |
| 26 | 7  | 0 | -1.074104 | 1.405404  | 1.616065  |
| 27 | 6  | 0 | -0.430293 | 1.094638  | 2.774232  |
| 28 | 6  | 0 | -0.304365 | 2.015607  | 3.824831  |
| 29 | 6  | 0 | -0.862043 | 3.300137  | 3.678303  |
| 30 | 6  | 0 | -1.531739 | 3.614975  | 2.481059  |
| 31 | 6  | 0 | -1.621103 | 2.642721  | 1.472988  |
| 32 | 1  | 0 | 4.420360  | 2.346547  | 0.694773  |
| 33 | 1  | 0 | 6.446320  | 1.307380  | 1.628272  |
| 34 | 1  | 0 | 8.355580  | -0.207524 | 1.132386  |
| 35 | 1  | 0 | 8.188225  | -1.883161 | -0.722046 |
| 36 | 1  | 0 | 6.096597  | -1.995320 | -2.091753 |
| 37 | 1  | 0 | 4.214605  | -0.451368 | -1.641069 |
| 38 | 1  | 0 | 2.678418  | 0.124557  | 2.591248  |
| 39 | 1  | 0 | 3.253964  | -1.952929 | 3.843234  |
| 40 | 1  | 0 | 3.177629  | -4.170377 | 2.689958  |
| 41 | 1  | 0 | 2.523417  | -4.296266 | 0.281828  |

|    |   |   |           |           |           |
|----|---|---|-----------|-----------|-----------|
| 42 | 1 | 0 | 1.956144  | -2.212760 | -0.972970 |
| 43 | 1 | 0 | -1.231790 | 1.239851  | -2.518134 |
| 44 | 1 | 0 | -2.835454 | 2.835712  | -3.501010 |
| 45 | 1 | 0 | -2.523729 | 5.300715  | -3.217002 |
| 46 | 1 | 0 | -0.568342 | 6.155179  | -1.907523 |
| 47 | 1 | 0 | 1.036818  | 4.551043  | -0.873536 |
| 48 | 1 | 0 | -0.780301 | 4.032725  | 4.475467  |
| 49 | 1 | 0 | -1.980472 | 4.590014  | 2.324640  |
| 50 | 1 | 0 | -2.136651 | 2.841798  | 0.542114  |
| 51 | 1 | 0 | -0.024620 | 0.093431  | 2.852025  |
| 52 | 1 | 0 | 0.216260  | 1.725714  | 4.731221  |
| 53 | 6 | 0 | -3.275042 | -1.239061 | 2.086537  |
| 54 | 6 | 0 | -3.122770 | -0.378249 | 0.974386  |
| 55 | 6 | 0 | -4.230997 | 0.407408  | 0.577256  |
| 56 | 6 | 0 | -5.461958 | 0.328667  | 1.264865  |
| 57 | 6 | 0 | -5.605067 | -0.538226 | 2.368433  |
| 58 | 6 | 0 | -4.504628 | -1.320126 | 2.777091  |
| 59 | 1 | 0 | -2.442994 | -1.856532 | 2.419371  |
| 60 | 1 | 0 | -4.148689 | 1.078998  | -0.276290 |
| 61 | 1 | 0 | -6.302403 | 0.939351  | 0.938502  |
| 62 | 1 | 0 | -6.552537 | -0.601442 | 2.899311  |
| 63 | 1 | 0 | -4.600397 | -1.990373 | 3.630098  |
| 64 | 6 | 0 | -1.837635 | -1.912814 | -1.138748 |
| 65 | 6 | 0 | -3.241191 | -2.044446 | -1.402572 |
| 66 | 1 | 0 | -3.750616 | -1.232527 | -1.917625 |
| 67 | 5 | 0 | -1.009680 | -1.647379 | -2.895642 |
| 68 | 8 | 0 | 0.389232  | -1.382349 | -2.654068 |
| 69 | 1 | 0 | 0.516209  | -0.689672 | -1.971508 |
| 70 | 8 | 0 | -1.225023 | -2.907786 | -3.587641 |
| 71 | 1 | 0 | -0.690247 | -3.651903 | -3.252412 |
| 72 | 6 | 0 | -1.244176 | -3.013464 | -0.435255 |
| 73 | 6 | 0 | -3.975219 | -3.194448 | -1.072578 |
| 74 | 6 | 0 | -3.336782 | -4.261167 | -0.404209 |

|    |   |   |           |           |           |
|----|---|---|-----------|-----------|-----------|
| 75 | 1 | 0 | -3.898379 | -5.156483 | -0.144101 |
| 76 | 6 | 0 | -1.968328 | -4.164231 | -0.073024 |
| 77 | 1 | 0 | -1.475885 | -4.981803 | 0.449830  |
| 78 | 1 | 0 | -5.032137 | -3.263864 | -1.322018 |
| 79 | 1 | 0 | -0.182520 | -2.981055 | -0.207759 |
| 80 | 8 | 0 | -1.734430 | -0.571383 | -3.548463 |
| 81 | 1 | 0 | -2.555085 | -0.851040 | -3.995446 |

-----

#### int04

-----

| Center<br>Number | Atomic<br>Number | Atomic<br>Type | Coordinates (Angstroms) |           |           |
|------------------|------------------|----------------|-------------------------|-----------|-----------|
|                  |                  |                | X                       | Y         | Z         |
| 1                | 7                | 0              | -0.631686               | 2.196200  | -0.530125 |
| 2                | 7                | 0              | -2.001836               | 2.489520  | -0.758280 |
| 3                | 6                | 0              | -2.595799               | 1.303982  | -0.712479 |
| 4                | 7                | 0              | -1.651802               | 0.295260  | -0.439272 |
| 5                | 6                | 0              | -0.385266               | 0.865833  | -0.299153 |
| 6                | 7                | 0              | -3.935439               | 1.109310  | -0.980198 |
| 7                | 6                | 0              | -4.859765               | 0.391763  | -0.165413 |
| 8                | 6                | 0              | -6.117535               | 0.057559  | -0.716893 |
| 9                | 6                | 0              | -7.069928               | -0.618447 | 0.064967  |
| 10               | 6                | 0              | -6.775916               | -0.982132 | 1.395814  |
| 11               | 6                | 0              | -5.519646               | -0.648440 | 1.939184  |
| 12               | 6                | 0              | -4.564311               | 0.042207  | 1.170939  |
| 13               | 6                | 0              | 0.289516                | 3.302116  | -0.587633 |
| 14               | 6                | 0              | -1.910452               | -1.128775 | -0.460125 |
| 15               | 6                | 0              | -2.451715               | -1.706529 | -1.623435 |
| 16               | 6                | 0              | -2.703970               | -3.090452 | -1.652160 |
| 17               | 6                | 0              | -2.407960               | -3.888931 | -0.528804 |
| 18               | 6                | 0              | -1.860677               | -3.297370 | 0.627542  |
| 19               | 6                | 0              | -1.612834               | -1.912865 | 0.667444  |



|    |    |   |           |           |           |
|----|----|---|-----------|-----------|-----------|
| 20 | 6  | 0 | 1.680711  | 3.093109  | -0.498259 |
| 21 | 6  | 0 | 2.554019  | 4.190610  | -0.576041 |
| 22 | 6  | 0 | 2.053630  | 5.496772  | -0.744791 |
| 23 | 6  | 0 | 0.661701  | 5.695158  | -0.832657 |
| 24 | 6  | 0 | -0.223413 | 4.604881  | -0.756822 |
| 25 | 46 | 0 | 1.399600  | -0.201440 | 0.137596  |
| 26 | 7  | 0 | 1.629984  | -0.718371 | -1.988427 |
| 27 | 6  | 0 | 1.631361  | -2.032577 | -2.342697 |
| 28 | 6  | 0 | 1.747539  | -2.449593 | -3.677939 |
| 29 | 6  | 0 | 1.880744  | -1.477726 | -4.687834 |
| 30 | 6  | 0 | 1.886353  | -0.118487 | -4.320959 |
| 31 | 6  | 0 | 1.754151  | 0.221501  | -2.965219 |
| 32 | 1  | 0 | -4.330278 | 1.736974  | -1.672873 |
| 33 | 1  | 0 | -6.343485 | 0.323558  | -1.746809 |
| 34 | 1  | 0 | -8.036048 | -0.866720 | -0.367132 |
| 35 | 1  | 0 | -7.511734 | -1.509863 | 1.996186  |
| 36 | 1  | 0 | -5.283344 | -0.913895 | 2.966565  |
| 37 | 1  | 0 | -3.613523 | 0.319933  | 1.616552  |
| 38 | 1  | 0 | -2.669760 | -1.089174 | -2.489962 |
| 39 | 1  | 0 | -3.122685 | -3.541414 | -2.547712 |
| 40 | 1  | 0 | -2.602089 | -4.957896 | -0.554541 |
| 41 | 1  | 0 | -1.631548 | -3.908114 | 1.496663  |
| 42 | 1  | 0 | -1.196565 | -1.449180 | 1.554902  |
| 43 | 1  | 0 | 2.070960  | 2.088106  | -0.350980 |
| 44 | 1  | 0 | 3.625291  | 4.021472  | -0.504985 |
| 45 | 1  | 0 | 2.733933  | 6.341719  | -0.805912 |
| 46 | 1  | 0 | 0.260643  | 6.697145  | -0.960445 |
| 47 | 1  | 0 | -1.293209 | 4.755997  | -0.825958 |
| 48 | 1  | 0 | 1.977636  | -1.770400 | -5.729050 |
| 49 | 1  | 0 | 1.987194  | 0.666225  | -5.063258 |
| 50 | 1  | 0 | 1.745086  | 1.258342  | -2.650811 |
| 51 | 1  | 0 | 1.547827  | -2.749062 | -1.534820 |
| 52 | 1  | 0 | 1.739058  | -3.508903 | -3.912007 |

|    |   |   |          |           |          |
|----|---|---|----------|-----------|----------|
| 53 | 6 | 0 | 3.080909 | -2.646665 | 0.845510 |
| 54 | 6 | 0 | 3.114294 | -1.249588 | 0.582224 |
| 55 | 6 | 0 | 4.399396 | -0.640130 | 0.558669 |
| 56 | 6 | 0 | 5.582645 | -1.379846 | 0.783168 |
| 57 | 6 | 0 | 5.518419 | -2.765735 | 1.038256 |
| 58 | 6 | 0 | 4.257199 | -3.396627 | 1.067023 |
| 59 | 1 | 0 | 2.124407 | -3.168773 | 0.885583 |
| 60 | 1 | 0 | 4.488210 | 0.429202  | 0.366352 |
| 61 | 1 | 0 | 6.548162 | -0.875675 | 0.759178 |
| 62 | 1 | 0 | 6.427241 | -3.338618 | 1.211605 |
| 63 | 1 | 0 | 4.188979 | -4.466063 | 1.263665 |
| 64 | 6 | 0 | 1.213865 | 0.177154  | 2.147597 |
| 65 | 6 | 0 | 1.198477 | 1.496974  | 2.675303 |
| 66 | 6 | 0 | 1.038350 | -0.880489 | 3.082558 |
| 67 | 6 | 0 | 1.018559 | 1.748616  | 4.054391 |
| 68 | 1 | 0 | 1.327892 | 2.350015  | 2.013174 |
| 69 | 6 | 0 | 0.845695 | -0.637496 | 4.459960 |
| 70 | 1 | 0 | 1.063952 | -1.912848 | 2.739469 |
| 71 | 6 | 0 | 0.836812 | 0.682107  | 4.957782 |
| 72 | 1 | 0 | 1.017357 | 2.775678  | 4.417693 |
| 73 | 1 | 0 | 0.709844 | -1.476890 | 5.140946 |
| 74 | 1 | 0 | 0.693494 | 0.873315  | 6.019284 |

-----

**TS5**

-----

| Center<br>Number | Atomic<br>Number | Atomic<br>Type | Coordinates (Angstroms) |          |           |
|------------------|------------------|----------------|-------------------------|----------|-----------|
|                  |                  |                | X                       | Y        | Z         |
| 1                | 7                | 0              | -0.759546               | 1.981008 | -1.058414 |
| 2                | 7                | 0              | -2.135922               | 2.243634 | -1.294625 |
| 3                | 6                | 0              | -2.735355               | 1.104231 | -0.973025 |
| 4                | 7                | 0              | -1.789557               | 0.161793 | -0.525775 |

|    |    |   |           |           |           |
|----|----|---|-----------|-----------|-----------|
| 5  | 6  | 0 | -0.503288 | 0.725289  | -0.550723 |
| 6  | 7  | 0 | -4.088837 | 0.879671  | -1.141318 |
| 7  | 6  | 0 | -4.988106 | 0.387956  | -0.152387 |
| 8  | 6  | 0 | -6.280390 | -0.011607 | -0.564216 |
| 9  | 6  | 0 | -7.210388 | -0.469993 | 0.384561  |
| 10 | 6  | 0 | -6.861441 | -0.550283 | 1.749015  |
| 11 | 6  | 0 | -5.571735 | -0.152597 | 2.153439  |
| 12 | 6  | 0 | -4.637470 | 0.322641  | 1.214679  |
| 13 | 6  | 0 | 0.173706  | 3.029761  | -1.361261 |
| 14 | 6  | 0 | -2.056806 | -1.224490 | -0.219265 |
| 15 | 6  | 0 | -2.675072 | -2.036730 | -1.188063 |
| 16 | 6  | 0 | -2.927451 | -3.389868 | -0.895185 |
| 17 | 6  | 0 | -2.552547 | -3.927974 | 0.352421  |
| 18 | 6  | 0 | -1.926190 | -3.105633 | 1.310786  |
| 19 | 6  | 0 | -1.679715 | -1.749564 | 1.029054  |
| 20 | 6  | 0 | 1.543596  | 2.742624  | -1.526565 |
| 21 | 6  | 0 | 2.438574  | 3.783081  | -1.829867 |
| 22 | 6  | 0 | 1.976767  | 5.105939  | -1.980111 |
| 23 | 6  | 0 | 0.603455  | 5.380832  | -1.822170 |
| 24 | 6  | 0 | -0.301454 | 4.348934  | -1.514715 |
| 25 | 46 | 0 | 1.313049  | -0.170599 | 0.130370  |
| 26 | 7  | 0 | 1.694599  | -1.422636 | -1.807250 |
| 27 | 6  | 0 | 2.619542  | -2.422234 | -1.796650 |
| 28 | 6  | 0 | 2.921387  | -3.185245 | -2.937745 |
| 29 | 6  | 0 | 2.249219  | -2.905991 | -4.143254 |
| 30 | 6  | 0 | 1.294025  | -1.871196 | -4.159296 |
| 31 | 6  | 0 | 1.045005  | -1.158533 | -2.974378 |
| 32 | 1  | 0 | -4.503676 | 1.338939  | -1.945299 |
| 33 | 1  | 0 | -6.549628 | 0.035155  | -1.616876 |
| 34 | 1  | 0 | -8.202735 | -0.770123 | 0.057317  |
| 35 | 1  | 0 | -7.580381 | -0.910319 | 2.479702  |
| 36 | 1  | 0 | -5.292056 | -0.199393 | 3.202971  |
| 37 | 1  | 0 | -3.659735 | 0.656046  | 1.550094  |

|    |   |   |           |           |           |
|----|---|---|-----------|-----------|-----------|
| 38 | 1 | 0 | -2.951558 | -1.621158 | -2.152571 |
| 39 | 1 | 0 | -3.406353 | -4.019714 | -1.639963 |
| 40 | 1 | 0 | -2.745603 | -4.974129 | 0.574498  |
| 41 | 1 | 0 | -1.635957 | -3.514970 | 2.274693  |
| 42 | 1 | 0 | -1.206757 | -1.106200 | 1.762906  |
| 43 | 1 | 0 | 1.898367  | 1.722468  | -1.408687 |
| 44 | 1 | 0 | 3.494323  | 3.556853  | -1.955487 |
| 45 | 1 | 0 | 2.672531  | 5.906135  | -2.217593 |
| 46 | 1 | 0 | 0.234289  | 6.396788  | -1.935836 |
| 47 | 1 | 0 | -1.357871 | 4.556434  | -1.394063 |
| 48 | 1 | 0 | 2.462832  | -3.476838 | -5.042247 |
| 49 | 1 | 0 | 0.750760  | -1.618717 | -5.064236 |
| 50 | 1 | 0 | 0.314054  | -0.358123 | -2.947900 |
| 51 | 1 | 0 | 3.117045  | -2.605698 | -0.850373 |
| 52 | 1 | 0 | 3.664230  | -3.974134 | -2.876908 |
| 53 | 6 | 0 | 2.975262  | -2.052914 | 1.803094  |
| 54 | 6 | 0 | 2.984702  | -0.730610 | 1.263621  |
| 55 | 6 | 0 | 4.249082  | -0.220853 | 0.837676  |
| 56 | 6 | 0 | 5.422405  | -0.991980 | 0.921043  |
| 57 | 6 | 0 | 5.385274  | -2.301733 | 1.449510  |
| 58 | 6 | 0 | 4.149524  | -2.823895 | 1.890127  |
| 59 | 1 | 0 | 2.042116  | -2.482121 | 2.162735  |
| 60 | 1 | 0 | 4.315264  | 0.790727  | 0.441888  |
| 61 | 1 | 0 | 6.365819  | -0.572783 | 0.575229  |
| 62 | 1 | 0 | 6.293421  | -2.895720 | 1.519813  |
| 63 | 1 | 0 | 4.100410  | -3.831592 | 2.299289  |
| 64 | 6 | 0 | 1.792909  | 0.531721  | 2.062400  |
| 65 | 6 | 0 | 2.273091  | 1.874784  | 2.165546  |
| 66 | 6 | 0 | 1.044123  | 0.039011  | 3.175743  |
| 67 | 6 | 0 | 1.994891  | 2.676667  | 3.286818  |
| 68 | 1 | 0 | 2.866721  | 2.297135  | 1.357718  |
| 69 | 6 | 0 | 0.767063  | 0.840907  | 4.297406  |
| 70 | 1 | 0 | 0.687477  | -0.988953 | 3.172031  |

|    |   |   |          |          |          |
|----|---|---|----------|----------|----------|
| 71 | 6 | 0 | 1.235577 | 2.171242 | 4.365387 |
| 72 | 1 | 0 | 2.368640 | 3.699034 | 3.318415 |
| 73 | 1 | 0 | 0.185147 | 0.426926 | 5.119488 |
| 74 | 1 | 0 | 1.022842 | 2.791113 | 5.233196 |

-----

**Ph-Ph\_lin**

-----

| Center<br>Number | Atomic<br>Number | Atomic<br>Type | Coordinates (Angstroms) |           |           |
|------------------|------------------|----------------|-------------------------|-----------|-----------|
|                  |                  |                | X                       | Y         | Z         |
| 1                | 6                | 0              | 0.000000                | 1.210930  | 1.491197  |
| 2                | 6                | 0              | 0.000000                | 0.000000  | 0.750279  |
| 3                | 6                | 0              | 0.000000                | -1.210930 | 1.491197  |
| 4                | 6                | 0              | 0.000000                | -1.213033 | 2.897154  |
| 5                | 6                | 0              | 0.000000                | 0.000000  | 3.613275  |
| 6                | 6                | 0              | 0.000000                | 1.213033  | 2.897154  |
| 7                | 1                | 0              | 0.000000                | 2.169215  | 0.982474  |
| 8                | 1                | 0              | 0.000000                | -2.169215 | 0.982474  |
| 9                | 1                | 0              | 0.000000                | -2.160548 | 3.430642  |
| 10               | 1                | 0              | 0.000000                | 0.000000  | 4.700317  |
| 11               | 1                | 0              | 0.000000                | 2.160548  | 3.430642  |
| 12               | 6                | 0              | 0.000000                | 0.000000  | -0.750279 |
| 13               | 6                | 0              | 0.000000                | 1.210930  | -1.491197 |
| 14               | 6                | 0              | 0.000000                | -1.210930 | -1.491197 |
| 15               | 6                | 0              | 0.000000                | 1.213033  | -2.897154 |
| 16               | 1                | 0              | 0.000000                | 2.169215  | -0.982474 |
| 17               | 6                | 0              | 0.000000                | -1.213033 | -2.897154 |
| 18               | 1                | 0              | 0.000000                | -2.169215 | -0.982474 |
| 19               | 6                | 0              | 0.000000                | 0.000000  | -3.613275 |
| 20               | 1                | 0              | 0.000000                | 2.160548  | -3.430642 |
| 21               | 1                | 0              | 0.000000                | -2.160548 | -3.430642 |
| 22               | 1                | 0              | 0.000000                | 0.000000  | -4.700317 |

-----  
**Cat-Pd0**  
-----

| Center<br>Number | Atomic<br>Number | Atomic<br>Type | Coordinates (Angstroms) |           |           |
|------------------|------------------|----------------|-------------------------|-----------|-----------|
|                  |                  |                | X                       | Y         | Z         |
| 1                | 7                | 0              | -0.060561               | 2.109584  | -0.168455 |
| 2                | 7                | 0              | -1.417790               | 2.495711  | -0.313860 |
| 3                | 6                | 0              | -2.071090               | 1.346710  | -0.424834 |
| 4                | 7                | 0              | -1.181164               | 0.262921  | -0.337560 |
| 5                | 6                | 0              | 0.136383                | 0.737731  | -0.165554 |
| 6                | 7                | 0              | -3.430498               | 1.265310  | -0.669272 |
| 7                | 6                | 0              | -4.376550               | 0.518582  | 0.087980  |
| 8                | 6                | 0              | -5.682386               | 0.370021  | -0.434118 |
| 9                | 6                | 0              | -6.656369               | -0.332425 | 0.295830  |
| 10               | 6                | 0              | -6.340105               | -0.906658 | 1.544936  |
| 11               | 6                | 0              | -5.037099               | -0.757055 | 2.059698  |
| 12               | 6                | 0              | -4.057667               | -0.043256 | 1.344616  |
| 13               | 6                | 0              | 0.910745                | 3.161759  | -0.065562 |
| 14               | 6                | 0              | -1.521116               | -1.127163 | -0.528474 |
| 15               | 6                | 0              | -2.173259               | -1.522563 | -1.710908 |
| 16               | 6                | 0              | -2.495602               | -2.879462 | -1.902572 |
| 17               | 6                | 0              | -2.158731               | -3.834290 | -0.922377 |
| 18               | 6                | 0              | -1.499835               | -3.426969 | 0.255839  |
| 19               | 6                | 0              | -1.181179               | -2.071679 | 0.457629  |
| 20               | 6                | 0              | 2.199374                | 2.909654  | 0.448696  |
| 21               | 6                | 0              | 3.132197                | 3.958655  | 0.530354  |
| 22               | 6                | 0              | 2.788337                | 5.260693  | 0.115070  |

|    |    |   |           |           |           |
|----|----|---|-----------|-----------|-----------|
| 23 | 6  | 0 | 1.493759  | 5.505407  | -0.385617 |
| 24 | 6  | 0 | 0.553070  | 4.463957  | -0.476939 |
| 25 | 46 | 0 | 1.781778  | -0.370749 | -0.005980 |
| 26 | 7  | 0 | 3.511246  | -1.592498 | 0.122660  |
| 27 | 6  | 0 | 3.416158  | -2.949791 | -0.010680 |
| 28 | 6  | 0 | 4.530960  | -3.796598 | 0.085527  |
| 29 | 6  | 0 | 5.799332  | -3.235308 | 0.328659  |
| 30 | 6  | 0 | 5.903064  | -1.837794 | 0.466474  |
| 31 | 6  | 0 | 4.744932  | -1.052716 | 0.357805  |
| 32 | 1  | 0 | -3.802046 | 1.991494  | -1.272540 |
| 33 | 1  | 0 | -5.928095 | 0.799247  | -1.402680 |
| 34 | 1  | 0 | -7.658013 | -0.436366 | -0.113871 |
| 35 | 1  | 0 | -7.093370 | -1.453942 | 2.104820  |
| 36 | 1  | 0 | -4.781297 | -1.185658 | 3.025537  |
| 37 | 1  | 0 | -3.067974 | 0.088341  | 1.772061  |
| 38 | 1  | 0 | -2.420376 | -0.785771 | -2.469344 |
| 39 | 1  | 0 | -2.999087 | -3.187705 | -2.814859 |
| 40 | 1  | 0 | -2.405884 | -4.881663 | -1.074249 |
| 41 | 1  | 0 | -1.238391 | -4.158645 | 1.015547  |
| 42 | 1  | 0 | -0.679038 | -1.747669 | 1.363473  |
| 43 | 1  | 0 | 2.459051  | 1.901509  | 0.764929  |
| 44 | 1  | 0 | 4.124667  | 3.757444  | 0.925831  |
| 45 | 1  | 0 | 3.512292  | 6.068269  | 0.183373  |
| 46 | 1  | 0 | 1.213952  | 6.505112  | -0.707921 |
| 47 | 1  | 0 | -0.442218 | 4.650853  | -0.861704 |
| 48 | 1  | 0 | 6.679087  | -3.866866 | 0.407849  |
| 49 | 1  | 0 | 6.858536  | -1.359193 | 0.654130  |
| 50 | 1  | 0 | 4.787765  | 0.025376  | 0.456979  |
| 51 | 1  | 0 | 2.425023  | -3.345811 | -0.197754 |
| 52 | 1  | 0 | 4.401091  | -4.867746 | -0.028000 |

-----  
Cat-Pd0\_PhBr\_cplx

| -----  |        |        |                         |           |           |  |
|--------|--------|--------|-------------------------|-----------|-----------|--|
| Center | Atomic | Atomic | Coordinates (Angstroms) |           |           |  |
| Number | Number | Type   | X                       | Y         | Z         |  |
| -----  |        |        |                         |           |           |  |
| 1      | 7      | 0      | 0.661478                | 2.320430  | -0.965623 |  |
| 2      | 7      | 0      | 2.021140                | 2.439381  | -1.353268 |  |
| 3      | 6      | 0      | 2.672496                | 1.674490  | -0.487153 |  |
| 4      | 7      | 0      | 1.775278                | 1.070576  | 0.409536  |  |
| 5      | 6      | 0      | 0.457246                | 1.476285  | 0.113804  |  |
| 6      | 7      | 0      | 4.051553                | 1.570913  | -0.450502 |  |
| 7      | 6      | 0      | 4.804768                | 0.362918  | -0.472892 |  |
| 8      | 6      | 0      | 6.189443                | 0.434309  | -0.194601 |  |
| 9      | 6      | 0      | 6.977271                | -0.728562 | -0.239869 |  |
| 10     | 6      | 0      | 6.395554                | -1.976422 | -0.547220 |  |
| 11     | 6      | 0      | 5.015104                | -2.042243 | -0.821227 |  |
| 12     | 6      | 0      | 4.219211                | -0.882096 | -0.794265 |  |
| 13     | 6      | 0      | -0.300228               | 3.082001  | -1.711832 |  |
| 14     | 6      | 0      | 2.136373                | 0.267200  | 1.553930  |  |
| 15     | 6      | 0      | 3.003964                | 0.800628  | 2.524634  |  |
| 16     | 6      | 0      | 3.346635                | 0.023580  | 3.647368  |  |
| 17     | 6      | 0      | 2.817604                | -1.273674 | 3.800550  |  |
| 18     | 6      | 0      | 1.945250                | -1.795272 | 2.823302  |  |
| 19     | 6      | 0      | 1.603075                | -1.027033 | 1.695592  |  |
| 20     | 6      | 0      | -1.673693               | 2.767415  | -1.655875 |  |
| 21     | 6      | 0      | -2.592857               | 3.534214  | -2.393469 |  |
| 22     | 6      | 0      | -2.154371               | 4.605754  | -3.196856 |  |
| 23     | 6      | 0      | -0.778468               | 4.905464  | -3.255069 |  |
| 24     | 6      | 0      | 0.150676                | 4.149283  | -2.518354 |  |
| 25     | 46     | 0      | -1.188414               | 0.962419  | 1.113675  |  |
| 26     | 7      | 0      | -2.890721               | 0.467983  | 2.281403  |  |
| 27     | 6      | 0      | -2.879312               | -0.622852 | 3.105061  |  |
| 28     | 6      | 0      | -3.981843               | -0.981229 | 3.895632  |  |
| 29     | 6      | 0      | -5.146908               | -0.191918 | 3.845767  |  |



|    |   |   |           |           |           |
|----|---|---|-----------|-----------|-----------|
| 30 | 6 | 0 | -5.163468 | 0.933298  | 2.999348  |
| 31 | 6 | 0 | -4.024259 | 1.230367  | 2.235560  |
| 32 | 1 | 0 | 4.551595  | 2.422151  | -0.684536 |
| 33 | 1 | 0 | 6.640357  | 1.391630  | 0.056454  |
| 34 | 1 | 0 | 8.041551  | -0.660489 | -0.028720 |
| 35 | 1 | 0 | 7.005588  | -2.874987 | -0.576438 |
| 36 | 1 | 0 | 4.554977  | -2.995507 | -1.069304 |
| 37 | 1 | 0 | 3.163492  | -0.947930 | -1.040520 |
| 38 | 1 | 0 | 3.399147  | 1.805518  | 2.408875  |
| 39 | 1 | 0 | 4.015571  | 0.432841  | 4.399588  |
| 40 | 1 | 0 | 3.081205  | -1.870330 | 4.669859  |
| 41 | 1 | 0 | 1.535979  | -2.795683 | 2.935530  |
| 42 | 1 | 0 | 0.939438  | -1.423295 | 0.933923  |
| 43 | 1 | 0 | -2.007347 | 1.942200  | -1.030665 |
| 44 | 1 | 0 | -3.650509 | 3.287492  | -2.344407 |
| 45 | 1 | 0 | -2.868894 | 5.192827  | -3.767584 |
| 46 | 1 | 0 | -0.425555 | 5.728357  | -3.871378 |
| 47 | 1 | 0 | 1.208291  | 4.379254  | -2.562363 |
| 48 | 1 | 0 | -6.014195 | -0.445401 | 4.447984  |
| 49 | 1 | 0 | -6.037745 | 1.571755  | 2.927309  |
| 50 | 1 | 0 | -4.000362 | 2.088335  | 1.574062  |
| 51 | 1 | 0 | -1.965553 | -1.205238 | 3.119585  |
| 52 | 1 | 0 | -3.921662 | -1.857437 | 4.532679  |
| 53 | 6 | 0 | -2.563526 | -1.835693 | -1.340437 |
| 54 | 6 | 0 | -1.972104 | -2.933401 | -1.984842 |
| 55 | 6 | 0 | -2.700010 | -3.788863 | -2.828218 |
| 56 | 6 | 0 | -4.072132 | -3.529867 | -3.029193 |
| 57 | 6 | 0 | -4.691399 | -2.434668 | -2.393887 |
| 58 | 6 | 0 | -3.936770 | -1.592475 | -1.553080 |
| 59 | 1 | 0 | -1.987978 | -1.178936 | -0.689891 |
| 60 | 1 | 0 | -2.223120 | -4.632431 | -3.317416 |
| 61 | 1 | 0 | -4.646555 | -4.184200 | -3.679370 |
| 62 | 1 | 0 | -5.748570 | -2.240294 | -2.552618 |

|    |    |   |           |           |           |
|----|----|---|-----------|-----------|-----------|
| 63 | 1  | 0 | -4.407029 | -0.745701 | -1.059838 |
| 64 | 35 | 0 | -0.043317 | -3.291610 | -1.695541 |

-----

**int01-3**

-----

| Center | Atomic | Atomic | Coordinates (Angstroms) |   |   |
|--------|--------|--------|-------------------------|---|---|
| Number | Number | Type   | X                       | Y | Z |

-----

|    |   |   |           |           |           |
|----|---|---|-----------|-----------|-----------|
| 1  | 7 | 0 | 0.452103  | 2.174304  | -0.310800 |
| 2  | 7 | 0 | 1.769614  | 2.602407  | -0.013794 |
| 3  | 6 | 0 | 2.438030  | 1.466444  | 0.181369  |
| 4  | 7 | 0 | 1.581055  | 0.363065  | -0.000950 |
| 5  | 6 | 0 | 0.306064  | 0.817852  | -0.323189 |
| 6  | 7 | 0 | 3.756643  | 1.416360  | 0.577120  |
| 7  | 6 | 0 | 4.787314  | 0.624711  | -0.012421 |
| 8  | 6 | 0 | 5.999539  | 0.474329  | 0.697811  |
| 9  | 6 | 0 | 7.053303  | -0.268291 | 0.137830  |
| 10 | 6 | 0 | 6.905928  | -0.880172 | -1.124501 |
| 11 | 6 | 0 | 5.694239  | -0.727499 | -1.826805 |
| 12 | 6 | 0 | 4.638603  | 0.027713  | -1.283518 |
| 13 | 6 | 0 | -0.551935 | 3.176551  | -0.539546 |
| 14 | 6 | 0 | 1.887544  | -1.031434 | 0.225092  |
| 15 | 6 | 0 | 2.443286  | -1.430799 | 1.454200  |
| 16 | 6 | 0 | 2.708718  | -2.794355 | 1.675571  |
| 17 | 6 | 0 | 2.408473  | -3.748469 | 0.682051  |
| 18 | 6 | 0 | 1.844439  | -3.334924 | -0.541376 |
| 19 | 6 | 0 | 1.586640  | -1.972004 | -0.776626 |
| 20 | 6 | 0 | -1.641670 | 2.908929  | -1.390741 |
| 21 | 6 | 0 | -2.623006 | 3.896924  | -1.586852 |
| 22 | 6 | 0 | -2.509349 | 5.150999  | -0.954689 |
| 23 | 6 | 0 | -1.403111 | 5.413307  | -0.121345 |
| 24 | 6 | 0 | -0.420812 | 4.429702  | 0.090180  |

|    |    |   |           |           |           |
|----|----|---|-----------|-----------|-----------|
| 25 | 46 | 0 | -1.434099 | -0.423802 | -0.561491 |
| 26 | 7  | 0 | -2.077880 | -0.257652 | 1.394767  |
| 27 | 6  | 0 | -1.693315 | -1.187162 | 2.313887  |
| 28 | 6  | 0 | -2.079561 | -1.087878 | 3.657674  |
| 29 | 6  | 0 | -2.884538 | -0.006658 | 4.063511  |
| 30 | 6  | 0 | -3.277642 | 0.945584  | 3.104574  |
| 31 | 6  | 0 | -2.858640 | 0.791626  | 1.775600  |
| 32 | 1  | 0 | 4.055507  | 2.185707  | 1.167733  |
| 33 | 1  | 0 | 6.111613  | 0.932150  | 1.677798  |
| 34 | 1  | 0 | 7.983676  | -0.374424 | 0.689877  |
| 35 | 1  | 0 | 7.719722  | -1.458918 | -1.552359 |
| 36 | 1  | 0 | 5.571124  | -1.184538 | -2.805397 |
| 37 | 1  | 0 | 3.724949  | 0.163198  | -1.855053 |
| 38 | 1  | 0 | 2.658244  | -0.695393 | 2.223416  |
| 39 | 1  | 0 | 3.138466  | -3.109534 | 2.622275  |
| 40 | 1  | 0 | 2.611561  | -4.800959 | 0.859608  |
| 41 | 1  | 0 | 1.613156  | -4.065407 | -1.311430 |
| 42 | 1  | 0 | 1.174558  | -1.642886 | -1.726806 |
| 43 | 1  | 0 | -1.715171 | 1.957844  | -1.908211 |
| 44 | 1  | 0 | -3.464091 | 3.690307  | -2.242830 |
| 45 | 1  | 0 | -3.266341 | 5.913679  | -1.114584 |
| 46 | 1  | 0 | -1.305215 | 6.379248  | 0.366376  |
| 47 | 1  | 0 | 0.429963  | 4.623039  | 0.733673  |
| 48 | 1  | 0 | -3.197518 | 0.090541  | 5.098295  |
| 49 | 1  | 0 | -3.897333 | 1.794487  | 3.371277  |
| 50 | 1  | 0 | -3.135711 | 1.502180  | 1.007124  |
| 51 | 1  | 0 | -1.077808 | -2.003381 | 1.958458  |
| 52 | 1  | 0 | -1.754020 | -1.845831 | 4.361444  |
| 53 | 6  | 0 | -4.301398 | -1.079545 | -1.171539 |
| 54 | 6  | 0 | -3.022952 | -1.614908 | -0.899261 |
| 55 | 6  | 0 | -2.806395 | -3.006594 | -1.020239 |
| 56 | 6  | 0 | -3.851411 | -3.850631 | -1.457351 |
| 57 | 6  | 0 | -5.120452 | -3.311311 | -1.753424 |

|    |   |   |           |           |           |
|----|---|---|-----------|-----------|-----------|
| 58 | 6 | 0 | -5.344055 | -1.926173 | -1.609428 |
| 59 | 1 | 0 | -4.493575 | -0.014044 | -1.056356 |
| 60 | 1 | 0 | -1.834152 | -3.438245 | -0.785917 |
| 61 | 1 | 0 | -3.675601 | -4.919604 | -1.558774 |
| 62 | 1 | 0 | -5.926223 | -3.962574 | -2.084032 |
| 63 | 1 | 0 | -6.323248 | -1.506342 | -1.830414 |

---
